# Supplementary material
Source: MDPI journal article supplement (https://www.mdpi.com/search?q=forests-10-00304)
Supplement: s001 [file forests-10-00304-s001.pdf]

## Supplementary Materials

**Table S1.** The most serious insect, disease, and parasitic plant agents for each of 419 tree species native to the conterminous United States, up to five per species. Nonnative invasive agents are indicated with \*. Taxon (T) is identified for each agent (I=insect, D=disease, P=parasitic plant, C=insect and disease multi-agent complex), and Guild (G) is identified for insect agents (B=phloem- or wood-borers, F=foliage-feeders, S=sap-feeders). The agents are sorted by Severity (Sev.) within each species. The sources of the information are also provided.

| Host species scientific name                                    | Host species common name | Agent                                                                   | T/G             | Sev.                                                 | Sources   |
|-----------------------------------------------------------------|--------------------------|-------------------------------------------------------------------------|-----------------|------------------------------------------------------|-----------|
| <i>Abies amabilis</i>                                           | Pacific silver fir       | Silver fir beetle ( <i>Pseudohylesinus sericeus</i> )                   | I/B             | 5                                                    | [1,2]     |
|                                                                 |                          | Balsam woolly adelgid ( <i>Adelges piceae</i> )*                        | I/S             | 3                                                    | [2,3]     |
|                                                                 |                          | Heterobasidion root disease P-type ( <i>Heterobasidion irregulare</i> ) | D               | 3                                                    | [2]       |
|                                                                 |                          | Laminated root rot ( <i>Phellinus sulphurascens</i> )                   | D               | 3                                                    | [4]       |
|                                                                 |                          | Indian paint fungus ( <i>Echinodontium tinctorium</i> )                 | D               | 1                                                    | [2]       |
| <i>Abies balsamea</i>                                           | balsam fir               | Balsam woolly adelgid ( <i>Adelges piceae</i> )*                        | I/S             | 8                                                    | [1,3,5]   |
|                                                                 |                          | Spruce budworm ( <i>Choristoneura fumiferana</i> )                      | I/F             | 8                                                    | [1]       |
|                                                                 |                          | Armillaria root disease ( <i>Armillaria</i> spp.)                       | D               | 1                                                    | [1,6]     |
|                                                                 |                          | Red heart fungus ( <i>Stereum sanguinolentum</i> )                      | D               | 1                                                    | [1,6,7]   |
|                                                                 |                          | Rust fungus ( <i>Melampsorella caryophyllacearum</i> )                  | D               | 1                                                    | [1,6]     |
|                                                                 |                          | <i>Abies bracteata</i>                                                  | bristlecone fir | Lophodermium needle cast ( <i>Lophodermium</i> spp.) | D         |
| Needle cast ( <i>Lirula nervisequia</i> var. <i>conspicua</i> ) | D                        |                                                                         |                 | 1                                                    | [8-10]    |
| True fir bark beetles ( <i>Scolytus dentatus</i> )              | I/B                      |                                                                         |                 | 1                                                    | [11]      |
| <i>Abies concolor</i>                                           | white fir                | Armillaria root disease ( <i>Armillaria</i> spp.)                       | D               | 5                                                    | [12,13]   |
|                                                                 |                          | Fir engraver ( <i>Scolytus ventralis</i> )                              | I/B             | 5                                                    | [1]       |
|                                                                 |                          | Douglas-fir tussock moth ( <i>Orgyia pseudotsugata</i> )                | I/F             | 3                                                    | [1,14,15] |
|                                                                 |                          | Heterobasidion root disease P-type ( <i>Heterobasidion irregulare</i> ) | D               | 3                                                    | [16]      |
|                                                                 |                          | Western spruce budworm ( <i>Choristoneura freemani</i> )                | I/F             | 3                                                    | [1]       |
| <i>Abies fraseri</i>                                            | Fraser fir               | Balsam woolly adelgid ( <i>Adelges piceae</i> )*                        | I/S             | 8                                                    | [1]       |
|                                                                 |                          | Phytophthora root rot ( <i>Phytophthora cinnamomi</i> )*                | D               | 5                                                    | [1,17]    |
|                                                                 |                          | Armillaria root disease ( <i>Armillaria</i> spp.)                       | D               | 3                                                    | [1]       |
|                                                                 |                          | Two-spotted spider mite ( <i>Tetranychus urticae</i> )                  | I/S             | 1                                                    | [1]       |
| <i>Abies grandis</i>                                            | grand fir                | Armillaria root disease ( <i>Armillaria</i> spp.)                       | D               | 8                                                    | [1,6,18]  |
|                                                                 |                          | Fir engraver ( <i>Scolytus ventralis</i> )                              | I/B             | 8                                                    | [1,19]    |

| Host species scientific name                  | Host species common name | Agent                                                                             | T/G | Sev. | Sources   |
|-----------------------------------------------|--------------------------|-----------------------------------------------------------------------------------|-----|------|-----------|
| <i>Abies lasiocarpa</i>                       | subalpine fir            | Laminated root rot ( <i>Phellinus sulphurascens</i> )                             | D   | 8    | [1,20]    |
|                                               |                          | Balsam woolly adelgid ( <i>Adelges piceae</i> )*                                  | I/S | 3    | [2,3]     |
|                                               |                          | Heterobasidion root disease P-type ( <i>Heterobasidion irregulare</i> )           | D   | 3    | [1]       |
|                                               |                          | Armillaria root disease ( <i>Armillaria</i> spp.)                                 | D   | 8    | [1,18,21] |
|                                               |                          | Balsam woolly adelgid ( <i>Adelges piceae</i> )*                                  | I/S | 8    | [1,22,23] |
|                                               |                          | Western balsam bark beetle ( <i>Dryocoetes confusus</i> )                         | I/B | 8    | [1,12,24] |
|                                               |                          | Heterobasidion root disease P-type ( <i>Heterobasidion irregulare</i> )           | D   | 3    | [16]      |
| <i>Abies lasiocarpa</i> var. <i>arizonica</i> | corkbark fir             | Western spruce budworm ( <i>Choristoneura freemani</i> )                          | I/F | 1    | [1,25]    |
|                                               |                          | Western balsam bark beetle ( <i>Dryocoetes confusus</i> )                         | I/B | 5    | [1,26]    |
|                                               |                          | Armillaria root disease ( <i>Armillaria</i> spp.)                                 | D   | 3    | [1,18,21] |
|                                               |                          | Heterobasidion root disease P-type ( <i>Heterobasidion irregulare</i> )           | D   | 3    | [16]      |
| <i>Abies magnifica</i>                        | California red fir       | Western spruce budworm ( <i>Choristoneura freemani</i> )                          | I/F | 3    | [1,25]    |
|                                               |                          | Fir engraver ( <i>Scolytus ventralis</i> )                                        | I/B | 3    | [1,26,27] |
|                                               |                          | Heterobasidion root disease P-type ( <i>Heterobasidion irregulare</i> )           | D   | 3    | [16]      |
|                                               |                          | Indian paint fungus ( <i>Echinodontium tinctorium</i> )                           | D   | 1    | [1,28]    |
|                                               |                          | Laminated root rot ( <i>Phellinus sulphurascens</i> )                             | D   | 1    | [4]       |
| <i>Abies magnifica</i> var. <i>shastensis</i> | Shasta red fir           | Red fir dwarf mistletoe ( <i>Arceuthobium abietinum</i> f. sp. <i>magnifica</i> ) | P   | 1    | [1]       |
|                                               |                          | Fir engraver ( <i>Scolytus ventralis</i> )                                        | I/B | 3    | [29]      |
|                                               |                          | Armillaria root disease ( <i>Armillaria</i> spp.)                                 | D   | 1    | [29]      |
|                                               |                          | Indian paint fungus ( <i>Echinodontium tinctorium</i> )                           | D   | 1    | [28]      |
|                                               |                          | Red fir dwarf mistletoe ( <i>Arceuthobium abietinum</i> f. sp. <i>magnifica</i> ) | P   | 1    | [30]      |
|                                               |                          | Red ring rot canker ( <i>Phenillus cancriformans</i> )                            | D   | 1    | [29]      |
| <i>Abies procera</i>                          | noble fir                | Indian paint fungus ( <i>Echinodontium tinctorium</i> )                           | D   | 5    | [1,31]    |
|                                               |                          | Heterobasidion root disease P-type ( <i>Heterobasidion irregulare</i> )           | D   | 3    | [16]      |
|                                               |                          | Red ring rot ( <i>Phellinus pini</i> var. <i>cancriformans</i> )                  | D   | 3    | [1]       |

T/G=Taxon/Guild. Taxon: I=insect, D=disease, P=parasitic plant, C=insect and disease multi-agent complex; Guild (for insects): B=phloem- or wood-borers, F=foliage-feeders, S=sap-feeders. Sev.=Severity. Nonnative invasive agents are indicated with \*.

| Host species scientific name | Host species common name | Agent                                                           | T/G | Sev. | Sources |
|------------------------------|--------------------------|-----------------------------------------------------------------|-----|------|---------|
| <i>Acacia farnesiana</i>     | sweet acacia             | Schweinitzii root and butt rot ( <i>Phaeolus schweinitzii</i> ) | D   | 3    | [1]     |
|                              |                          | Laminated root rot ( <i>Phellinus sulphurascens</i> )           | D   | 1    | [4]     |
|                              |                          | Clitocybe root rot ( <i>Armillaria tabescens</i> )              | D   | 1    | [13,32] |
|                              |                          | Cotton root rot ( <i>Phymatotrichopsis omnivora</i> )           | D   | 1    | [13,32] |
|                              |                          | Rust ( <i>Ravenelia</i> spp.)                                   | D   | 1    | [32]    |
| <i>Acacia greggii</i>        | catclaw acacia           | Twig girdler ( <i>Oncideres pustulatus</i> )                    | I/B | 1    | [32]    |
|                              |                          | Mistletoe ( <i>Phoradendron californicum</i> )                  | P   | 1    | [33]    |
|                              |                          | Rust ( <i>Ravenelia versatilis</i> )                            | D   | 1    | [8]     |
| <i>Acer floridanum</i>       | Florida maple            | White rot ( <i>Phellinus badius</i> )                           | D   | 1    | [8]     |
|                              |                          | Asian longhorned beetle ( <i>Anoplophora glabripennis</i> )*    | I/B | 8    | [34,35] |
|                              |                          | Japanese beetle ( <i>Popillia japonica</i> )*                   | I/F | 1    | [34,35] |
| <i>Acer glabrum</i>          | Rocky Mountain maple     | Oystershell scale ( <i>Lepidosaphes ulmi</i> )*                 | I/S | 1    | [34,35] |
|                              |                          | Asian longhorned beetle ( <i>Anoplophora glabripennis</i> )*    | I/B | 8    | [34,35] |
|                              |                          | White spongy rot ( <i>Phellinus igniarius</i> )                 | D   | 3    | [13]    |
| <i>Acer grandidentatum</i>   | bigtooth maple           | Japanese beetle ( <i>Popillia japonica</i> )*                   | I/F | 1    | [34,35] |
|                              |                          | Oak bracket ( <i>Inonotus dryadeus</i> )                        | D   | 1    | [36]    |
|                              |                          | Oystershell scale ( <i>Lepidosaphes ulmi</i> )*                 | I/S | 1    | [34,35] |
|                              |                          | Asian longhorned beetle ( <i>Anoplophora glabripennis</i> )*    | I/B | 8    | [34,35] |
|                              |                          | Fall cankerworm ( <i>Alsophila pometaria</i> )                  | I/F | 3    | [37]    |
|                              |                          | Japanese beetle ( <i>Popillia japonica</i> )*                   | I/F | 1    | [34,35] |
|                              |                          | Linden looper ( <i>Erranis tiliaria</i> )                       | I/F | 1    | [37]    |
| <i>Acer leucoderme</i>       | chalk maple              | Oystershell scale ( <i>Lepidosaphes ulmi</i> )*                 | I/S | 1    | [34,35] |
|                              |                          | Asian longhorned beetle ( <i>Anoplophora glabripennis</i> )*    | I/B | 8    | [34,35] |
|                              |                          | Japanese beetle ( <i>Popillia japonica</i> )*                   | I/F | 1    | [34,35] |
|                              |                          | Oystershell scale ( <i>Lepidosaphes ulmi</i> )*                 | I/S | 1    | [34,35] |

T/G=Taxon/Guild. Taxon: I=insect, D=disease, P=parasitic plant, C=insect and disease multi-agent complex; Guild (for insects): B=phloem- or wood-borers, F=foliage-feeders, S=sap-feeders. Sev.=Severity. Nonnative invasive agents are indicated with \*.

| Host species scientific name | Host species common name | Agent                                                           | T/G | Sev. | Sources    |
|------------------------------|--------------------------|-----------------------------------------------------------------|-----|------|------------|
| <i>Acer macrophyllum</i>     | bigleaf maple            | Asian longhorned beetle ( <i>Anoplophora glabripennis</i> )*    | I/B | 8    | [34,35]    |
|                              |                          | Polyphagous shot hole borer ( <i>Euwallacea</i> spp.)*          | I/B | 5    | [38]       |
|                              |                          | Sudden oak death ( <i>Phytophthora ramorum</i> )*               | D   | 1    | [7,39]     |
|                              |                          | Verticillium wilt ( <i>Verticillium albo-atrum</i> )            | D   | 1    | [1]        |
| <i>Acer negundo</i>          | boxelder                 | Asian longhorned beetle ( <i>Anoplophora glabripennis</i> )*    | I/B | 8    | [34,35]    |
|                              |                          | Polyphagous shot hole borer ( <i>Euwallacea</i> spp.)*          | I/B | 5    | [38,40]    |
|                              |                          | Eutypella canker ( <i>Eutypella parasitica</i> )                | D   | 1    | [1,41]     |
|                              |                          | Heart rot ( <i>Inonotus glomeratus</i> )                        | D   | 1    | [1,36]     |
|                              |                          | Verticillium wilt ( <i>Verticillium albo-atrum</i> )            | D   | 1    | [1,42]     |
| <i>Acer nigrum</i>           | black maple              | Asian longhorned beetle ( <i>Anoplophora glabripennis</i> )*    | I/B | 8    | [34,35]    |
|                              |                          | Eutypella canker ( <i>Eutypella parasitica</i> )                | D   | 1    | [1,41]     |
|                              |                          | Japanese beetle ( <i>Popillia japonica</i> )*                   | I/F | 1    | [34,35]    |
|                              |                          | Verticillium wilt ( <i>Verticillium albo-atrum</i> )            | D   | 1    | [1,42]     |
| <i>Acer pensyloanicum</i>    | striped maple            | Asian longhorned beetle ( <i>Anoplophora glabripennis</i> )*    | I/B | 8    | [34,35]    |
|                              |                          | Japanese beetle ( <i>Popillia japonica</i> )*                   | I/F | 1    | [34,35]    |
|                              |                          | Leaf spot disease ( <i>Cristulariella depraedans</i> )          | D   | 1    | [1]        |
|                              |                          | Pezicula trunk and branch cankers ( <i>Pezicula subcarnea</i> ) | D   | 1    | [1]        |
|                              |                          | Verticillium wilt ( <i>Verticillium albo-atrum</i> )            | D   | 1    | [1]        |
| <i>Acer rubrum</i>           | red maple                | Asian longhorned beetle ( <i>Anoplophora glabripennis</i> )*    | I/B | 8    | [34,35,43] |
|                              |                          | Armillaria root disease ( <i>Armillaria</i> spp.)               | D   | 1    | [1]        |
|                              |                          | Bacterial leaf scorch ( <i>Xylella fastidiosa</i> )             | D   | 1    | [42,44]    |
|                              |                          | Heart rot ( <i>Inonotus glomeratus</i> )                        | D   | 1    | [1,36,42]  |
|                              |                          | Verticillium wilt ( <i>Verticillium albo-atrum</i> )            | D   | 1    | [35,42,45] |
| <i>Acer saccharinum</i>      | silver maple             | Asian longhorned beetle ( <i>Anoplophora glabripennis</i> )*    | I/B | 8    | [34,35]    |
|                              |                          | Armillaria root disease ( <i>Armillaria</i> spp.)               | D   | 1    | [1]        |

T/G=Taxon/Guild. Taxon: I=insect, D=disease, P=parasitic plant, C=insect and disease multi-agent complex; Guild (for insects): B=phloem- or wood-borers, F=foliage-feeders, S=sap-feeders. Sev.=Severity. Nonnative invasive agents are indicated with \*.

| Host species scientific name  | Host species common name | Agent                                                        | T/G | Sev. | Sources    |
|-------------------------------|--------------------------|--------------------------------------------------------------|-----|------|------------|
| <i>Acer saccharum</i>         | sugar maple              | Japanese beetle ( <i>Popillia japonica</i> )*                | I/F | 1    | [34,35]    |
|                               |                          | Nectria canker ( <i>Nectria ditissima</i> )                  | D   | 1    | [1]        |
|                               |                          | Verticillium wilt ( <i>Verticillium albo-atrum</i> )         | D   | 1    | [1,35]     |
|                               |                          | Asian longhorned beetle ( <i>Anoplophora glabripennis</i> )* | I/B | 8    | [34,35]    |
|                               |                          | Armillaria root disease ( <i>Armillaria</i> spp.)            | D   | 1    | [1]        |
|                               |                          | Bacterial leaf scorch ( <i>Xylella fastidiosa</i> )          | D   | 1    | [42,44]    |
|                               |                          | Nectria canker ( <i>Nectria ditissima</i> )                  | D   | 1    | [1,36]     |
| <i>Acer spicatum</i>          | mountain maple           | Verticillium wilt ( <i>Verticillium albo-atrum</i> )         | D   | 1    | [1,42]     |
|                               |                          | Asian longhorned beetle ( <i>Anoplophora glabripennis</i> )* | I/B | 8    | [34,35]    |
|                               |                          | Japanese beetle ( <i>Popillia japonica</i> )*                | I/F | 1    | [34,46]    |
|                               |                          | Nectria canker ( <i>Nectria</i> sp.)                         | D   | 1    | [33]       |
|                               |                          | Powdery mildew ( <i>Phyllactinia guttata</i> )               | D   | 1    | [33]       |
| <i>Acoelorrhaphe wrightii</i> | Everglades palm          | Verticillium wilt ( <i>Verticillium dahliae</i> )            | D   | 1    | [33,47]    |
|                               |                          | Ganoderma butt rot ( <i>Ganoderma zonatum</i> )              | D   | 1    | [36,48]    |
|                               |                          | Nematode ( <i>Rotylenchulus reniformis</i> )                 | D   | 1    | [49]       |
| <i>Aesculus californica</i>   | California buckeye       | Stigmata leaf spot ( <i>Stigmata palmivora</i> )             | D   | 1    | [36]       |
|                               |                          | Asian longhorned beetle ( <i>Anoplophora glabripennis</i> )* | I/B | 5    | [34,35]    |
|                               |                          | Bacterial leaf scorch ( <i>Xylella fastidiosa</i> )          | D   | 1    | [35,36,50] |
|                               |                          | Eastern mistletoe ( <i>Phoradendron leucarpum</i> )          | P   | 1    | [36]       |
| <i>Aesculus flava</i>         | yellow buckeye           | Sudden oak death ( <i>Phytophthora ramorum</i> )*            | D   | 1    | [36,51]    |
|                               |                          | Asian longhorned beetle ( <i>Anoplophora glabripennis</i> )* | I/B | 5    | [34,35]    |
|                               |                          | Heart rot ( <i>Flammulina velutipes</i> )                    | D   | 1    | [1]        |
|                               |                          | Oak bracket ( <i>Inonotus dryadeus</i> )                     | D   | 1    | [36]       |
|                               |                          | Powdery mildew ( <i>Erysiphe flexuosa</i> )                  | D   | 1    | [1]        |
|                               |                          | Root-knot nematode ( <i>Meloidogyne</i> spp.)                | D   | 1    | [52]       |

T/G=Taxon/Guild. Taxon: I=insect, D=disease, P=parasitic plant, C=insect and disease multi-agent complex; Guild (for insects): B=phloem- or wood-borers, F=foliage-feeders, S=sap-feeders. Sev.=Severity. Nonnative invasive agents are indicated with \*.

| Host species scientific name               | Host species common name | Agent                                                        | T/G | Sev. | Sources |
|--------------------------------------------|--------------------------|--------------------------------------------------------------|-----|------|---------|
| <i>Aesculus glabra</i>                     | Ohio buckeye             | Asian longhorned beetle ( <i>Anoplophora glabripennis</i> )* | I/B | 5    | [34,35] |
|                                            |                          | Artist's conk ( <i>Ganoderma applanatum</i> )                | D   | 1    | [1,35]  |
|                                            |                          | Guignardia blotch ( <i>Guignardia aesculi</i> )              | D   | 1    | [1]     |
|                                            |                          | Powdery mildew ( <i>Erysiphe flexuosa</i> )                  | D   | 1    | [1]     |
| <i>Aesculus glabra</i> var. <i>arguta</i>  | Texas buckeye            | Asian longhorned beetle ( <i>Anoplophora glabripennis</i> )* | I/B | 5    | [34]    |
| <i>Aesculus pavia</i>                      | red buckeye              | Asian longhorned beetle ( <i>Anoplophora glabripennis</i> )* | I/B | 5    | [34,35] |
|                                            |                          | Guignardia blotch ( <i>Guignardia aesculi</i> )              | D   | 1    | [36]    |
| <i>Aesculus sylvatica</i>                  | painted buckeye          | Asian longhorned beetle ( <i>Anoplophora glabripennis</i> )* | I/B | 5    | [34,35] |
|                                            |                          | Powdery mildew ( <i>Erysiphe flexuosa</i> )                  | D   | 1    | [53]    |
| <i>Alnus incana</i> ssp. <i>tenuifolia</i> | thinleaf alder           | Phytophthora disease of alders ( <i>Phytophthora</i> sp.)    | D   | 5    | [54]    |
|                                            |                          | Alder canker ( <i>Valsa melanodiscus</i> )                   | D   | 3    | [13,55] |
|                                            |                          | Green alder sawfly ( <i>Monsoma pulveratum</i> )*            | I/F | 3    | [56,57] |
|                                            |                          | Collar rot ( <i>Phytophthora siskiyouensis</i> )             | D   | 1    | [36]    |
| <i>Alnus maritima</i>                      | seaside alder            | Gypsy moth ( <i>Lymantria dispar dispar</i> )*               | I/F | 3    | [37]    |
| <i>Alnus oblongifolia</i>                  | Arizona alder            | none                                                         | .   | .    | .       |
| <i>Alnus rhombifolia</i>                   | white alder              | Phytophthora disease of alders ( <i>Phytophthora</i> sp.)    | D   | 5    | [54]    |
|                                            |                          | Alder canker ( <i>Valsa melanodiscus</i> )                   | D   | 3    | [13]    |
|                                            |                          | Green alder sawfly ( <i>Monsoma pulveratum</i> )*            | I/F | 3    | [56,57] |
|                                            |                          | Collar rot ( <i>Phytophthora siskiyouensis</i> )             | D   | 1    | [36]    |
| <i>Alnus rubra</i>                         | red alder                | Alder bark beetle ( <i>Alniphagus aspericollis</i> )         | I/B | 5    | [11]    |
|                                            |                          | Phytophthora disease of alders ( <i>Phytophthora</i> sp.)    | D   | 5    | [54]    |
|                                            |                          | Alder canker ( <i>Valsa melanodiscus</i> )                   | D   | 3    | [58]    |
|                                            |                          | Forest tent caterpillar ( <i>Malacosoma disstria</i> )       | I/F | 3    | [1,59]  |
| <i>Amelanchier arborea</i>                 | common serviceberry      | Gypsy moth ( <i>Lymantria dispar dispar</i> )*               | I/F | 3    | [60]    |
|                                            |                          | Blister canker ( <i>Biscogniauxia marginata</i> )            | D   | 1    | [36]    |

T/G=Taxon/Guild. Taxon: I=insect, D=disease, P=parasitic plant, C=insect and disease multi-agent complex; Guild (for insects): B=phloem- or wood-borers, F=foliage-feeders, S=sap-feeders. Sev.=Severity. Nonnative invasive agents are indicated with \*.

| Host species scientific name                    | Host species common name | Agent                                                        | T/G           | Sev.                                                       | Sources   |   |        |
|-------------------------------------------------|--------------------------|--------------------------------------------------------------|---------------|------------------------------------------------------------|-----------|---|--------|
| <i>Amelanchier sanguinea</i>                    | roundleaf serviceberry   | Fire blight ( <i>Erwinia amylovora</i> )                     | D             | 1                                                          | [61,62]   |   |        |
|                                                 |                          | Witches'-broom ( <i>Apiosporina collinsii</i> )              | D             | 1                                                          | [36]      |   |        |
|                                                 |                          | Gypsy moth ( <i>Lymantria dispar dispar</i> )*               | I/F           | 3                                                          | [60]      |   |        |
|                                                 |                          | Blister canker ( <i>Biscogniauxia marginata</i> )            | D             | 1                                                          | [36]      |   |        |
|                                                 |                          | Fire blight ( <i>Erwinia amylovora</i> )                     | D             | 1                                                          | [61,62]   |   |        |
| <i>Amyris elemifera</i>                         | sea torchwood            | Witches'-broom ( <i>Apiosporina collinsii</i> )              | D             | 1                                                          | [36]      |   |        |
|                                                 |                          | none                                                         | .             | .                                                          | .         |   |        |
| <i>Annona glabra</i>                            | pond-apple               | none                                                         | .             | .                                                          | .         |   |        |
| <i>Arbutus arizonica</i>                        | Arizona madrone          | Bark beetle ( <i>Liparthrum arizonicum</i> )                 | I/B           | 1                                                          | [11]      |   |        |
| <i>Arbutus menziesii</i>                        | Pacific madrone          | Crown canker and root rot ( <i>Phytophthora cactorum</i> )   | D             | 3                                                          | [1,63]    |   |        |
|                                                 |                          | Heterobasidion root disease ( <i>Heterobasidion</i> spp.)    | D             | 3                                                          | [1,63]    |   |        |
|                                                 |                          | Madrone canker ( <i>Neofusicoccum arbuti</i> )               | D             | 3                                                          | [1,63,64] |   |        |
|                                                 |                          | Sudden oak death ( <i>Phytophthora ramorum</i> )*            | D             | 3                                                          | [34,65]   |   |        |
|                                                 |                          | Arbutus canker ( <i>Nattrassia mangiferae</i> )              | D             | 1                                                          | [7,66]    |   |        |
|                                                 |                          | <i>Arbutus xalapensis</i>                                    | Texas madrone | Crown canker and root rot ( <i>Phytophthora cactorum</i> ) | D         | 3 | [1,63] |
|                                                 |                          |                                                              |               | Heterobasidion root disease ( <i>Heterobasidion</i> spp.)  | D         | 3 | [1,63] |
| Madrone canker ( <i>Neofusicoccum arbuti</i> )  | D                        |                                                              |               | 3                                                          | [1,63,64] |   |        |
| Arbutus canker ( <i>Nattrassia mangiferae</i> ) | D                        |                                                              |               | 1                                                          | [7,66]    |   |        |
| <i>Asimina triloba</i>                          | pawpaw                   | Sudden oak death ( <i>Phytophthora ramorum</i> )*            | D             | 1                                                          | [34,65]   |   |        |
|                                                 |                          | Coral spot fungus ( <i>Nectria cinnabarina</i> )             | D             | 1                                                          | [13,36]   |   |        |
|                                                 |                          | Japanese beetle ( <i>Popillia japonica</i> )*                | I/F           | 1                                                          | [67]      |   |        |
| <i>Avicennia germinans</i>                      | black-mangrove           | Butt rot fungi ( <i>Phellinus swieteniae</i> )               | D             | 3                                                          | [68]      |   |        |
| <i>Betula alleghaniensis</i>                    | yellow birch             | Asian longhorned beetle ( <i>Anoplophora glabripennis</i> )* | I/B           | 5                                                          | [34,35]   |   |        |
|                                                 |                          | Bronze birch borer ( <i>Agrilus anxius</i> )                 | I/B           | 1                                                          | [1,69,70] |   |        |
|                                                 |                          | Eutypella canker ( <i>Eutypella parasitica</i> )             | D             | 1                                                          | [1,35,36] |   |        |

T/G=Taxon/Guild. Taxon: I=insect, D=disease, P=parasitic plant, C=insect and disease multi-agent complex; Guild (for insects): B=phloem- or wood-borers, F=foliage-feeders, S=sap-feeders. Sev.=Severity. Nonnative invasive agents are indicated with \*.

| Host species scientific name | Host species common name | Agent                                                        | T/G | Sev. | Sources   |
|------------------------------|--------------------------|--------------------------------------------------------------|-----|------|-----------|
| <i>Betula lenta</i>          | sweet birch              | Nectria canker ( <i>Nectria ditissima</i> )                  | D   | 1    | [1,35]    |
|                              |                          | Sterile conk trunk rot ( <i>Inonotus obliquus</i> )          | D   | 1    | [1,36]    |
|                              |                          | Asian longhorned beetle ( <i>Anoplophora glabripennis</i> )* | I/B | 5    | [34,35]   |
|                              |                          | Gypsy moth ( <i>Lymantria dispar dispar</i> )*               | I/F | 1    | [1,35]    |
| <i>Betula nigra</i>          | river birch              | Nectria canker ( <i>Nectria ditissima</i> )                  | D   | 1    | [1,35]    |
|                              |                          | White spongy rot ( <i>Phellinus igniarius</i> )              | D   | 1    | [1,35]    |
|                              |                          | Asian longhorned beetle ( <i>Anoplophora glabripennis</i> )* | I/B | 5    | [34,35]   |
|                              |                          | Gypsy moth ( <i>Lymantria dispar dispar</i> )*               | I/F | 3    | [34,35]   |
|                              |                          | Birch leafminer ( <i>Fenusa pusilla</i> )*                   | I/F | 1    | [34,35]   |
| <i>Betula occidentalis</i>   | water birch              | Eastern mistletoe ( <i>Phoradendron leucarpum</i> )          | P   | 1    | [1]       |
|                              |                          | Oystershell scale ( <i>Lepidosaphes ulmi</i> )*              | I/S | 1    | [34,35]   |
|                              |                          | Asian longhorned beetle ( <i>Anoplophora glabripennis</i> )* | I/B | 5    | [34,35]   |
|                              |                          | Birch rust ( <i>Melampsorium betulinum</i> )                 | D   | 1    | [36]      |
|                              |                          | Bronze birch borer ( <i>Agrilus anxius</i> )                 | I/B | 1    | [35,69]   |
| <i>Betula papyrifera</i>     | paper birch              | Sterile conk trunk rot ( <i>Inonotus obliquus</i> )          | D   | 1    | [36]      |
|                              |                          | Asian longhorned beetle ( <i>Anoplophora glabripennis</i> )* | I/B | 5    | [34,35]   |
|                              |                          | Bronze birch borer ( <i>Agrilus anxius</i> )                 | I/B | 5    | [1,35,36] |
|                              |                          | Birch leafminer ( <i>Fenusa pusilla</i> )*                   | I/F | 3    | [1,34]    |
| <i>Betula populifolia</i>    | gray birch               | Gypsy moth ( <i>Lymantria dispar dispar</i> )*               | I/F | 3    | [1,35]    |
|                              |                          | Tinder conk ( <i>Fomes fomentarius</i> )                     | D   | 1    | [71]      |
|                              |                          | Asian longhorned beetle ( <i>Anoplophora glabripennis</i> )* | I/B | 5    | [34,35]   |
|                              |                          | Gypsy moth ( <i>Lymantria dispar dispar</i> )*               | I/F | 3    | [34,35]   |
|                              |                          | Birch leafminer ( <i>Fenusa pusilla</i> )*                   | I/F | 1    | [35,72]   |
|                              |                          | Bronze birch borer ( <i>Agrilus anxius</i> )                 | I/B | 1    | [70,72]   |
|                              |                          | Sterile conk trunk rot ( <i>Inonotus obliquus</i> )          | D   | 1    | [36]      |

T/G=Taxon/Guild. Taxon: I=insect, D=disease, P=parasitic plant, C=insect and disease multi-agent complex; Guild (for insects): B=phloem- or wood-borers, F=foliage-feeders, S=sap-feeders. Sev.=Severity. Nonnative invasive agents are indicated with \*.



| Host species scientific name            | Host species common name  | Agent                                                                   | T/G | Sev. | Sources |
|-----------------------------------------|---------------------------|-------------------------------------------------------------------------|-----|------|---------|
| <i>Betula uber</i>                      | Virginia roundleaf birch  | Gypsy moth ( <i>Lymantria dispar dispar</i> )*                          | I/F | 1    | [1,35]  |
|                                         |                           | Japanese beetle ( <i>Popillia japonica</i> )*                           | I/F | 1    | [34,73] |
|                                         |                           | Nectria canker ( <i>Nectria ditissima</i> )                             | D   | 1    | [1,35]  |
|                                         |                           | White spongy rot ( <i>Phellinus igniarius</i> )                         | D   | 1    | [1,35]  |
| <i>Bursera simaruba</i>                 | gumbo limbo               | Rugose spiraling whitefly ( <i>Aleurodicus rugioeperculatus</i> )*      | I/S | 1    | [74]    |
|                                         |                           | Scale insect ( <i>Phalacrocooccus howertoni</i> )                       | I/S | 1    | [74]    |
| <i>Callitropsis nootkatensis</i>        | Alaska yellow-cedar       | Cedar bark beetle ( <i>Phloeosinus</i> spp.)                            | I/B | 3    | [13]    |
|                                         |                           | Juniper scale ( <i>Carulaspis juniperi</i> )*                           | I/S | 1    | [34]    |
|                                         |                           | Valsa canker and dieback ( <i>Valsa abietis</i> )                       | D   | 1    | [36]    |
| <i>Calocedrus decurrens</i>             | incense-cedar             | Heterobasidion root disease P-type ( <i>Heterobasidion irregulare</i> ) | D   | 3    | [1,7]   |
|                                         |                           | Pocket dry rot ( <i>Tyromyces amarus</i> )                              | D   | 3    | [1,75]  |
|                                         |                           | Broom rust ( <i>Gymnosporangium libocedri</i> )                         | D   | 1    | [1,7]   |
|                                         |                           | Cedar bark beetle ( <i>Phloeosinus</i> spp.)                            | I/B | 1    | [11]    |
|                                         |                           | Juniper scale ( <i>Carulaspis juniperi</i> )*                           | I/S | 1    | [1,76]  |
| <i>Carnegiea gigantea</i>               | saguaro                   | Bacterial necrosis ( <i>Erwinia cacticida</i> )                         | D   | 1    | [77,78] |
|                                         |                           | Cactus longhorn beetle ( <i>Moneilema gigas</i> )                       | I/B | 1    | [78]    |
| <i>Carpinus caroliniana</i>             | musclewood                | Gypsy moth ( <i>Lymantria dispar dispar</i> )*                          | I/F | 3    | [35,79] |
|                                         |                           | Hornbeam anthracnose ( <i>Apiosporopsis carpineae</i> )                 | D   | 1    | [36]    |
|                                         |                           | Nectria canker ( <i>Nectria ditissima</i> )                             | D   | 1    | [35]    |
|                                         |                           | White rot ( <i>Bjerkandera adusta</i> )                                 | D   | 1    | [80]    |
| <i>Carya aquatica</i>                   | water hickory             | Butt rot ( <i>Hericiium erinaceus</i> )                                 | D   | 1    | [36]    |
|                                         |                           | Hickory borer ( <i>Goes pulcher</i> )                                   | I/B | 1    | [1]     |
| <i>Carya caroliniae-septentrionalis</i> | southern shagbark hickory | Armillaria root disease ( <i>Armillaria</i> spp.)                       | D   | 1    | [36]    |
| <i>Carya cordiformis</i>                | bitternut hickory         | Hickory bark beetle ( <i>Scolytus quadrispinosus</i> )                  | I/B | 1    | [1]     |
|                                         |                           | Hickory borer ( <i>Goes pulcher</i> )                                   | I/B | 1    | [1]     |

T/G=Taxon/Guild. Taxon: I=insect, D=disease, P=parasitic plant, C=insect and disease multi-agent complex; Guild (for insects): B=phloem- or wood-borers, F=foliage-feeders, S=sap-feeders. Sev.=Severity. Nonnative invasive agents are indicated with \*.

| Host species scientific name | Host species common name | Agent                                                      | T/G | Sev. | Sources |
|------------------------------|--------------------------|------------------------------------------------------------|-----|------|---------|
|                              |                          | Nectria canker ( <i>Nectria ditissima</i> )                | D   | 1    | [1]     |
|                              |                          | Spiculosa canker ( <i>Phellinus spiculosus</i> )           | D   | 1    | [1]     |
|                              |                          | White spongy rot ( <i>Phellinus igniarius</i> )            | D   | 1    | [1]     |
| <i>Carya floridana</i>       | scrub hickory            | Wood decay ( <i>Phellinus gilvus</i> )                     | D   | 1    | [81]    |
| <i>Carya glabra</i>          | pignut hickory           | Hickory bark beetle ( <i>Scolytus quadrispinosus</i> )     | I/B | 1    | [1]     |
|                              |                          | Nectria canker ( <i>Nectria ditissima</i> )                | D   | 1    | [1]     |
|                              |                          | Spiculosa canker ( <i>Phellinus spiculosus</i> )           | D   | 1    | [1]     |
|                              |                          | Twig girdler ( <i>Oncideres cingulata</i> )                | I/B | 1    | [1]     |
| <i>Carya illinoensis</i>     | pecan                    | Bacterial leaf scorch ( <i>Xylella fastidiosa</i> )        | D   | 1    | [44]    |
|                              |                          | Crown gall ( <i>Agrobacterium tumefaciens</i> )            | D   | 1    | [1]     |
|                              |                          | Hickory bark beetle ( <i>Scolytus quadrispinosus</i> )     | I/B | 1    | [1]     |
|                              |                          | Hickory borer ( <i>Goes pulcher</i> )                      | I/B | 1    | [1]     |
|                              |                          | Spiculosa canker ( <i>Phellinus spiculosus</i> )           | D   | 1    | [1,82]  |
| <i>Carya laciniosa</i>       | shellbark hickory        | Hickory bark beetle ( <i>Scolytus quadrispinosus</i> )     | I/B | 1    | [1]     |
|                              |                          | Hickory borer ( <i>Goes pulcher</i> )                      | I/B | 1    | [1]     |
|                              |                          | Hickory spiral borer ( <i>Agrilus arcuatus torquatus</i> ) | I/B | 1    | [1]     |
|                              |                          | Twig girdler ( <i>Oncideres cingulata</i> )                | I/B | 1    | [1]     |
| <i>Carya myristiciformis</i> | nutmeg hickory           | Hickory bark beetle ( <i>Scolytus quadrispinosus</i> )     | I/B | 1    | [1]     |
|                              |                          | Twig girdler ( <i>Oncideres cingulata</i> )                | I/B | 1    | [1]     |
| <i>Carya ovalis</i>          | red hickory              | Hickory bark beetle ( <i>Scolytus quadrispinosus</i> )     | I/B | 1    | [1]     |
|                              |                          | Nectria canker ( <i>Nectria ditissima</i> )                | D   | 1    | [1]     |
|                              |                          | Spiculosa canker ( <i>Phellinus spiculosus</i> )           | D   | 1    | [1]     |
|                              |                          | Twig girdler ( <i>Oncideres cingulata</i> )                | I/B | 1    | [1]     |
| <i>Carya ovata</i>           | shagbark hickory         | Crown gall ( <i>Agrobacterium tumefaciens</i> )            | D   | 1    | [1]     |
|                              |                          | Hickory bark beetle ( <i>Scolytus quadrispinosus</i> )     | I/B | 1    | [1]     |

T/G=Taxon/Guild. Taxon: I=insect, D=disease, P=parasitic plant, C=insect and disease multi-agent complex; Guild (for insects): B=phloem- or wood-borers, F=foliage-feeders, S=sap-feeders. Sev.=Severity. Nonnative invasive agents are indicated with \*.

| Host species scientific name                  | Host species common name | Agent                                                      | T/G | Sev. | Sources |
|-----------------------------------------------|--------------------------|------------------------------------------------------------|-----|------|---------|
|                                               |                          | Spiculosa canker ( <i>Phellinus spiculosus</i> )           | D   | 1    | [1]     |
|                                               |                          | Twig girdler ( <i>Oncideres cingulata</i> )                | I/B | 1    | [1]     |
|                                               |                          | Witches broom ( <i>Phytoplasma</i> )                       | D   | 1    | [1,36]  |
| <i>Carya pallida</i>                          | sand hickory             | Wood decay ( <i>Phellinus gilvus</i> )                     | D   | 1    | [81]    |
| <i>Carya texana</i>                           | black hickory            | Twig girdler ( <i>Oncideres cingulata</i> )                | I/B | 1    | [83]    |
| <i>Carya tomentosa</i>                        | mockernut hickory        | Hickory bark beetle ( <i>Scolytus quadrispinosus</i> )     | I/B | 1    | [1]     |
|                                               |                          | Hickory borer ( <i>Goes pulcher</i> )                      | I/B | 1    | [1]     |
|                                               |                          | Hickory spiral borer ( <i>Agrilus arcuatus torquatus</i> ) | I/B | 1    | [1]     |
|                                               |                          | Pecan carpenterworm ( <i>Cossula magnifica</i> )           | I/B | 1    | [1]     |
|                                               |                          | Spiculosa canker ( <i>Phellinus spiculosus</i> )           | D   | 1    | [1]     |
| <i>Castanea dentata</i>                       | American chestnut        | Chestnut blight ( <i>Cryphonectria parasitica</i> )*       | D   | 10   | [34,84] |
|                                               |                          | Phytophthora root rot ( <i>Phytophthora cinnamomi</i> )*   | D   | 8    | [84]    |
|                                               |                          | Twolined chestnut borer ( <i>Agrilus bilineatus</i> )      | I/B | 3    | [37]    |
|                                               |                          | Asiatic oak weevil ( <i>Cyrtopistomus castaneus</i> )*     | I/F | 1    | [85]    |
|                                               |                          | Oak bracket ( <i>Inonotus dryadeus</i> )                   | D   | 1    | [36]    |
| <i>Castanea pumila</i>                        | Allegheny chinquapin     | Chestnut blight ( <i>Cryphonectria parasitica</i> )*       | D   | 10   | [86]    |
|                                               |                          | Phytophthora root rot ( <i>Phytophthora cinnamomi</i> )*   | D   | 5    | [86]    |
|                                               |                          | Twolined chestnut borer ( <i>Agrilus bilineatus</i> )      | I/B | 3    | [37]    |
|                                               |                          | Asiatic oak weevil ( <i>Cyrtopistomus castaneus</i> )*     | I/F | 1    | [86]    |
|                                               |                          | Oak wilt ( <i>Bretziella fagacearum</i> )*                 | D   | 1    | [34]    |
| <i>Castanea pumila</i> var. <i>ozarkensis</i> | Ozark chinquapin         | Chestnut blight ( <i>Cryphonectria parasitica</i> )*       | D   | 10   | [86]    |
|                                               |                          | Phytophthora root rot ( <i>Phytophthora cinnamomi</i> )*   | D   | 5    | [86]    |
|                                               |                          | Twolined chestnut borer ( <i>Agrilus bilineatus</i> )      | I/B | 3    | [37]    |
|                                               |                          | Asiatic oak weevil ( <i>Cyrtopistomus castaneus</i> )*     | I/F | 1    | [85,86] |
|                                               |                          | Chestnut gall wasp ( <i>Dryocosmus kuriphilus</i> )*       | I/F | 1    | [86]    |

T/G=Taxon/Guild. Taxon: I=insect, D=disease, P=parasitic plant, C=insect and disease multi-agent complex; Guild (for insects): B=phloem- or wood-borers, F=foliage-feeders, S=sap-feeders. Sev.=Severity. Nonnative invasive agents are indicated with \*.

| Host species scientific name                   | Host species common name | Agent                                                                             | T/G | Sev. | Sources |
|------------------------------------------------|--------------------------|-----------------------------------------------------------------------------------|-----|------|---------|
| <i>Catalpa bignonioides</i>                    | southern catalpa         | Verticillium wilt ( <i>Verticillium dahliae</i> )                                 | D   | 3    | [87]    |
|                                                |                          | Catalpa midge ( <i>Cecidomyia catalpae</i> )                                      | I/F | 1    | [87]    |
|                                                |                          | Catalpa sphinx moth ( <i>Ceratonia catalpae</i> )                                 | I/F | 1    | [87]    |
|                                                |                          | Decay ( <i>Trametes versicolor</i> )                                              | D   | 1    | [87]    |
| <i>Catalpa speciosa</i>                        | northern catalpa         | Verticillium wilt ( <i>Verticillium dahliae</i> )                                 | D   | 3    | [88]    |
|                                                |                          | Catalpa midge ( <i>Cecidomyia catalpae</i> )                                      | I/F | 1    | [88]    |
|                                                |                          | Catalpa sphinx moth ( <i>Ceratonia catalpae</i> )                                 | I/F | 1    | [88]    |
|                                                |                          | Decay ( <i>Trametes versicolor</i> )                                              | D   | 1    | [88]    |
| <i>Celtis laevigata</i>                        | sugarberry               | Basal canker and butt rot ( <i>Kretzschmaria deusta</i> )                         | D   | 1    | [36]    |
|                                                |                          | Eastern mistletoe ( <i>Phoradendron leucarpum</i> )                               | P   | 1    | [1]     |
|                                                |                          | Hackberry butterfly ( <i>Asterocampa celtis</i> )                                 | I/F | 1    | [1]     |
|                                                |                          | Hackberry witches-broom complex ( <i>Podospaera phytoptophila/Aceria celtis</i> ) | D   | 1    | [36]    |
| <i>Celtis laevigata</i> var. <i>reticulata</i> | netleaf hackberry        | Basal canker and butt rot ( <i>Kretzschmaria deusta</i> )                         | D   | 1    | [36]    |
|                                                |                          | Eastern mistletoe ( <i>Phoradendron leucarpum</i> )                               | P   | 1    | [36]    |
| <i>Celtis lindheimeri</i>                      | Lindheimer hackberry     | Basal canker and butt rot ( <i>Kretzschmaria deusta</i> )                         | D   | 1    | [36]    |
|                                                |                          | Eastern mistletoe ( <i>Phoradendron leucarpum</i> )                               | P   | 1    | [36]    |
| <i>Celtis occidentalis</i>                     | hackberry                | Bacterial leaf scorch ( <i>Xylella fastidiosa</i> )                               | D   | 1    | [44]    |
|                                                |                          | Eastern mistletoe ( <i>Phoradendron leucarpum</i> )                               | P   | 1    | [1]     |
|                                                |                          | Hackberry engraver ( <i>Scolytus muticus</i> )                                    | I/B | 1    | [1]     |
|                                                |                          | Hackberry nipplegall maker ( <i>Pachypsylla celtidismamma</i> *)                  | I/F | 1    | [1]     |
|                                                |                          | Hackberry witches-broom complex ( <i>Podospaera phytoptophila/Aceria celtis</i> ) | D   | 1    | [1,36]  |
| <i>Cercis canadensis</i>                       | eastern redbud           | Botryosphaeria canker ( <i>Botryosphaeria ribis</i> )                             | D   | 1    | [1]     |
|                                                |                          | Coral spot fungus ( <i>Nectria cinnabarina</i> )                                  | D   | 1    | [36]    |
|                                                |                          | Verticillium wilt ( <i>Verticillium albo-atrum</i> )                              | D   | 1    | [1]     |

T/G=Taxon/Guild. Taxon: I=insect, D=disease, P=parasitic plant, C=insect and disease multi-agent complex; Guild (for insects): B=phloem- or wood-borers, F=foliage-feeders, S=sap-feeders. Sev.=Severity. Nonnative invasive agents are indicated with \*.

| Host species scientific name    | Host species common name  | Agent                                                              | T/G | Sev. | Sources |
|---------------------------------|---------------------------|--------------------------------------------------------------------|-----|------|---------|
| <i>Cercocarpus ledifolius</i>   | curleaf mountain-mahogany | Geometrid moth ( <i>Stammodes animata</i> )*                       | I/F | 3    | [89]    |
|                                 |                           | Mountain mahogany bark beetle ( <i>Chaetophloeus heterodoxus</i> ) | I/B | 3    | [13]    |
|                                 |                           | Tent caterpillar ( <i>Malacosoma</i> spp.)                         | I/F | 3    | [11,37] |
|                                 |                           | Mountain-mahogany looper ( <i>Iridopsis clivinarina</i> )          | I/F | 1    | [7]     |
|                                 |                           | Wood-boring beetle ( <i>Dicerca horni</i> )                        | I/B | 1    | [11]    |
| <i>Chamaecyparis lawsoniana</i> | Port-Orford-cedar         | Port-Orford-cedar root disease ( <i>Phytophthora lateralis</i> )*  | D   | 10   | [1,90]  |
|                                 |                           | Phytophthora root rot ( <i>Phytophthora cinnamomi</i> )*           | D   | 5    | [7,13]  |
|                                 |                           | Juniper scale ( <i>Carulaspis juniperi</i> )*                      | I/S | 1    | [34]    |
|                                 |                           | Seiridium canker ( <i>Seiridium cardinale</i> )                    | D   | 1    | [36]    |
| <i>Chamaecyparis thyoides</i>   | Atlantic whitecedar       | Bagworm ( <i>Thyridopteryx ephemeraeformis</i> )                   | I/F | 1    | [1]     |
|                                 |                           | Heterobasidion root disease ( <i>Heterobasidion</i> spp.)          | D   | 1    | [34]    |
|                                 |                           | Juniper scale ( <i>Carulaspis juniperi</i> )*                      | I/S | 1    | [34]    |
|                                 |                           | Red-belted fungus ( <i>Fomitopsis pinicola</i> )                   | D   | 1    | [1]     |
|                                 |                           | Schweinitzii root and butt rot ( <i>Phaeolus schweinitzii</i> )    | D   | 1    | [1]     |
| <i>Chilopsis linearis</i>       | desert-willow             | none                                                               | .   | .    | .       |
| <i>Chionanthus virginicus</i>   | fringetree                | Emerald ash borer ( <i>Agrilus planipennis</i> )*                  | I/B | 3    | [91,92] |
| <i>Chrysolepis chrysophylla</i> | golden chinquapin         | Canker ( <i>Phytophthora cambivora</i> )                           | D   | 5    | [93]    |
|                                 |                           | Oak wilt ( <i>Bretziella fagacearum</i> )*                         | D   | 5    | [34]    |
|                                 |                           | Ganoderma rot of hardwoods ( <i>Ganoderma lucidum</i> )            | D   | 1    | [35]    |
|                                 |                           | White spongy rot ( <i>Phellinus igniarius</i> )                    | D   | 1    | [1]     |
| <i>Citharexylum fruticosum</i>  | Florida fiddlewood        | Cardin's whitefly ( <i>Metaleurodicus cardini</i> )*               | I/S | 1    | [94]    |
|                                 |                           | Fiddlewood leafroller ( <i>Epicorsia oedipodalis</i> )             | I/F | 1    | [95]    |
| <i>Cladrastis kentukea</i>      | yellowwood                | Verticillium wilt ( <i>Verticillium albo-atrum</i> )               | D   | 3    | [96]    |
| <i>Coccoloba diversifolia</i>   | tietongue                 | Fiddlewood leafroller ( <i>Epicorsia oedipodalis</i> )             | I/F | 1    | [95]    |
|                                 |                           | Ganoderma root and butt rot ( <i>Ganoderma australe</i> )          | D   | 1    | [36]    |
| <i>Coccothrinax argentata</i>   | Florida silver palm       | False smut of palms ( <i>Graphiloa phoenicis</i> )                 | D   | 3    | [36]    |

T/G=Taxon/Guild. Taxon: I=insect, D=disease, P=parasitic plant, C=insect and disease multi-agent complex; Guild (for insects): B=phloem- or wood-borers, F=foliage-feeders, S=sap-feeders. Sev.=Severity. Nonnative invasive agents are indicated with \*.

| Host species scientific name | Host species common name | Agent                                                              | T/G | Sev. | Sources   |
|------------------------------|--------------------------|--------------------------------------------------------------------|-----|------|-----------|
|                              |                          | Ganoderma butt rot ( <i>Ganoderma zonatum</i> )                    | D   | 1    | [36]      |
| <i>Colubrina elliptica</i>   | soldierwood              | none                                                               | .   | .    | .         |
| <i>Condalia hookeri</i>      | bluewood                 | none                                                               | .   | .    | .         |
| <i>Conocarpus erectus</i>    | button mangrove          | Lobate lac scale ( <i>Paratachardina pseudolobata</i> )*           | I/S | 1    | [97]      |
|                              |                          | Root rot ( <i>Cylindrocladium scoparium</i> )                      | D   | 1    | [36,98]   |
|                              |                          | Sri Lankan weevil ( <i>Myllocerus undecimpustulatus undatus</i> )* | I/F | 1    | [99]      |
| <i>Cordia boissieri</i>      | anacahuita               | none                                                               | .   | .    | .         |
| <i>Cordia sebestena</i>      | longleaf geigertree      | Geiger tortoise beetle ( <i>Eurypepla calochroma</i> )             | I/F | 1    | [100,101] |
|                              |                          | Tar spot ( <i>Diatractium cordianum</i> )                          | D   | 1    | [102]     |
| <i>Cornus drummondii</i>     | roughleaf dogwood        | Dogwood anthracnose ( <i>Discula destructiva</i> )*                | D   | 5    | [34]      |
| <i>Cornus florida</i>        | flowering dogwood        | Dogwood anthracnose ( <i>Discula destructiva</i> )*                | D   | 5    | [34,36]   |
|                              |                          | Dogwood borer ( <i>Synanthedon scitula</i> )                       | I/B | 3    | [1,103]   |
|                              |                          | Bacterial leaf scorch ( <i>Xylella fastidiosa</i> )                | D   | 1    | [44]      |
|                              |                          | Crown canker and root rot ( <i>Phytophthora cactorum</i> )         | D   | 1    | [1,36]    |
|                              |                          | Dogwood clubgall midge ( <i>Resseliella clavula</i> )              | I/F | 1    | [1]       |
| <i>Cornus nuttallii</i>      | Pacific dogwood          | Dogwood anthracnose ( <i>Discula destructiva</i> )*                | D   | 8    | [34,36]   |
|                              |                          | Crown canker and root rot ( <i>Phytophthora cactorum</i> )         | D   | 1    | [36]      |
|                              |                          | Madrone thrips ( <i>Thrips madronii</i> )                          | I/F | 1    | [13]      |
|                              |                          | Nectria canker ( <i>Nectria ditissima</i> )                        | D   | 1    | [13,35]   |
| <i>Cotinus obovatus</i>      | smoketree                | Verticillium wilt ( <i>Verticillium albo-atrum</i> )               | D   | 1    | [13,104]  |
| <i>Crataegus brainerdii</i>  | Brainerd's hawthorn      | Cherry bark tortrix ( <i>Enarmonia formosana</i> )*                | I/B | 3    | [34,105]  |
|                              |                          | Fire blight ( <i>Erwinia amylovora</i> )                           | D   | 1    | [106]     |
|                              |                          | Leaf blight and fruit rot ( <i>Monilinia johnsonii</i> )           | D   | 1    | [106]     |
|                              |                          | Rust ( <i>Gymnosporangium</i> spp.)                                | D   | 1    | [106]     |
|                              |                          | Winter moth ( <i>Operophtera brumata</i> )*                        | I/F | 1    | [34]      |

T/G=Taxon/Guild. Taxon: I=insect, D=disease, P=parasitic plant, C=insect and disease multi-agent complex; Guild (for insects): B=phloem- or wood-borers, F=foliage-feeders, S=sap-feeders. Sev.=Severity. Nonnative invasive agents are indicated with \*.

| Host species scientific name  | Host species common name | Agent                                                    | T/G | Sev. | Sources  |
|-------------------------------|--------------------------|----------------------------------------------------------|-----|------|----------|
| <i>Crataegus calpodendron</i> | pear hawthorn            | Cherry bark tortrix ( <i>Enarmonia formosana</i> )*      | I/B | 3    | [34,105] |
|                               |                          | Fire blight ( <i>Erwinia amylovora</i> )                 | D   | 1    | [107]    |
|                               |                          | Leaf blight and fruit rot ( <i>Monilinia johnsonii</i> ) | D   | 1    | [107]    |
|                               |                          | Rust ( <i>Gymnosporangium</i> spp.)                      | D   | 1    | [107]    |
|                               |                          | Winter moth ( <i>Operophtera brumata</i> )*              | I/F | 1    | [34]     |
| <i>Crataegus chrysoarpa</i>   | fireberry hawthorn       | Cherry bark tortrix ( <i>Enarmonia formosana</i> )*      | I/B | 3    | [34,105] |
|                               |                          | Fire blight ( <i>Erwinia amylovora</i> )                 | D   | 1    | [107]    |
|                               |                          | Leaf blight and fruit rot ( <i>Monilinia johnsonii</i> ) | D   | 1    | [107]    |
|                               |                          | Rust ( <i>Gymnosporangium</i> spp.)                      | D   | 1    | [107]    |
|                               |                          | Winter moth ( <i>Operophtera brumata</i> )*              | I/F | 1    | [34]     |
| <i>Crataegus crus-galli</i>   | cockspur hawthorn        | Cherry bark tortrix ( <i>Enarmonia formosana</i> )*      | I/B | 3    | [34,105] |
|                               |                          | Gypsy moth ( <i>Lymantria dispar dispar</i> )*           | I/F | 3    | [34,108] |
|                               |                          | Hawthorn rust ( <i>Gymnosporangium globosum</i> )        | D   | 1    | [109]    |
|                               |                          | Winter moth ( <i>Operophtera brumata</i> )*              | I/F | 1    | [34]     |
| <i>Crataegus dilatata</i>     | broadleaf hawthorn       | Cherry bark tortrix ( <i>Enarmonia formosana</i> )*      | I/B | 3    | [34,105] |
|                               |                          | Fire blight ( <i>Erwinia amylovora</i> )                 | D   | 1    | [110]    |
|                               |                          | Leaf blight and fruit rot ( <i>Monilinia johnsonii</i> ) | D   | 1    | [110]    |
|                               |                          | Rust ( <i>Gymnosporangium</i> spp.)                      | D   | 1    | [110]    |
|                               |                          | Winter moth ( <i>Operophtera brumata</i> )*              | I/F | 1    | [34]     |
| <i>Crataegus flabellata</i>   | fanleaf hawthorn         | Cherry bark tortrix ( <i>Enarmonia formosana</i> )*      | I/B | 3    | [34,105] |
|                               |                          | Fire blight ( <i>Erwinia amylovora</i> )                 | D   | 1    | [111]    |
|                               |                          | Leaf blight and fruit rot ( <i>Monilinia johnsonii</i> ) | D   | 1    | [111]    |
|                               |                          | Rust ( <i>Gymnosporangium</i> spp.)                      | D   | 1    | [111]    |
|                               |                          | Winter moth ( <i>Operophtera brumata</i> )*              | I/F | 1    | [34]     |
| <i>Crataegus mollis</i>       | downy hawthorn           | Cherry bark tortrix ( <i>Enarmonia formosana</i> )*      | I/B | 3    | [34,105] |

T/G=Taxon/Guild. Taxon: I=insect, D=disease, P=parasitic plant, C=insect and disease multi-agent complex; Guild (for insects): B=phloem- or wood-borers, F=foliage-feeders, S=sap-feeders. Sev.=Severity. Nonnative invasive agents are indicated with \*.

| Host species scientific name | Host species common name | Agent                                                                        | T/G | Sev. | Sources        |
|------------------------------|--------------------------|------------------------------------------------------------------------------|-----|------|----------------|
|                              |                          | Gypsy moth ( <i>Lymantria dispar dispar</i> )*                               | I/F | 3    | [34,108]       |
|                              |                          | Winter moth ( <i>Operophtera brumata</i> )*                                  | I/F | 1    | [34]           |
| <i>Crataegus pedicellata</i> | scarlet hawthorn         | Cherry bark tortrix ( <i>Enarmonia formosana</i> )*                          | I/B | 3    | [34,105]       |
|                              |                          | Fire blight ( <i>Erwinia amylovora</i> )                                     | D   | 1    | [107]          |
|                              |                          | Leaf blight and fruit rot ( <i>Monilinia johnsonii</i> )                     | D   | 1    | [107]          |
|                              |                          | Rust ( <i>Gymnosporangium</i> spp.)                                          | D   | 1    | [107]          |
|                              |                          | Winter moth ( <i>Operophtera brumata</i> )*                                  | I/F | 1    | [34]           |
| <i>Diospyros texana</i>      | Texas persimmon          | Verticillium wilt ( <i>Verticillium albo-atrum</i> )                         | D   | 3    | [36]           |
| <i>Diospyros virginiana</i>  | common persimmon         | Persimmon wilt ( <i>Acremonium diospyri</i> )                                | D   | 5    | [1,36]         |
|                              |                          | Verticillium wilt ( <i>Verticillium albo-atrum</i> )                         | D   | 3    | [36]           |
| <i>Ebenopsis ebano</i>       | blackbead ebony          | none                                                                         | .   | .    | .              |
| <i>Ehretia anacua</i>        | Anacua knockaway         | none                                                                         | .   | .    | .              |
| <i>Eugenia rhombea</i>       | red stopper              | none                                                                         | .   | .    | .              |
| <i>Exothea paniculata</i>    | butterbough              | none                                                                         | .   | .    | .              |
| <i>Fagus grandifolia</i>     | American beech           | Beech bark disease ( <i>Neonectria</i> spp./ <i>Cryptococcus fagisuga</i> )* | C   | 8    | [1,36,112,113] |
|                              |                          | White spongy rot ( <i>Phellinus igniarius</i> )                              | D   | 3    | [1,36]         |
|                              |                          | Armillaria root disease ( <i>Armillaria</i> spp.)                            | D   | 1    | [1]            |
|                              |                          | Artist's conk ( <i>Ganoderma applanatum</i> )                                | D   | 1    | [1,36]         |
|                              |                          | Forest tent caterpillar ( <i>Malacosoma disstria</i> )                       | I/F | 1    | [1]            |
| <i>Ficus aurea</i>           | Florida strangler fig    | Lobate lac scale ( <i>Paratachardina pseudolobata</i> )*                     | I/S | 8    | [97]           |
|                              |                          | Scale insect ( <i>Phalacrocooccus howertoni</i> )                            | I/S | 3    | [114]          |
|                              |                          | Edwards wasp moth ( <i>Lymire edwardsii</i> )                                | I/F | 1    | [115]          |
|                              |                          | Ficus whitefly ( <i>Singhiella simplex</i> )*                                | I/S | 1    | [116]          |
| <i>Ficus citrifolia</i>      | wild banyantree          | Lobate lac scale ( <i>Paratachardina pseudolobata</i> )*                     | I/S | 8    | [97]           |
|                              |                          | Scale insect ( <i>Phalacrocooccus howertoni</i> )                            | I/S | 3    | [114]          |

T/G=Taxon/Guild. Taxon: I=insect, D=disease, P=parasitic plant, C=insect and disease multi-agent complex; Guild (for insects): B=phloem- or wood-borers, F=foliage-feeders, S=sap-feeders. Sev.=Severity. Nonnative invasive agents are indicated with \*.



| Host species scientific name   | Host species common name | Agent                                                  | T/G | Sev. | Sources      |
|--------------------------------|--------------------------|--------------------------------------------------------|-----|------|--------------|
| <i>Frangula purshiana</i>      | cascara buckthorn        | Edwards wasp moth ( <i>Lymire edwardsii</i> )          | I/F | 1    | [115]        |
|                                |                          | Ficus whitefly ( <i>Singhiella simplex</i> )*          | I/S | 1    | [116]        |
|                                |                          | Hispidus canker ( <i>Inonotus hispidus</i> )           | D   | 1    | [36]         |
|                                |                          | Sudden oak death ( <i>Phytophthora ramorum</i> )*      | D   | 1    | [117]        |
| <i>Fraxinus americana</i>      | white ash                | Emerald ash borer ( <i>Agrilus planipennis</i> )*      | I/B | 10   | [34,35,118]  |
|                                |                          | Ash yellows (Candidatus <i>Phytoplasma fraxini</i> )   | D   | 5    | [36,119]     |
|                                |                          | Oystershell scale ( <i>Lepidosaphes ulmi</i> )*        | I/S | 3    | [34,35]      |
|                                |                          | Forest tent caterpillar ( <i>Malacosoma disstria</i> ) | I/F | 1    | [1]          |
| <i>Fraxinus berlandieriana</i> | Berlandier ash           | Verticillium wilt ( <i>Verticillium</i> spp.)          | D   | 1    | [35,120,121] |
|                                |                          | Emerald ash borer ( <i>Agrilus planipennis</i> )*      | I/B | 9    | [34,35]      |
|                                |                          | Ash yellows (Candidatus <i>Phytoplasma fraxini</i> )   | D   | 5    | [36]         |
|                                |                          | Oystershell scale ( <i>Lepidosaphes ulmi</i> )*        | I/S | 3    | [34,35]      |
| <i>Fraxinus caroliniana</i>    | Carolina ash             | Forest tent caterpillar ( <i>Malacosoma disstria</i> ) | I/F | 1    | [37]         |
|                                |                          | Emerald ash borer ( <i>Agrilus planipennis</i> )*      | I/B | 10   | [34,35]      |
|                                |                          | Ash yellows (Candidatus <i>Phytoplasma fraxini</i> )   | D   | 5    | [13]         |
|                                |                          | Oystershell scale ( <i>Lepidosaphes ulmi</i> )*        | I/S | 3    | [34,35]      |
| <i>Fraxinus cuspidata</i>      | fragrant ash             | Forest tent caterpillar ( <i>Malacosoma disstria</i> ) | I/F | 1    | [37]         |
|                                |                          | Emerald ash borer ( <i>Agrilus planipennis</i> )*      | I/B | 9    | [34,35]      |
|                                |                          | Ash yellows (Candidatus <i>Phytoplasma fraxini</i> )   | D   | 5    | [13]         |
|                                |                          | Oystershell scale ( <i>Lepidosaphes ulmi</i> )*        | I/S | 3    | [34,35]      |
| <i>Fraxinus dipetala</i>       | two-petal ash            | Forest tent caterpillar ( <i>Malacosoma disstria</i> ) | I/F | 1    | [37]         |
|                                |                          | Emerald ash borer ( <i>Agrilus planipennis</i> )*      | I/B | 8    | [34,35,118]  |
|                                |                          | Ash yellows (Candidatus <i>Phytoplasma fraxini</i> )   | D   | 5    | [13]         |
|                                |                          | Oystershell scale ( <i>Lepidosaphes ulmi</i> )*        | I/S | 3    | [34,35]      |
| <i>Fraxinus dipetala</i>       | two-petal ash            | Forest tent caterpillar ( <i>Malacosoma disstria</i> ) | I/F | 1    | [37]         |

T/G=Taxon/Guild. Taxon: I=insect, D=disease, P=parasitic plant, C=insect and disease multi-agent complex; Guild (for insects): B=phloem- or wood-borers, F=foliage-feeders, S=sap-feeders. Sev.=Severity. Nonnative invasive agents are indicated with \*.

| Host species scientific name  | Host species common name | Agent                                                  | T/G | Sev. | Sources     |
|-------------------------------|--------------------------|--------------------------------------------------------|-----|------|-------------|
| <i>Fraxinus greggii</i>       | Gregg ash                | Emerald ash borer ( <i>Agrilus planipennis</i> )*      | I/B | 9    | [34,35]     |
|                               |                          | Ash yellows (Candidatus <i>Phytoplasma fraxini</i> )   | D   | 5    | [13]        |
|                               |                          | Oystershell scale ( <i>Lepidosaphes ulmi</i> )*        | I/S | 3    | [34,35]     |
|                               |                          | Forest tent caterpillar ( <i>Malacosoma disstria</i> ) | I/F | 1    | [37]        |
| <i>Fraxinus latifolia</i>     | Oregon ash               | Emerald ash borer ( <i>Agrilus planipennis</i> )*      | I/B | 8    | [34,35]     |
|                               |                          | Ash yellows (Candidatus <i>Phytoplasma fraxini</i> )   | D   | 5    | [36]        |
|                               |                          | Oystershell scale ( <i>Lepidosaphes ulmi</i> )*        | I/S | 3    | [34,35]     |
|                               |                          | Forest tent caterpillar ( <i>Malacosoma disstria</i> ) | I/F | 1    | [37]        |
|                               |                          | Verticillium wilt ( <i>Verticillium</i> spp.)          | D   | 1    | [13]        |
| <i>Fraxinus nigra</i>         | black ash                | Emerald ash borer ( <i>Agrilus planipennis</i> )*      | I/B | 10   | [34,35,118] |
|                               |                          | Ash yellows (Candidatus <i>Phytoplasma fraxini</i> )   | D   | 5    | [119]       |
|                               |                          | Oystershell scale ( <i>Lepidosaphes ulmi</i> )*        | I/S | 3    | [34,35]     |
|                               |                          | Forest tent caterpillar ( <i>Malacosoma disstria</i> ) | I/F | 1    | [37]        |
|                               |                          | Nectria canker ( <i>Nectria ditissima</i> )            | D   | 1    | [1]         |
| <i>Fraxinus papillosa</i>     | Chihuahua ash            | Emerald ash borer ( <i>Agrilus planipennis</i> )*      | I/B | 9    | [34,35]     |
|                               |                          | Ash yellows (Candidatus <i>Phytoplasma fraxini</i> )   | D   | 5    | [13]        |
|                               |                          | Oystershell scale ( <i>Lepidosaphes ulmi</i> )*        | I/S | 3    | [34,35]     |
|                               |                          | Forest tent caterpillar ( <i>Malacosoma disstria</i> ) | I/F | 1    | [37]        |
| <i>Fraxinus pennsylvanica</i> | green ash                | Emerald ash borer ( <i>Agrilus planipennis</i> )*      | I/B | 10   | [34,35,118] |
|                               |                          | Ash yellows (Candidatus <i>Phytoplasma fraxini</i> )   | D   | 5    | [36]        |
|                               |                          | Oystershell scale ( <i>Lepidosaphes ulmi</i> )*        | I/S | 3    | [34,35]     |
|                               |                          | Forest tent caterpillar ( <i>Malacosoma disstria</i> ) | I/F | 1    | [37]        |
|                               |                          | Verticillium wilt ( <i>Verticillium dahliae</i> )      | D   | 1    | [36,122]    |
| <i>Fraxinus profunda</i>      | pumpkin ash              | Emerald ash borer ( <i>Agrilus planipennis</i> )*      | I/B | 10   | [34,35]     |
|                               |                          | Ash yellows (Candidatus <i>Phytoplasma fraxini</i> )   | D   | 5    | [36]        |

T/G=Taxon/Guild. Taxon: I=insect, D=disease, P=parasitic plant, C=insect and disease multi-agent complex; Guild (for insects): B=phloem- or wood-borers, F=foliage-feeders, S=sap-feeders. Sev.=Severity. Nonnative invasive agents are indicated with \*.

| Host species scientific name  | Host species common name | Agent                                                      | T/G | Sev. | Sources     |
|-------------------------------|--------------------------|------------------------------------------------------------|-----|------|-------------|
| <i>Fraxinus quadrangulata</i> | blue ash                 | Oystershell scale ( <i>Lepidosaphes ulmi</i> )*            | I/S | 3    | [34,35]     |
|                               |                          | Forest tent caterpillar ( <i>Malacosoma disstria</i> )     | I/F | 1    | [37]        |
|                               |                          | Emerald ash borer ( <i>Agrilus planipennis</i> )*          | I/B | 8    | [34,35,118] |
|                               |                          | Ash yellows (Candidatus <i>Phytoplasma fraxini</i> )       | D   | 5    | [36,119]    |
|                               |                          | Oystershell scale ( <i>Lepidosaphes ulmi</i> )*            | I/S | 3    | [34,35]     |
| <i>Fraxinus texensis</i>      | Texas ash                | Forest tent caterpillar ( <i>Malacosoma disstria</i> )     | I/F | 1    | [37]        |
|                               |                          | Verticillium wilt ( <i>Verticillium</i> spp.)              | D   | 1    | [121]       |
|                               |                          | Emerald ash borer ( <i>Agrilus planipennis</i> )*          | I/B | 9    | [34,35]     |
|                               |                          | Ash yellows (Candidatus <i>Phytoplasma fraxini</i> )       | D   | 5    | [36]        |
|                               |                          | Oystershell scale ( <i>Lepidosaphes ulmi</i> )*            | I/S | 3    | [34,35]     |
| <i>Fraxinus velutina</i>      | velvet ash               | Forest tent caterpillar ( <i>Malacosoma disstria</i> )     | I/F | 1    | [37]        |
|                               |                          | Emerald ash borer ( <i>Agrilus planipennis</i> )*          | I/B | 9    | [34,35]     |
|                               |                          | Ash yellows (Candidatus <i>Phytoplasma fraxini</i> )       | D   | 5    | [36,123]    |
| <i>Gleditsia aquatica</i>     | waterlocust              | Oystershell scale ( <i>Lepidosaphes ulmi</i> )*            | I/S | 3    | [34,35]     |
|                               |                          | Forest tent caterpillar ( <i>Malacosoma disstria</i> )     | I/F | 1    | [37]        |
|                               |                          | Calico scale ( <i>Eulecanium cerasorum</i> )*              | I/S | 1    | [34]        |
|                               |                          | Mimosa webworm ( <i>Homadula anisocentra</i> )*            | I/F | 1    | [1]         |
|                               |                          | Thyronectria canker ( <i>Pleonectria austroamericana</i> ) | D   | 1    | [1,35,36]   |
| <i>Gleditsia triacanthos</i>  | honeylocust              | Twig girdler ( <i>Oncideres cingulata</i> )                | I/B | 1    | [1]         |
|                               |                          | White mottled rot ( <i>Ganoderma</i> spp.)                 | D   | 1    | [1,36]      |
|                               |                          | Honeylocust agrilus ( <i>Agrilus difficilis</i> )          | I/B | 3    | [1]         |
|                               |                          | Calico scale ( <i>Eulecanium cerasorum</i> )*              | I/S | 1    | [34]        |
|                               |                          | Thyronectria canker ( <i>Pleonectria austroamericana</i> ) | D   | 1    | [1,35,36]   |
|                               |                          | Twig girdler ( <i>Oncideres cingulata</i> )                | I/B | 1    | [1]         |
|                               |                          | White mottled rot ( <i>Ganoderma</i> spp.)                 | D   | 1    | [1,36]      |

T/G=Taxon/Guild. Taxon: I=insect, D=disease, P=parasitic plant, C=insect and disease multi-agent complex; Guild (for insects): B=phloem- or wood-borers, F=foliage-feeders, S=sap-feeders. Sev.=Severity. Nonnative invasive agents are indicated with \*.

| Host species scientific name     | Host species common name | Agent                                               | T/G | Sev. | Sources      |
|----------------------------------|--------------------------|-----------------------------------------------------|-----|------|--------------|
| <i>Gordonia lasianthus</i>       | loblolly bay             | none                                                | .   | .    | .            |
| <i>Guapira discolor</i>          | beefree                  | none                                                | .   | .    | .            |
| <i>Gymnocladus dioicus</i>       | Kentucky coffeetree      | Verticillium wilt ( <i>Verticillium</i> spp.)       | D   | 1    | [36]         |
|                                  |                          | White mottled rot ( <i>Ganoderma</i> spp.)          | D   | 1    | [36]         |
| <i>Halesia carolina</i>          | Carolina silverbell      | none                                                | .   | .    | .            |
| <i>Halesia diptera</i>           | two-wing silverbell      | none                                                | .   | .    | .            |
| <i>Halesia parviflora</i>        | little silverbell        | none                                                | .   | .    | .            |
| <i>Helietta parvifolia</i>       | barreta                  | none                                                | .   | .    | .            |
| <i>Hesperocyparis abramsiana</i> | Santa Cruz cypress       | Seiridium canker ( <i>Seiridium cardinale</i> )     | D   | 1    | [13]         |
| <i>Hesperocyparis arizonica</i>  | Arizona cypress          | Cercospora blight ( <i>Asperisporium sequoiae</i> ) | D   | 5    | [36,124,125] |
|                                  |                          | Cedar bark beetle ( <i>Phloeosinus</i> spp.)        | I/B | 3    | [11]         |
|                                  |                          | Seiridium canker ( <i>Seiridium cardinale</i> )     | D   | 3    | [36]         |
|                                  |                          | Juniper scale ( <i>Carulaspis juniperi</i> )*       | I/S | 1    | [34]         |
|                                  |                          | Rust ( <i>Gymnosporangium cunninghamianum</i> )     | D   | 1    | [36]         |
| <i>Hesperocyparis bakeri</i>     | Baker cypress            | Seiridium canker ( <i>Seiridium cardinale</i> )     | D   | 3    | [36]         |
|                                  |                          | Mistletoe ( <i>Phoradendron bolleanum</i> )         | P   | 1    | [126]        |
|                                  |                          | Rust ( <i>Gymnosporangium cunninghamianum</i> )     | D   | 1    | [36]         |
| <i>Hesperocyparis forbesii</i>   | Tecate cypress           | Cercospora blight ( <i>Asperisporium sequoiae</i> ) | D   | 5    | [36,124]     |
|                                  |                          | Seiridium canker ( <i>Seiridium cardinale</i> )     | D   | 3    | [36]         |
|                                  |                          | Juniper scale ( <i>Carulaspis juniperi</i> )*       | I/S | 1    | [34]         |
|                                  |                          | Rust ( <i>Gymnosporangium cunninghamianum</i> )     | D   | 1    | [36]         |
| <i>Hesperocyparis goveniana</i>  | Gowen cypress            | Seiridium canker ( <i>Seiridium cardinale</i> )     | D   | 3    | [36]         |
|                                  |                          | Mistletoe ( <i>Phoradendron bolleanum</i> )         | P   | 1    | [126]        |
| <i>Hesperocyparis macnabiana</i> | Macnab's cypress         | Mistletoe ( <i>Phoradendron bolleanum</i> )         | P   | 1    | [126]        |
|                                  |                          | Seiridium canker ( <i>Seiridium cardinale</i> )     | D   | 1    | [36]         |

T/G=Taxon/Guild. Taxon: I=insect, D=disease, P=parasitic plant, C=insect and disease multi-agent complex; Guild (for insects): B=phloem- or wood-borers, F=foliage-feeders, S=sap-feeders. Sev.=Severity. Nonnative invasive agents are indicated with \*.

| Host species scientific name       | Host species common name         | Agent                                                                          | T/G | Sev. | Sources   |
|------------------------------------|----------------------------------|--------------------------------------------------------------------------------|-----|------|-----------|
| <i>Hesperocyparis macrocarpa</i>   | Monterey cypress                 | Cercospora blight ( <i>Asperisporium sequoiae</i> )                            | D   | 5    | [36,124]  |
|                                    |                                  | Seiridium canker ( <i>Seiridium cardinale</i> )                                | D   | 5    | [36]      |
| <i>Hesperocyparis nevadensis</i>   | Paiute cypress                   | Seiridium canker ( <i>Seiridium cardinale</i> )                                | D   | 3    | [36]      |
|                                    |                                  | Mistletoe ( <i>Phoradendron bolleanum</i> )                                    | P   | 1    | [36]      |
| <i>Hesperocyparis sargentii</i>    | Sargent's cypress                | Mistletoe ( <i>Phoradendron bolleanum</i> )                                    | P   | 1    | [126]     |
|                                    |                                  | Seiridium canker ( <i>Seiridium cardinale</i> )                                | D   | 1    | [7]       |
| <i>Hesperocyparis stephensonii</i> | Cuyamaca cypress                 | Seiridium canker ( <i>Seiridium cardinale</i> )                                | D   | 3    | [36]      |
|                                    |                                  | Mistletoe ( <i>Phoradendron bolleanum</i> )                                    | P   | 1    | [36]      |
| <i>Hippomane mancinella</i>        | manchineel                       | none                                                                           | .   | .    | .         |
| <i>Ilex cassine</i>                | dahoon                           | Florida wax scale ( <i>Ceroplastes floridensis</i> )                           | I/S | 3    | [127]     |
| <i>Ilex montana</i>                | mountain winterberry             | none                                                                           | .   | .    | .         |
| <i>Ilex myrtifolia</i>             | myrtle dahoon                    | none                                                                           | .   | .    | .         |
| <i>Ilex opaca</i>                  | American holly                   | Florida wax scale ( <i>Ceroplastes floridensis</i> )                           | I/S | 3    | [127]     |
|                                    |                                  | Black root rot ( <i>Thielaviopsis basicola</i> )                               | D   | 1    | [36]      |
| <i>Juglans californica</i>         | southern California black walnut | Thousand cankers disease ( <i>Geosmithia morbida/Pityophthorus juglandis</i> ) | D   | 3    | [128,129] |
| <i>Juglans cinerea</i>             | butternut                        | Butternut canker ( <i>Sirococcus clavignenti-juglandacearum</i> )*             | D   | 10   | [1,34]    |
|                                    |                                  | Thousand cankers disease ( <i>Geosmithia morbida/Pityophthorus juglandis</i> ) | D   | 5    | [128,129] |
|                                    |                                  | Bunch disease (Phytoplasma strains in subgroup of Prunus X-disease group)      | D   | 1    | [1,36]    |
| <i>Juglans hindsii</i>             | northern California black walnut | Blackline (Cherry leafroll virus)                                              | D   | 5    | [36]      |
|                                    |                                  | Thousand cankers disease ( <i>Geosmithia morbida/Pityophthorus juglandis</i> ) | D   | 3    | [128,129] |
| <i>Juglans hindsii</i>             | northern California black walnut | Sooty canker ( <i>Fusicoccum mangiferum</i> )                                  | D   | 1    | [36]      |
| <i>Juglans major</i>               | Arizona walnut                   | Thousand cankers disease ( <i>Geosmithia morbida/Pityophthorus juglandis</i> ) | D   | 1    | [128-130] |
|                                    |                                  | White rot ( <i>Phellinus weirianus</i> )                                       | D   | 1    | [36]      |
| <i>Juglans microcarpa</i>          | Texas walnut                     | Bunch disease (Phytoplasma strains in subgroup of Prunus X-disease group)      | D   | 3    | [36]      |

T/G=Taxon/Guild. Taxon: I=insect, D=disease, P=parasitic plant, C=insect and disease multi-agent complex; Guild (for insects): B=phloem- or wood-borers, F=foliage-feeders, S=sap-feeders. Sev.=Severity. Nonnative invasive agents are indicated with \*.

| Host species scientific name  | Host species common name | Agent                                                                                   | T/G | Sev. | Sources      |
|-------------------------------|--------------------------|-----------------------------------------------------------------------------------------|-----|------|--------------|
| <i>Juglans nigra</i>          | black walnut             | Thousand cankers disease ( <i>Geosmithia morbida</i> / <i>Pityophthorus juglandis</i> ) | D   | 3    | [128-130]    |
|                               |                          | Thousand cankers disease ( <i>Geosmithia morbida</i> / <i>Pityophthorus juglandis</i> ) | D   | 5    | [128,129]    |
|                               |                          | Nectria canker ( <i>Nectria ditissima</i> )                                             | D   | 3    | [1]          |
|                               |                          | Black stem borer ( <i>Xylosandrus germanus</i> )*                                       | I/B | 1    | [1]          |
|                               |                          | Flatheaded apple tree borer ( <i>Chrysobothris femorata</i> )                           | I/B | 1    | [1]          |
| <i>Juniperus ashei</i>        | Ashe juniper             | Walnut caterpillar ( <i>Datana integerrima</i> )                                        | I/F | 1    | [1,131]      |
|                               |                          | Bagworm ( <i>Thyridopteryx ephemeraeformis</i> )                                        | I/F | 1    | [35,132,133] |
| <i>Juniperus californica</i>  | California juniper       | Juniper scale ( <i>Carulaspis juniperi</i> )*                                           | I/S | 1    | [34]         |
| <i>Juniperus coahuilensis</i> | redberry juniper         | Juniper scale ( <i>Carulaspis juniperi</i> )*                                           | I/S | 1    | [34]         |
| <i>Juniperus deppeana</i>     | alligator juniper        | Juniper scale ( <i>Carulaspis juniperi</i> )*                                           | I/S | 1    | [34]         |
| <i>Juniperus flaccida</i>     | drooping juniper         | Bagworm ( <i>Thyridopteryx ephemeraeformis</i> )                                        | I/F | 1    | [35,132]     |
| <i>Juniperus monosperma</i>   | oneseed juniper          | Juniper mistletoe ( <i>Phoradendron juniperinum</i> )                                   | P   | 1    | [7]          |
|                               |                          | Black-horned juniper borer ( <i>Callidium texanum</i> )                                 | I/B | 1    | [12]         |
|                               |                          | Cedar bark beetle ( <i>Phloeosinus</i> spp.)                                            | I/B | 1    | [11,134]     |
|                               |                          | Juniper borer ( <i>Atimia huachucae</i> )                                               | I/B | 1    | [12]         |
|                               |                          | Juniper mistletoe ( <i>Phoradendron juniperinum</i> )                                   | P   | 1    | [36]         |
| <i>Juniperus occidentalis</i> | western juniper          | Juniper twig pruner ( <i>Styloxus bicolor</i> )                                         | I/B | 1    | [12]         |
|                               |                          | Cedar bark beetle ( <i>Phloeosinus</i> spp.)                                            | I/B | 3    | [11]         |
|                               |                          | Heterobasidion root disease P-type ( <i>Heterobasidion irregulare</i> )                 | D   | 3    | [135]        |
|                               |                          | Juniper mistletoe ( <i>Phoradendron juniperinum</i> )                                   | P   | 1    | [36]         |
|                               |                          | Juniper pocket rot ( <i>Pyrofomes demidoffii</i> )                                      | D   | 1    | [1]          |
| <i>Juniperus osteosperma</i>  | Utah juniper             | Juniper scale ( <i>Carulaspis juniperi</i> )*                                           | I/S | 1    | [34]         |
|                               |                          | Cedar bark beetle ( <i>Phloeosinus</i> spp.)                                            | I/B | 1    | [11]         |
|                               |                          | Juniper mistletoe ( <i>Phoradendron juniperinum</i> )                                   | P   | 1    | [36]         |

T/G=Taxon/Guild. Taxon: I=insect, D=disease, P=parasitic plant, C=insect and disease multi-agent complex; Guild (for insects): B=phloem- or wood-borers, F=foliage-feeders, S=sap-feeders. Sev.=Severity. Nonnative invasive agents are indicated with \*.

| Host species scientific name                       | Host species common name | Agent                                                                   | T/G | Sev. | Sources   |
|----------------------------------------------------|--------------------------|-------------------------------------------------------------------------|-----|------|-----------|
|                                                    |                          | Juniper pocket rot ( <i>Pyrofomes demidoffii</i> )                      | D   | 1    | [136,137] |
|                                                    |                          | Juniper scale ( <i>Carulaspis juniperi</i> )*                           | I/S | 1    | [34]      |
|                                                    |                          | Rust ( <i>Gymnosporangium</i> spp.)                                     | D   | 1    | [1]       |
| <i>Juniperus pinchotii</i>                         | Pinchot juniper          | Juniper scale ( <i>Carulaspis juniperi</i> )*                           | I/S | 1    | [34]      |
| <i>Juniperus scopulorum</i>                        | Rocky Mountain juniper   | Cedar bark beetle ( <i>Phloeosinus</i> spp.)                            | I/B | 3    | [11]      |
|                                                    |                          | Cercospora blight of juniper ( <i>Pseudocercospora juniperi</i> )       | D   | 3    | [36,124]  |
|                                                    |                          | Juniper mistletoe ( <i>Phoradendron juniperinum</i> )                   | P   | 1    | [36]      |
|                                                    |                          | Juniper scale ( <i>Carulaspis juniperi</i> )*                           | I/S | 1    | [34]      |
|                                                    |                          | Rust ( <i>Gymnosporangium</i> spp.)                                     | D   | 1    | [1]       |
| <i>Juniperus virginiana</i>                        | eastern redcedar         | Cercospora blight of juniper ( <i>Pseudocercospora juniperi</i> )       | D   | 3    | [36,124]  |
|                                                    |                          | Heterobasidion root disease P-type ( <i>Heterobasidion irregulare</i> ) | D   | 3    | [1]       |
|                                                    |                          | Phytophthora root rot ( <i>Phytophthora cinnamomi</i> )*                | D   | 3    | [34]      |
|                                                    |                          | Eastern juniper bark beetle ( <i>Phloeosinus dentatus</i> )             | I/B | 1    | [1]       |
|                                                    |                          | Juniper scale ( <i>Carulaspis juniperi</i> )*                           | I/S | 1    | [1]       |
| <i>Juniperus virginiana</i> var. <i>silicicola</i> | southern redcedar        | Cercospora blight of juniper ( <i>Pseudocercospora juniperi</i> )       | D   | 3    | [36,124]  |
|                                                    |                          | Heterobasidion root disease P-type ( <i>Heterobasidion irregulare</i> ) | D   | 3    | [1]       |
|                                                    |                          | Phytophthora root rot ( <i>Phytophthora cinnamomi</i> )*                | D   | 3    | [34]      |
|                                                    |                          | Eastern juniper bark beetle ( <i>Phloeosinus dentatus</i> )             | I/B | 1    | [1]       |
|                                                    |                          | Juniper scale ( <i>Carulaspis juniperi</i> )*                           | I/S | 1    | [1]       |
| <i>Laguncularia racemosa</i>                       | white-mangrove           | none                                                                    | .   | .    | .         |
| <i>Larix laricina</i>                              | tamarack                 | Larch casebearer ( <i>Coleophora laricella</i> )*                       | I/F | 5    | [1]       |
|                                                    |                          | Larch sawfly ( <i>Pristiphora erichsonii</i> )                          | I/F | 5    | [1]       |
|                                                    |                          | Gypsy moth ( <i>Lymantria dispar dispar</i> )*                          | I/F | 3    | [34]      |
|                                                    |                          | Spruce budworm ( <i>Choristoneura fumiferana</i> )                      | I/F | 3    | [1]       |
|                                                    |                          | European larch canker ( <i>Lachnellula willkommii</i> )*                | D   | 1    | [36]      |
| <i>Larix lyallii</i>                               | subalpine larch          | Heterobasidion root disease P-type ( <i>Heterobasidion irregulare</i> ) | D   | 3    | [36]      |

T/G=Taxon/Guild. Taxon: I=insect, D=disease, P=parasitic plant, C=insect and disease multi-agent complex; Guild (for insects): B=phloem- or wood-borers, F=foliage-feeders, S=sap-feeders. Sev.=Severity. Nonnative invasive agents are indicated with \*.

| Host species scientific name    | Host species common name | Agent                                                   | T/G | Sev. | Sources        |
|---------------------------------|--------------------------|---------------------------------------------------------|-----|------|----------------|
| <i>Larix occidentalis</i>       | western larch            | Brown trunk rot ( <i>Fomitopsis officinalis</i> )       | D   | 1    | [1]            |
|                                 |                          | Larch needle blight ( <i>Hypodermella laricis</i> )     | D   | 1    | [7]            |
|                                 |                          | Larch sawfly ( <i>Pristiphora erichsonii</i> )          | I/F | 1    | [34]           |
|                                 |                          | Larch dwarf mistletoe ( <i>Arceuthobium laricis</i> )   | P   | 5    | [36]           |
|                                 |                          | Armillaria root disease ( <i>Armillaria</i> spp.)       | D   | 3    | [36,138]       |
|                                 |                          | Larch casebearer ( <i>Coleophora laricella</i> )*       | I/F | 3    | [1]            |
|                                 |                          | Larch sawfly ( <i>Pristiphora erichsonii</i> )          | I/F | 3    | [1]            |
| <i>Leucaena pulverulenta</i>    | great leadtree           | none                                                    | .   | .    | .              |
| <i>Liquidambar styraciflua</i>  | sweetgum                 | Botryosphaeria canker ( <i>Botryosphaeria ribis</i> )   | D   | 1    | [13,36]        |
|                                 |                          | Calico scale ( <i>Eulecanium cerasorum</i> )*           | I/S | 1    | [34]           |
|                                 |                          | Forest tent caterpillar ( <i>Malacosoma disstria</i> )  | I/F | 1    | [1,35,139,140] |
|                                 |                          | Ganoderma rot of hardwoods ( <i>Ganoderma lucidum</i> ) | D   | 1    | [1]            |
|                                 |                          | Gypsy moth ( <i>Lymantria dispar dispar</i> )*          | I/F | 1    | [34]           |
| <i>Liriodendron tulipifera</i>  | yellow-poplar            | Stem canker ( <i>Fusarium solani</i> )                  | D   | 1    | [1]            |
|                                 |                          | Tuliptree scale ( <i>Toumeyella liriodendri</i> )       | I/S | 1    | [1]            |
|                                 |                          | Verticillium wilt ( <i>Verticillium</i> spp.)           | D   | 1    | [36]           |
|                                 |                          | Yellow poplar weevil ( <i>Odontopus calceatus</i> )     | I/F | 1    | [1]            |
|                                 |                          | Sudden oak death ( <i>Phytophthora ramorum</i> )*       | D   | 10   | [36]           |
| <i>Lithocarpus densiflorus</i>  | tanoak                   | California oakworm ( <i>Phryganidia californica</i> )   | I/F | 1    | [1]            |
|                                 |                          | Canker-rot ( <i>Inonotus</i> spp.)                      | D   | 1    | [1]            |
|                                 |                          | none                                                    | .   | .    | .              |
| <i>Lyonothamnus floribundus</i> | Catalina ironwood        | none                                                    | .   | .    | .              |
| <i>Lysiloma latisiliquum</i>    | false tamarind           | Ganoderma rot of hardwoods ( <i>Ganoderma lucidum</i> ) | D   | 1    | [36]           |
|                                 |                          | Lac scale ( <i>Tachardiella mexicana</i> )              | I/S | 1    | [141]          |
|                                 |                          | Nectriella gall ( <i>Nectriella pironii</i> )           | D   | 1    | [36]           |
| <i>Lysiloma watsonii</i>        | littleleaf lysiloma      | none                                                    | .   | .    | .              |

T/G=Taxon/Guild. Taxon: I=insect, D=disease, P=parasitic plant, C=insect and disease multi-agent complex; Guild (for insects): B=phloem- or wood-borers, F=foliage-feeders, S=sap-feeders. Sev.=Severity. Nonnative invasive agents are indicated with \*.



| Host species scientific name | Host species common name | Agent                                                 | T/G | Sev. | Sources |
|------------------------------|--------------------------|-------------------------------------------------------|-----|------|---------|
| <i>Maclura pomifera</i>      | Osage-orange             | Cotton root rot ( <i>Phymatotrichopsis omnivora</i> ) | D   | 1    | [1]     |
|                              |                          | Eastern mistletoe ( <i>Phoradendron leucarpum</i> )   | P   | 1    | [1]     |
|                              |                          | Verticillium wilt ( <i>Verticillium albo-atrum</i> )  | D   | 1    | [1]     |
| <i>Magnolia acuminata</i>    | cucumbertree             | Magnolia scale ( <i>Neolecanium cornuparvum</i> )     | I/S | 1    | [1]     |
|                              |                          | Nectria canker ( <i>Nectria ditissima</i> )           | D   | 1    | [1]     |
| <i>Magnolia ashei</i>        | Ashe's magnolia          | none                                                  | .   | .    | .       |
| <i>Magnolia fraseri</i>      | mountain magnolia        | Magnolia scale ( <i>Neolecanium cornuparvum</i> )     | I/S | 1    | [1]     |
|                              |                          | Nectria canker ( <i>Nectria magnoliae</i> )           | D   | 1    | [1]     |
| <i>Magnolia grandiflora</i>  | Southern magnolia        | Magnolia scale ( <i>Neolecanium cornuparvum</i> )     | I/S | 1    | [1]     |
|                              |                          | Tuliptree scale ( <i>Toumeyella liriodendri</i> )     | I/S | 1    | [1]     |
|                              |                          | Verticillium wilt ( <i>Verticillium albo-atrum</i> )  | D   | 1    | [142]   |
| <i>Magnolia macrophylla</i>  | bigleaf magnolia         | none                                                  | .   | .    | .       |
| <i>Magnolia pyramidata</i>   | pyramid magnolia         | none                                                  | .   | .    | .       |
| <i>Magnolia tripetala</i>    | umbrella magnolia        | none                                                  | .   | .    | .       |
| <i>Magnolia virginiana</i>   | sweetbay                 | none                                                  | .   | .    | .       |
| <i>Malus angustifolia</i>    | southern crabapple       | Apple scab ( <i>Venturia inaequalis</i> )             | D   | 1    | [36]    |
|                              |                          | Fire blight ( <i>Erwinia amylovora</i> )              | D   | 1    | [143]   |
| <i>Malus coronaria</i>       | sweet crabapple          | Apple scab ( <i>Venturia inaequalis</i> )             | D   | 1    | [36]    |
|                              |                          | Blister canker ( <i>Biscogniauxia marginata</i> )     | D   | 1    | [36]    |
| <i>Malus fusca</i>           | Oregon crab apple        | Apple mosaic virus (ApMV)                             | D   | 1    | [36]    |
|                              |                          | Apple scab ( <i>Venturia inaequalis</i> )             | D   | 1    | [36]    |
| <i>Malus ioensis</i>         | prairie crabapple        | Apple mosaic virus (ApMV)                             | D   | 1    | [36]    |
|                              |                          | Apple scab ( <i>Venturia inaequalis</i> )             | D   | 1    | [36]    |
| <i>Metopium toxiferum</i>    | Florida poison tree      | none                                                  | .   | .    | .       |
| <i>Morus microphylla</i>     | Texas mulberry           | Bacterial leaf scorch ( <i>Xylella fastidiosa</i> )   | D   | 1    | [36]    |

T/G=Taxon/Guild. Taxon: I=insect, D=disease, P=parasitic plant, C=insect and disease multi-agent complex; Guild (for insects): B=phloem- or wood-borers, F=foliage-feeders, S=sap-feeders. Sev.=Severity. Nonnative invasive agents are indicated with \*.

| Host species scientific name | Host species common name | Agent                                                       | T/G | Sev. | Sources |
|------------------------------|--------------------------|-------------------------------------------------------------|-----|------|---------|
| <i>Morus rubra</i>           | red mulberry             | Pink hibiscus mealybug ( <i>Maconellicoccus hirsutus</i> )* | I/S | 1    | [34]    |
|                              |                          | Bacterial leaf scorch ( <i>Xylella fastidiosa</i> )         | D   | 1    | [36]    |
| <i>Nyssa aquatica</i>        | water tupelo             | Pink hibiscus mealybug ( <i>Maconellicoccus hirsutus</i> )* | I/S | 1    | [34]    |
|                              |                          | Forest tent caterpillar ( <i>Malacosoma disstria</i> )      | I/F | 1    | [1]     |
| <i>Nyssa biflora</i>         | swamp tupelo             | Stem canker ( <i>Fusarium solani</i> )                      | D   | 1    | [36]    |
|                              |                          | Tupelo leafminer ( <i>Antispila nysaefoliella</i> )         | I/F | 1    | [1]     |
| <i>Nyssa ogeche</i>          | Ogeechee tupelo          | Forest tent caterpillar ( <i>Malacosoma disstria</i> )      | I/F | 1    | [144]   |
|                              |                          | Stem canker ( <i>Fusarium solani</i> )                      | D   | 1    | [144]   |
| <i>Nyssa sylvatica</i>       | blackgum                 | Tupelo leafminer ( <i>Antispila nysaefoliella</i> )         | I/F | 1    | [1]     |
|                              |                          | Forest tent caterpillar ( <i>Malacosoma disstria</i> )      | I/F | 1    | [35]    |
| <i>Oliveya tesota</i>        | desert ironwood          | Stem canker ( <i>Fusarium solani</i> )                      | D   | 1    | [13,35] |
|                              |                          | Tupelo leafminer ( <i>Antispila nysaefoliella</i> )         | I/F | 1    | [1]     |
| <i>Osmanthus americanus</i>  | devilwood                | Forest tent caterpillar ( <i>Malacosoma disstria</i> )      | I/F | 1    | [1]     |
|                              |                          | Stem canker ( <i>Fusarium solani</i> )                      | D   | 1    | [1]     |
| <i>Ostrya chisosensis</i>    | Chisos hophornbeam       | Tupelo leafminer ( <i>Antispila nysaefoliella</i> )         | I/F | 1    | [1]     |
| <i>Ostrya knowltonii</i>     | Knowlton's hophornbeam   | Mistletoe ( <i>Phoradendron californicum</i> )              | P   | 1    | [36]    |
| <i>Ostrya virginiana</i>     | eastern hophornbeam      | none                                                        | .   | .    | .       |
| <i>Oxydendrum arboreum</i>   | sourwood                 | Gypsy moth ( <i>Lymantria dispar dispar</i> )*              | I/F | 3    | [34]    |
|                              |                          | Black twig borer ( <i>Xylosandrus compactus</i> )*          | I/B | 1    | [145]   |
|                              |                          | Dogwood twig borer ( <i>Oberea tripunctata</i> )            | I/B | 1    | [1]     |
|                              |                          | Nectria canker ( <i>Nectria ditissima</i> )                 | D   | 1    | [36]    |
|                              |                          | Rhododendron stem borer ( <i>Oberea myops</i> )             | I/B | 1    | [146]   |
|                              |                          | Twig girdler ( <i>Oncideres cingulata</i> )                 | I/B | 1    | [1]     |

T/G=Taxon/Guild. Taxon: I=insect, D=disease, P=parasitic plant, C=insect and disease multi-agent complex; Guild (for insects): B=phloem- or wood-borers, F=foliage-feeders, S=sap-feeders. Sev.=Severity. Nonnative invasive agents are indicated with \*.

| Host species scientific name                | Host species common name | Agent                                                                                             | T/G | Sev. | Sources   |
|---------------------------------------------|--------------------------|---------------------------------------------------------------------------------------------------|-----|------|-----------|
| <i>Parkinsonia aculeata</i>                 | Jerusalem-thorn          | Mistletoe ( <i>Phoradendron californicum</i> )                                                    | P   | 1    | [36]      |
|                                             |                          | White mottled rot ( <i>Ganoderma</i> spp.)                                                        | D   | 1    | [36]      |
| <i>Parkinsonia florida</i>                  | blue paloverde           | Mistletoe ( <i>Phoradendron californicum</i> )                                                    | P   | 1    | [36]      |
|                                             |                          | Palo verde root borers ( <i>Derobrachus geminatus</i> )                                           | I/B | 1    | [147,148] |
|                                             |                          | White mottled rot ( <i>Ganoderma</i> spp.)                                                        | D   | 1    | [36]      |
| <i>Parkinsonia texana</i> var. <i>macra</i> | border paloverde         | Mistletoe ( <i>Phoradendron californicum</i> )                                                    | P   | 1    | [36]      |
|                                             |                          | White mottled rot ( <i>Ganoderma</i> spp.)                                                        | D   | 1    | [36]      |
| <i>Persea borbonia</i>                      | redbay                   | Laurel wilt ( <i>Raffaelea lauricola</i> )/redbay ambrosia beetle ( <i>Xyleborus glabratus</i> )* | C   | 10   | [34,149]  |
|                                             |                          | Black twig borer ( <i>Xylosandrus compactus</i> )*                                                | I/B | 1    | [145]     |
|                                             |                          | Lobate lac scale ( <i>Paratachardina pseudolobata</i> )*                                          | I/S | 1    | [97]      |
| <i>Picea breweriana</i>                     | Brewer spruce            | Spruce beetle ( <i>Dendroctonus rufipennis</i> )                                                  | I/B | 5    | [37]      |
|                                             |                          | Heterobasidion root disease ( <i>Heterobasidion</i> spp.)                                         | D   | 3    | [1]       |
|                                             |                          | White pine weevil ( <i>Pissodes strobi</i> )                                                      | I/B | 3    | [37]      |
|                                             |                          | Dwarf mistletoe ( <i>Arceuthobium</i> spp.)                                                       | P   | 1    | [1,36]    |
| <i>Picea engelmannii</i>                    | Engelmann spruce         | Spruce beetle ( <i>Dendroctonus rufipennis</i> )                                                  | I/B | 8    | [1,37]    |
|                                             |                          | Western spruce budworm ( <i>Choristoneura freemani</i> )                                          | I/F | 5    | [1]       |
|                                             |                          | Armillaria root disease ( <i>Armillaria</i> spp.)                                                 | D   | 3    | [35,150]  |
|                                             |                          | Red root and butt rot ( <i>Onnia tomentosa</i> )                                                  | D   | 3    | [12]      |
|                                             |                          | Western spruce dwarf mistletoe ( <i>Arceuthobium microcarpum</i> )                                | P   | 3    | [1]       |
| <i>Picea glauca</i>                         | white spruce             | Spruce beetle ( <i>Dendroctonus rufipennis</i> )                                                  | I/B | 5    | [37]      |
|                                             |                          | Western spruce budworm ( <i>Choristoneura freemani</i> )                                          | I/F | 5    | [37]      |
|                                             |                          | Eastern dwarf mistletoe ( <i>Arceuthobium pusillum</i> )                                          | P   | 3    | [1]       |
|                                             |                          | White pine weevil ( <i>Pissodes strobi</i> )                                                      | I/B | 3    | [37]      |
|                                             |                          | Red root and butt rot ( <i>Onnia tomentosa</i> )                                                  | D   | 1    | [36]      |
| <i>Picea mariana</i>                        | black spruce             | Spruce beetle ( <i>Dendroctonus rufipennis</i> )                                                  | I/B | 5    | [1]       |

T/G=Taxon/Guild. Taxon: I=insect, D=disease, P=parasitic plant, C=insect and disease multi-agent complex; Guild (for insects): B=phloem- or wood-borers, F=foliage-feeders, S=sap-feeders. Sev.=Severity. Nonnative invasive agents are indicated with \*.

| Host species scientific name | Host species common name        | Agent                                                              | T/G | Sev. | Sources    |
|------------------------------|---------------------------------|--------------------------------------------------------------------|-----|------|------------|
| <i>Picea pungens</i>         | blue spruce                     | Spruce budworm ( <i>Choristoneura fumiferana</i> )                 | I/F | 5    | [37]       |
|                              |                                 | Eastern dwarf mistletoe ( <i>Arceuthobium pusillum</i> )           | P   | 3    | [1,36]     |
|                              |                                 | Red root and butt rot ( <i>Onnia tomentosa</i> )                   | D   | 1    | [36]       |
|                              |                                 | Western spruce budworm ( <i>Choristoneura freemani</i> )           | I/F | 5    | [1,37]     |
|                              |                                 | Red root and butt rot ( <i>Onnia tomentosa</i> )                   | D   | 3    | [36]       |
|                              |                                 | Blue spruce engraver ( <i>Ips hunteri</i> )                        | I/B | 1    | [37]       |
|                              |                                 | Cytospora canker of spruce ( <i>Cytospora kunzei</i> )             | D   | 1    | [13,36]    |
| <i>Picea rubens</i>          | red spruce                      | Western spruce dwarf mistletoe ( <i>Arceuthobium microcarpum</i> ) | P   | 1    | [1]        |
|                              |                                 | Spruce budworm ( <i>Choristoneura fumiferana</i> )                 | I/F | 5    | [1]        |
|                              |                                 | Eastern dwarf mistletoe ( <i>Arceuthobium pusillum</i> )           | P   | 3    | [36]       |
| <i>Picea sitchensis</i>      | Sitka spruce                    | Spruce beetle ( <i>Dendroctonus rufipennis</i> )                   | I/B | 3    | [37]       |
|                              |                                 | Red-belted fungus ( <i>Fomitopsis pinicola</i> )                   | D   | 1    | [36]       |
|                              |                                 | Spruce beetle ( <i>Dendroctonus rufipennis</i> )                   | I/B | 5    | [1]        |
|                              |                                 | Heterobasidion root disease ( <i>Heterobasidion</i> spp.)          | D   | 3    | [36]       |
|                              |                                 | Laminated root rot ( <i>Phellinus weirii</i> )                     | D   | 3    | [36]       |
| <i>Pinus albicaulis</i>      | whitebark pine                  | White pine weevil ( <i>Pissodes strobi</i> )                       | I/B | 3    | [1]        |
|                              |                                 | Schweinitzii root and butt rot ( <i>Phaeolus schweinitzii</i> )    | D   | 1    | [36]       |
|                              |                                 | Mountain pine beetle ( <i>Dendroctonus ponderosae</i> )            | I/B | 8    | [1,37]     |
|                              |                                 | White pine blister rust ( <i>Cronartium ribicola</i> )*            | D   | 8    | [1,36]     |
|                              |                                 | Armillaria root disease ( <i>Armillaria</i> spp.)                  | D   | 3    | [13,35,36] |
|                              |                                 | Limber pine dwarf mistletoe ( <i>Arceuthobium cyanocarpum</i> )    | P   | 3    | [1,36]     |
| <i>Pinus aristata</i>        | Rocky Mountain bristlecone pine | Foliage diseases ( <i>Bifusella</i> spp.)                          | D   | 1    | [151]      |
|                              |                                 | Mountain pine beetle ( <i>Dendroctonus ponderosae</i> )            | I/B | 8    | [152]      |
|                              |                                 | White pine blister rust ( <i>Cronartium ribicola</i> )*            | D   | 5    | [7,36]     |
|                              |                                 | Limber pine dwarf mistletoe ( <i>Arceuthobium cyanocarpum</i> )    | P   | 3    | [36]       |

T/G=Taxon/Guild. Taxon: I=insect, D=disease, P=parasitic plant, C=insect and disease multi-agent complex; Guild (for insects): B=phloem- or wood-borers, F=foliage-feeders, S=sap-feeders. Sev.=Severity. Nonnative invasive agents are indicated with \*.

| Host species scientific name | Host species common name | Agent                                                             | T/G | Sev. | Sources    |
|------------------------------|--------------------------|-------------------------------------------------------------------|-----|------|------------|
| <i>Pinus arizonica</i>       | Arizona pine             | Pine engraver beetles ( <i>Ips</i> spp.)                          | I/B | 3    | [35,37]    |
|                              |                          | Twig beetle ( <i>Pityophthorus boycei</i> )                       | I/B | 1    | [37]       |
|                              |                          | Armillaria root disease ( <i>Armillaria</i> spp.)                 | D   | 3    | [13,35,36] |
|                              |                          | Dwarf mistletoe ( <i>Arceuthobium</i> spp.)                       | P   | 3    | [36]       |
|                              |                          | Limb rust ( <i>Cronartium arizonicum</i> )                        | D   | 3    | [36]       |
|                              |                          | Red root and butt rot ( <i>Onnia tomentosa</i> )                  | D   | 3    | [35,36]    |
| <i>Pinus attenuata</i>       | Knobcone pine            | Gall rust ( <i>Cronartium quercuum</i> )                          | D   | 1    | [36]       |
|                              |                          | Pine engraver beetles ( <i>Ips</i> spp.)                          | I/B | 5    | [37,153]   |
|                              |                          | Dwarf mistletoe ( <i>Arceuthobium</i> spp.)                       | P   | 3    | [36]       |
|                              |                          | Pitch canker ( <i>Fusarium circinatum</i> )*                      | D   | 3    | [36]       |
|                              |                          | Elytroderma needle cast ( <i>Elytroderma deformans</i> )          | D   | 1    | [36]       |
| <i>Pinus balfouriana</i>     | foxtail pine             | Western gall rust ( <i>Endocronartium harknessii</i> )            | D   | 1    | [36]       |
|                              |                          | Mountain pine beetle ( <i>Dendroctonus ponderosae</i> )           | I/B | 8    | [7]        |
|                              |                          | White pine blister rust ( <i>Cronartium ribicola</i> )*           | D   | 8    | [7,36]     |
| <i>Pinus banksiana</i>       | jack pine                | Limber pine dwarf mistletoe ( <i>Arceuthobium cyanocarpum</i> )   | P   | 3    | [7,36]     |
|                              |                          | Jack pine budworm ( <i>Choristoneura pinus</i> )                  | I/F | 5    | [7,37]     |
|                              |                          | Lodgepole pine dwarf mistletoe ( <i>Arceuthobium americanum</i> ) | P   | 3    | [36]       |
|                              |                          | North American pine engraver ( <i>Ips pini</i> )                  | I/B | 3    | [35,37]    |
| <i>Pinus cembroides</i>      | Mexican pinyon pine      | White pine weevil ( <i>Pissodes strobi</i> )                      | I/B | 3    | [37]       |
|                              |                          | Comandra blister rust ( <i>Cronartium comandrae</i> )             | D   | 1    | [36]       |
|                              |                          | Pinyon dwarf mistletoe ( <i>Arceuthobium divaricatum</i> )        | P   | 3    | [7,36]     |
|                              |                          | Pinyon blister rust ( <i>Cronartium occidentale</i> )             | D   | 1    | [7,36]     |
|                              |                          | Pinyon needle scale ( <i>Matsucoccus acalyptus</i> )              | I/S | 1    | [37]       |
| <i>Pinus clausa</i>          | sand pine                | Southern pine beetle ( <i>Dendroctonus frontalis</i> )            | I/B | 3    | [154]      |
|                              |                          | Armillaria root disease ( <i>Armillaria</i> spp.)                 | D   | 1    | [1,36]     |

T/G=Taxon/Guild. Taxon: I=insect, D=disease, P=parasitic plant, C=insect and disease multi-agent complex; Guild (for insects): B=phloem- or wood-borers, F=foliage-feeders, S=sap-feeders. Sev.=Severity. Nonnative invasive agents are indicated with \*.

| Host species scientific name | Host species common name | Agent                                                             | T/G | Sev. | Sources    |
|------------------------------|--------------------------|-------------------------------------------------------------------|-----|------|------------|
| <i>Pinus contorta</i>        | lodgepole pine           | Pine engraver beetles ( <i>Ips</i> spp.)                          | I/B | 1    | [1,37,155] |
|                              |                          | Red root and butt rot ( <i>Onnia tomentosa</i> )                  | D   | 1    | [36]       |
|                              |                          | Virginia pine sawfly ( <i>Neodiprion pratti</i> )                 | I/F | 1    | [1]        |
|                              |                          | Mountain pine beetle ( <i>Dendroctonus ponderosae</i> )           | I/B | 8    | [1,37]     |
|                              |                          | Armillaria root disease ( <i>Armillaria</i> spp.)                 | D   | 3    | [1]        |
|                              |                          | Comandra blister rust ( <i>Cronartium comandrae</i> )             | D   | 3    | [1,36]     |
|                              |                          | Lodgepole pine dwarf mistletoe ( <i>Arceuthobium americanum</i> ) | P   | 3    | [1,36]     |
| <i>Pinus coulteri</i>        | Coulter pine             | Pine engraver beetles ( <i>Ips</i> spp.)                          | I/B | 3    | [1,156]    |
|                              |                          | Western pine beetle ( <i>Dendroctonus brevicomis</i> )            | I/B | 8    | [37]       |
|                              |                          | Pine engraver beetles ( <i>Ips</i> spp.)                          | I/B | 5    | [37,153]   |
|                              |                          | Dwarf mistletoe ( <i>Arceuthobium</i> spp.)                       | P   | 3    | [36]       |
|                              |                          | Elytroderma needle cast ( <i>Elytroderma deformans</i> )          | D   | 1    | [36]       |
| <i>Pinus discolor</i>        | border pinyon            | Pitch canker ( <i>Fusarium circinatum</i> )*                      | D   | 1    | [34]       |
|                              |                          | Pinyon dwarf mistletoe ( <i>Arceuthobium divaricatum</i> )        | P   | 3    | [36]       |
|                              |                          | Pinyon blister rust ( <i>Cronartium occidentale</i> )             | D   | 1    | [36]       |
|                              |                          | Pinyon needle scale ( <i>Matsucoccus acalyptus</i> )              | I/S | 1    | [37]       |
| <i>Pinus echinata</i>        | shortleaf pine           | Phytophthora root rot ( <i>Phytophthora cinnamomi</i> )*          | D   | 5    | [1,36]     |
|                              |                          | Southern pine beetle ( <i>Dendroctonus frontalis</i> )            | I/B | 5    | [154]      |
|                              |                          | Pine engraver beetles ( <i>Ips</i> spp.)                          | I/B | 1    | [1,37,155] |
|                              |                          | Pitch canker ( <i>Fusarium circinatum</i> )*                      | D   | 1    | [36]       |
|                              |                          | Redheaded pine sawfly ( <i>Neodiprion lecontei</i> )              | I/F | 1    | [1]        |
| <i>Pinus edulis</i>          | common pinyon            | Pinyon ips ( <i>Ips confusus</i> )                                | I/B | 8    | [12,153]   |
|                              |                          | Pinyon blister rust ( <i>Cronartium occidentale</i> )             | D   | 3    | [1,36]     |
|                              |                          | Pinyon dwarf mistletoe ( <i>Arceuthobium divaricatum</i> )        | P   | 3    | [36]       |
|                              |                          | Pinyon needle scale ( <i>Matsucoccus acalyptus</i> )              | I/S | 1    | [1,37]     |
|                              |                          | Pinyon sawfly ( <i>Neodiprion edulicolus</i> )                    | I/F | 1    | [1,37]     |

T/G=Taxon/Guild. Taxon: I=insect, D=disease, P=parasitic plant, C=insect and disease multi-agent complex; Guild (for insects): B=phloem- or wood-borers, F=foliage-feeders, S=sap-feeders. Sev.=Severity. Nonnative invasive agents are indicated with \*.

| Host species scientific name | Host species common name | Agent                                                                | T/G | Sev. | Sources    |
|------------------------------|--------------------------|----------------------------------------------------------------------|-----|------|------------|
| <i>Pinus elliotii</i>        | slash pine               | Fusiform rust ( <i>Cronartium quercuum</i> f. sp. <i>fusiforme</i> ) | D   | 3    | [1,36]     |
|                              |                          | Heterobasidion root disease ( <i>Heterobasidion</i> spp.)            | D   | 1    | [1,36]     |
|                              |                          | Pine engraver beetles ( <i>Ips</i> spp.)                             | I/B | 1    | [1,37,155] |
|                              |                          | Pitch canker ( <i>Fusarium circinatum</i> )*                         | D   | 1    | [36]       |
|                              |                          | Southern pine beetle ( <i>Dendroctonus frontalis</i> )               | I/B | 1    | [154]      |
| <i>Pinus engelmannii</i>     | Apache pine              | Dwarf mistletoe ( <i>Arceuthobium</i> spp.)                          | P   | 3    | [36]       |
|                              |                          | Limb rust ( <i>Cronartium</i> sp.)                                   | D   | 3    | [36]       |
|                              |                          | Southern pine beetle ( <i>Dendroctonus frontalis</i> )               | I/B | 3    | [37]       |
| <i>Pinus flexilis</i>        | limber pine              | Mountain pine beetle ( <i>Dendroctonus ponderosae</i> )              | I/B | 8    | [1,37]     |
|                              |                          | White pine blister rust ( <i>Cronartium ribicola</i> )*              | D   | 8    | [1,36]     |
|                              |                          | Limber pine dwarf mistletoe ( <i>Arceuthobium cyanocarpum</i> )      | P   | 3    | [1,36]     |
|                              |                          | Pine engraver beetles ( <i>Ips</i> spp.)                             | I/B | 3    | [35,37]    |
|                              |                          | Twig beetles ( <i>Pityophthorus</i> spp.)                            | I/B | 1    | [37]       |
| <i>Pinus glabra</i>          | spruce pine              | Southern pine beetle ( <i>Dendroctonus frontalis</i> )               | I/B | 3    | [154]      |
|                              |                          | Ganoderma root and butt rot ( <i>Ganoderma meredithae</i> )          | D   | 1    | [36]       |
|                              |                          | Pine engraver beetles ( <i>Ips</i> spp.)                             | I/B | 1    | [37,155]   |
| <i>Pinus jeffreyi</i>        | Jeffrey pine             | Jeffrey pine beetle ( <i>Dendroctonus jeffreyi</i> )                 | I/B | 5    | [1,37]     |
|                              |                          | Pine engraver beetles ( <i>Ips</i> spp.)                             | I/B | 5    | [1,37]     |
|                              |                          | Black-stain root disease ( <i>Leptographium wageneri</i> )           | D   | 3    | [36]       |
|                              |                          | Elytroderma needle cast ( <i>Elytroderma deformans</i> )             | D   | 3    | [1]        |
|                              |                          | Western dwarf mistletoe ( <i>Arceuthobium campylopodum</i> )         | P   | 3    | [1,36]     |
| <i>Pinus lambertiana</i>     | sugar pine               | Mountain pine beetle ( <i>Dendroctonus ponderosae</i> )              | I/B | 8    | [1,37]     |
|                              |                          | White pine blister rust ( <i>Cronartium ribicola</i> )*              | D   | 8    | [1,36]     |
|                              |                          | Dwarf mistletoe ( <i>Arceuthobium californicum</i> )                 | P   | 3    | [1]        |
|                              |                          | Heterobasidion root disease ( <i>Heterobasidion</i> spp.)            | D   | 3    | [1]        |

T/G=Taxon/Guild. Taxon: I=insect, D=disease, P=parasitic plant, C=insect and disease multi-agent complex; Guild (for insects): B=phloem- or wood-borers, F=foliage-feeders, S=sap-feeders. Sev.=Severity. Nonnative invasive agents are indicated with \*.

| Host species scientific name               | Host species common name     | Agent                                                         | T/G | Sev. | Sources    |
|--------------------------------------------|------------------------------|---------------------------------------------------------------|-----|------|------------|
| <i>Pinus leiophylla</i>                    | Chihuahuan pine              | White pine needle cast ( <i>Lophodermella arcuata</i> )       | D   | 1    | [1,36]     |
|                                            |                              | Armillaria root disease ( <i>Armillaria</i> spp.)             | D   | 3    | [13,35,36] |
|                                            |                              | Dwarf mistletoe ( <i>Arceuthobium gillii</i> )                | P   | 3    | [36]       |
|                                            |                              | Red root and butt rot ( <i>Onnia tomentosa</i> )              | D   | 3    | [35,36]    |
| <i>Pinus longaeva</i>                      | Great Basin bristlecone pine | Southern pine beetle ( <i>Dendroctonus frontalis</i> )        | I/B | 3    | [37]       |
|                                            |                              | White pine blister rust ( <i>Cronartium ribicola</i> )*       | D   | 8    | [34]       |
|                                            |                              | Western dwarf mistletoe ( <i>Arceuthobium campylopodum</i> )  | P   | 3    | [7]        |
|                                            |                              | Brown spot needle blight ( <i>Mycosphaerella dearnessii</i> ) | D   | 1    | [36]       |
| <i>Pinus monophylla</i>                    | singleleaf pinyon            | Mountain pine beetle ( <i>Dendroctonus ponderosae</i> )       | I/B | 1    | [7]        |
|                                            |                              | Pinyon ips ( <i>Ips confusus</i> )                            | I/B | 8    | [1,37,153] |
|                                            |                              | Pinyon dwarf mistletoe ( <i>Arceuthobium divaricatum</i> )    | P   | 3    | [1]        |
|                                            |                              | Pinyon blister rust ( <i>Cronartium occidentale</i> )         | D   | 1    | [1]        |
|                                            |                              | Pinyon needle scale ( <i>Matsucoccus acalyptus</i> )          | I/S | 1    | [1]        |
|                                            |                              | Pinyon sawfly ( <i>Neodiprion edulicolus</i> )                | I/F | 1    | [1]        |
| <i>Pinus monophylla</i> var. <i>fallax</i> | Arizona pinyon pine          | Pinyon ips ( <i>Ips confusus</i> )                            | I/B | 8    | [1,37,153] |
|                                            |                              | Pinyon dwarf mistletoe ( <i>Arceuthobium divaricatum</i> )    | P   | 3    | [1]        |
|                                            |                              | Pinyon blister rust ( <i>Cronartium occidentale</i> )         | D   | 1    | [1]        |
|                                            |                              | Pinyon needle scale ( <i>Matsucoccus acalyptus</i> )          | I/S | 1    | [1]        |
|                                            |                              | Pinyon sawfly ( <i>Neodiprion edulicolus</i> )                | I/F | 1    | [1]        |
|                                            |                              | Mountain pine beetle ( <i>Dendroctonus ponderosae</i> )       | I/B | 8    | [1,37]     |
| <i>Pinus monticola</i>                     | western white pine           | White pine blister rust ( <i>Cronartium ribicola</i> )*       | D   | 8    | [1,36]     |
|                                            |                              | Armillaria root disease ( <i>Armillaria</i> spp.)             | D   | 3    | [1,36]     |
|                                            |                              | Dwarf mistletoe ( <i>Arceuthobium monticola</i> )             | P   | 3    | [36]       |
|                                            |                              | Red ring rot ( <i>Phellinus pini</i> )                        | D   | 1    | [1,36]     |
|                                            |                              | Pitch canker ( <i>Fusarium circinatum</i> )*                  | D   | 5    | [34,36]    |
| <i>Pinus muricata</i>                      | bishop pine                  |                                                               |     |      |            |

T/G=Taxon/Guild. Taxon: I=insect, D=disease, P=parasitic plant, C=insect and disease multi-agent complex; Guild (for insects): B=phloem- or wood-borers, F=foliage-feeders, S=sap-feeders. Sev.=Severity. Nonnative invasive agents are indicated with \*.



| Host species scientific name                  | Host species common name | Agent                                                                | T/G | Sev. | Sources    |
|-----------------------------------------------|--------------------------|----------------------------------------------------------------------|-----|------|------------|
| <i>Pinus palustris</i>                        | longleaf pine            | Coastal dwarf mistletoe ( <i>Arceuthobium littorum</i> )             | P   | 3    | [36]       |
|                                               |                          | Monterey pine weevil ( <i>Pissodes radiatae</i> )*                   | I/B | 1    | [37]       |
|                                               |                          | Fusiform rust ( <i>Cronartium quercuum</i> f. sp. <i>fusiforme</i> ) | D   | 3    | [1,36]     |
|                                               |                          | Heterobasidion root disease ( <i>Heterobasidion</i> spp.)            | D   | 1    | [1]        |
|                                               |                          | Pine engraver beetles ( <i>Ips</i> spp.)                             | I/B | 1    | [1,37,155] |
|                                               |                          | Pitch canker ( <i>Fusarium circinatum</i> )*                         | D   | 1    | [36]       |
| <i>Pinus ponderosa</i>                        | ponderosa pine           | Southern pine beetle ( <i>Dendroctonus frontalis</i> )               | I/B | 1    | [1]        |
|                                               |                          | Mountain pine beetle ( <i>Dendroctonus ponderosae</i> )              | I/B | 8    | [37]       |
|                                               |                          | Pine engraver beetles ( <i>Ips</i> spp.)                             | I/B | 8    | [1,37]     |
|                                               |                          | Armillaria root disease ( <i>Armillaria</i> spp.)                    | D   | 5    | [1,36]     |
|                                               |                          | Dwarf mistletoe ( <i>Arceuthobium</i> spp.)                          | P   | 3    | [1,36]     |
|                                               |                          | Comandra blister rust ( <i>Cronartium comandrae</i> )                | D   | 1    | [36]       |
| <i>Pinus ponderosa</i> var. <i>washoensis</i> | Washoe pine              | Mountain pine beetle ( <i>Dendroctonus ponderosae</i> )              | I/B | 5    | [37]       |
|                                               |                          | Western dwarf mistletoe ( <i>Arceuthobium campylopodum</i> )         | P   | 3    | [1,36]     |
|                                               |                          | Armillaria root disease ( <i>Armillaria</i> spp.)                    | D   | 1    | [1,36]     |
|                                               |                          | Comandra blister rust ( <i>Cronartium comandrae</i> )                | D   | 1    | [35,36]    |
|                                               |                          | Elytroderma needle cast ( <i>Elytroderma deformans</i> )             | D   | 1    | [1,36]     |
|                                               |                          | Southern pine beetle ( <i>Dendroctonus frontalis</i> )               | I/B | 3    | [1]        |
| <i>Pinus pungens</i>                          | Table Mountain pine      | Comandra blister rust ( <i>Cronartium comandrae</i> )                | D   | 1    | [1]        |
|                                               |                          | European pine sawfly ( <i>Neodiprion sertifer</i> )*                 | I/F | 1    | [1]        |
|                                               |                          | Pine engraver beetles ( <i>Ips</i> spp.)                             | I/B | 1    | [37,152]   |
|                                               |                          | Schweinitzii root and butt rot ( <i>Phaeolus schweinitzii</i> )      | D   | 1    | [1]        |
|                                               |                          | Pinyon dwarf mistletoe ( <i>Arceuthobium divaricatum</i> )           | P   | 3    | [7,36]     |
|                                               |                          | Pinyon ips ( <i>Ips confusus</i> )                                   | I/B | 3    | [37,153]   |
| <i>Pinus quadrifolia</i>                      | four-leaf pine           | Pinon twig beetle ( <i>Pityophthorus punctifrons</i> )               | I/B | 1    | [37]       |

T/G=Taxon/Guild. Taxon: I=insect, D=disease, P=parasitic plant, C=insect and disease multi-agent complex; Guild (for insects): B=phloem- or wood-borers, F=foliage-feeders, S=sap-feeders. Sev.=Severity. Nonnative invasive agents are indicated with \*.

| Host species scientific name | Host species common name | Agent                                                                | T/G | Sev. | Sources    |
|------------------------------|--------------------------|----------------------------------------------------------------------|-----|------|------------|
| <i>Pinus radiata</i>         | Monterey pine            | Pine engraver beetles ( <i>Ips</i> spp.)                             | I/B | 5    | [1,37]     |
|                              |                          | Pitch canker ( <i>Fusarium circinatum</i> )*                         | D   | 5    | [34,36]    |
|                              |                          | Western gall rust ( <i>Endocronartium harknessii</i> )               | D   | 3    | [1,36]     |
|                              |                          | Monterey pine weevil ( <i>Pissodes radiatae</i> )*                   | I/B | 1    | [1]        |
| <i>Pinus remota</i>          | papershell pinyon pine   | Pinyon dwarf mistletoe ( <i>Arceuthobium divaricatum</i> )           | P   | 3    | [1,36]     |
|                              |                          | Pinyon blister rust ( <i>Cronartium occidentale</i> )                | D   | 1    | [1,36]     |
|                              |                          | Pinyon needle scale ( <i>Matsucoccus acalyptus</i> )                 | I/S | 1    | [37]       |
| <i>Pinus resinosa</i>        | red pine                 | Red pine scale ( <i>Matsucoccus resinosa</i> )*                      | I/S | 3    | [1,37]     |
|                              |                          | Heterobasidion root disease ( <i>Heterobasidion</i> spp.)            | D   | 1    | [1,36]     |
|                              |                          | Sawfly ( <i>Neodiprion</i> spp.)                                     | I/F | 1    | [1,37]     |
|                              |                          | Scleroderris canker ( <i>Gremmeniella abietina</i> )*                | D   | 1    | [1,36]     |
|                              |                          | White pine weevil ( <i>Pissodes strobi</i> )                         | I/B | 1    | [37]       |
| <i>Pinus rigida</i>          | pitch pine               | Gall rust ( <i>Cronartium quercuum</i> )                             | D   | 3    | [36]       |
|                              |                          | Southern pine beetle ( <i>Dendroctonus frontalis</i> )               | I/B | 3    | [1,37]     |
|                              |                          | Fusiform rust ( <i>Cronartium quercuum</i> f. sp. <i>fusiforme</i> ) | D   | 1    | [1,36]     |
|                              |                          | Heterobasidion root disease ( <i>Heterobasidion</i> spp.)            | D   | 1    | [1]        |
|                              |                          | Sawfly ( <i>Neodiprion</i> spp.)                                     | I/F | 1    | [37]       |
| <i>Pinus sabiniana</i>       | gray pine                | Bark beetle ( <i>Orthotomicus spinifer</i> )                         | I/B | 3    | [1]        |
|                              |                          | Dwarf mistletoe ( <i>Arceuthobium occidentale</i> )                  | P   | 3    | [1,36]     |
|                              |                          | Pitch canker ( <i>Fusarium circinatum</i> )*                         | D   | 1    | [36,157]   |
|                              |                          | Western gall rust ( <i>Endocronartium harknessii</i> )               | D   | 1    | [1]        |
| <i>Pinus serotina</i>        | pond pine                | Gall rust ( <i>Cronartium quercuum</i> )                             | D   | 3    | [36]       |
|                              |                          | Southern pine beetle ( <i>Dendroctonus frontalis</i> )               | I/B | 3    | [154]      |
|                              |                          | Fusiform rust ( <i>Cronartium quercuum</i> f. sp. <i>fusiforme</i> ) | D   | 1    | [1,36]     |
|                              |                          | Pine engraver beetles ( <i>Ips</i> spp.)                             | I/B | 1    | [1,37,152] |

T/G=Taxon/Guild. Taxon: I=insect, D=disease, P=parasitic plant, C=insect and disease multi-agent complex; Guild (for insects): B=phloem- or wood-borers, F=foliage-feeders, S=sap-feeders. Sev.=Severity. Nonnative invasive agents are indicated with \*.

| Host species scientific name | Host species common name | Agent                                                                                        | T/G | Sev. | Sources    |
|------------------------------|--------------------------|----------------------------------------------------------------------------------------------|-----|------|------------|
| <i>Pinus strobiformis</i>    | southwestern white pine  | Red ring rot ( <i>Phellinus pini</i> )                                                       | D   | 1    | [1]        |
|                              |                          | White pine blister rust ( <i>Cronartium ribicola</i> )*                                      | D   | 8    | [36]       |
|                              |                          | Pine engraver beetles ( <i>Ips</i> spp.)                                                     | I/B | 5    | [35,37]    |
|                              |                          | Roundheaded pine beetle ( <i>Dendroctonus adjunctus</i> )                                    | I/B | 5    | [37]       |
| <i>Pinus strobus</i>         | white pine               | Apache dwarf mistletoe ( <i>Arceuthobium apachecum</i> )                                     | P   | 3    | [36]       |
|                              |                          | Armillaria root disease ( <i>Armillaria</i> spp.)                                            | D   | 3    | [13,35,36] |
|                              |                          | White pine blister rust ( <i>Cronartium ribicola</i> )*                                      | D   | 5    | [1,36]     |
|                              |                          | Canadian pine scale ( <i>Matsucoccus macrocicatrices</i> )/ <i>Caliciopsis pinea</i> complex | C   | 3    | [158]      |
|                              |                          | Heterobasidion root disease ( <i>Heterobasidion</i> spp.)                                    | D   | 1    | [1,36]     |
| <i>Pinus taeda</i>           | loblolly pine            | Pine shoot beetle ( <i>Tomicus piniperda</i> )*                                              | I/B | 1    | [37]       |
|                              |                          | White pine weevil ( <i>Pissodes strobi</i> )                                                 | I/B | 1    | [1,37]     |
|                              |                          | Southern pine beetle ( <i>Dendroctonus frontalis</i> )                                       | I/B | 5    | [1,37]     |
|                              |                          | Fusiform rust ( <i>Cronartium quercuum</i> f. sp. <i>fusiforme</i> )                         | D   | 3    | [36]       |
|                              |                          | Pine engraver beetles ( <i>Ips</i> spp.)                                                     | I/B | 3    | [1,37,155] |
| <i>Pinus torreyana</i>       | Torrey pine              | Heterobasidion root disease ( <i>Heterobasidion</i> spp.)                                    | D   | 1    | [1,36]     |
|                              |                          | Sawfly ( <i>Neodiprion</i> spp.)                                                             | I/F | 1    | [35,37]    |
|                              |                          | California fivespined ips ( <i>Ips paraconfusus</i> )                                        | I/B | 5    | [7]        |
|                              |                          | Dwarf mistletoe ( <i>Arceuthobium occidentale</i> )                                          | P   | 3    | [1,36]     |
|                              |                          | Pitch canker ( <i>Fusarium circinatum</i> )*                                                 | D   | 3    | [36,157]   |
| <i>Pinus virginiana</i>      | Virginia pine            | Bark beetle ( <i>Ips spinifer</i> )                                                          | I/B | 1    | [1]        |
|                              |                          | Western gall rust ( <i>Endocronartium harknessii</i> )                                       | D   | 1    | [1]        |
|                              |                          | Pitch canker ( <i>Fusarium circinatum</i> )*                                                 | D   | 3    | [1,36]     |
|                              |                          | Southern pine beetle ( <i>Dendroctonus frontalis</i> )                                       | I/B | 3    | [1]        |
|                              |                          | Gall rust of Virginia pine ( <i>Cronartium quercuum</i> f. sp. <i>virginianae</i> )          | D   | 1    | [1,36]     |
|                              |                          | Red ring rot ( <i>Phellinus pini</i> )                                                       | D   | 1    | [1]        |

T/G=Taxon/Guild. Taxon: I=insect, D=disease, P=parasitic plant, C=insect and disease multi-agent complex; Guild (for insects): B=phloem- or wood-borers, F=foliage-feeders, S=sap-feeders. Sev.=Severity. Nonnative invasive agents are indicated with \*.

| Host species scientific name                       | Host species common name | Agent                                                               | T/G | Sev. | Sources   |
|----------------------------------------------------|--------------------------|---------------------------------------------------------------------|-----|------|-----------|
|                                                    |                          | Sawfly ( <i>Neodiprion</i> spp.)                                    | I/F | 1    | [1,35]    |
| <i>Piscidia piscipula</i>                          | fishpoison tree          | Psyllid ( <i>Euphalerus nidifex</i> )                               | I/F | 1    | [159]     |
| <i>Pistacia mexicana</i>                           | Texas pistache           | none                                                                | .   | .    | .         |
| <i>Planera aquatica</i>                            | water-elm                | Dutch elm disease ( <i>Ophiostoma novo-ulmi</i> )*                  | D   | 5    | [160,161] |
| <i>Platanus occidentalis</i>                       | American sycamore        | Sycamore canker ( <i>Ceratocystis fimbriata</i> f. <i>platani</i> ) | D   | 5    | [1,36]    |
|                                                    |                          | Anthracnose ( <i>Apiognomonium veneta</i> )                         | D   | 1    | [1,36]    |
|                                                    |                          | Bacterial leaf scorch ( <i>Xylella fastidiosa</i> )                 | D   | 1    | [36]      |
|                                                    |                          | Sycamore lace bug ( <i>Corythucha ciliata</i> )                     | I/F | 1    | [1]       |
| <i>Platanus racemosa</i>                           | California sycamore      | Polyphagous shot hole borer ( <i>Euwallacea</i> spp.)*              | I/B | 8    | [38,162]  |
|                                                    |                          | Anthracnose ( <i>Apiognomonium veneta</i> )                         | D   | 1    | [36]      |
|                                                    |                          | Sycamore borer ( <i>Synanthedon resplendens</i> )                   | I/B | 1    | [163]     |
| <i>Platanus wrightii</i>                           | Arizona sycamore         | Anthracnose ( <i>Apiognomonium veneta</i> )                         | D   | 1    | [36]      |
|                                                    |                          | Eastern mistletoe ( <i>Phoradendron leucarpum</i> )                 | P   | 1    | [164]     |
|                                                    |                          | Oak bracket ( <i>Inonotus dryadeus</i> )                            | D   | 1    | [36]      |
| <i>Populus angustifolia</i>                        | narrowleaf cottonwood    | Poplar borer ( <i>Saperda calcarata</i> )                           | I/B | 3    | [37]      |
|                                                    |                          | Cottonwood leaf beetle ( <i>Chrysomela scripta</i> )                | I/F | 1    | [165]     |
|                                                    |                          | Poplar rust ( <i>Melampsora abietis-canadensis</i> )                | D   | 1    | [8]       |
|                                                    |                          | Poplar-and-willow borer ( <i>Cryptorhynchus lapathi</i> )*          | I/B | 1    | [34]      |
| <i>Populus balsamifera</i>                         | balsam poplar            | Gypsy moth ( <i>Lymantria dispar dispar</i> )*                      | I/F | 3    | [34]      |
|                                                    |                          | Forest tent caterpillar ( <i>Malacosoma disstria</i> )              | I/F | 1    | [12]      |
|                                                    |                          | Oystershell scale ( <i>Lepidosaphes ulmi</i> )*                     | I/S | 1    | [34]      |
|                                                    |                          | Poplar borer ( <i>Saperda calcarata</i> )                           | I/B | 1    | [1,37]    |
|                                                    |                          | Poplar rust ( <i>Melampsora abietis-canadensis</i> )                | D   | 1    | [1,36]    |
| <i>Populus balsamifera</i> ssp. <i>trichocarpa</i> | black cottonwood         | Cottonwood leaf beetle ( <i>Chrysomela scripta</i> )                | I/F | 1    | [165]     |
|                                                    |                          | Cytospora canker ( <i>Cytospora chrysosperma</i> )                  | D   | 1    | [13]      |
|                                                    |                          | Oystershell scale ( <i>Lepidosaphes ulmi</i> )*                     | I/S | 1    | [1]       |

T/G=Taxon/Guild. Taxon: I=insect, D=disease, P=parasitic plant, C=insect and disease multi-agent complex; Guild (for insects): B=phloem- or wood-borers, F=foliage-feeders, S=sap-feeders. Sev.=Severity. Nonnative invasive agents are indicated with \*.

| Host species scientific name                    | Host species common name | Agent                                                      | T/G | Sev. | Sources |
|-------------------------------------------------|--------------------------|------------------------------------------------------------|-----|------|---------|
| <i>Populus deltoides</i>                        | eastern cottonwood       | Poplar rust ( <i>Melampsora occidentalis</i> )             | D   | 1    | [36]    |
|                                                 |                          | Poplar-and-willow borer ( <i>Cryptorhynchus lapathi</i> )* | I/B | 1    | [1]     |
|                                                 |                          | Artist's conk ( <i>Ganoderma applanatum</i> )              | D   | 1    | [36]    |
|                                                 |                          | Cottonwood borer ( <i>Plectrodera scalator</i> )           | I/B | 1    | [1]     |
|                                                 |                          | Forest tent caterpillar ( <i>Malacosoma disstria</i> )     | I/F | 1    | [12]    |
|                                                 |                          | Poplar borer ( <i>Saperda calcarata</i> )                  | I/B | 1    | [1,37]  |
| <i>Populus deltoides</i> ssp. <i>monilifera</i> | plains cottonwood        | Poplar rust ( <i>Melampsora abietis-canadensis</i> )       | D   | 1    | [1,36]  |
|                                                 |                          | Artist's conk ( <i>Ganoderma applanatum</i> )              | D   | 1    | [36]    |
|                                                 |                          | Cottonwood borer ( <i>Plectrodera scalator</i> )           | I/B | 1    | [1]     |
|                                                 |                          | Forest tent caterpillar ( <i>Malacosoma disstria</i> )     | I/F | 1    | [12]    |
|                                                 |                          | Poplar borer ( <i>Saperda calcarata</i> )                  | I/B | 1    | [1,37]  |
|                                                 |                          | Poplar rust ( <i>Melampsora abietis-canadensis</i> )       | D   | 1    | [36]    |
| <i>Populus fremontii</i>                        | Fremont cottonwood       | Canker ( <i>Cryptosphaeria pullmanensis</i> )              | D   | 1    | [166]   |
|                                                 |                          | Cottonwood leaf beetle ( <i>Chrysomela scripta</i> )       | I/F | 1    | [165]   |
|                                                 |                          | Sooty canker ( <i>Fusicoccum mangiferum</i> )              | D   | 1    | [36]    |
|                                                 |                          | Gypsy moth ( <i>Lymantria dispar dispar</i> )*             | I/F | 3    | [34]    |
| <i>Populus grandidentata</i>                    | bigtooth aspen           | Hypoxyton canker of aspen ( <i>Entoleuca mammata</i> )     | D   | 3    | [13,36] |
|                                                 |                          | Artist's conk ( <i>Ganoderma applanatum</i> )              | D   | 1    | [1]     |
|                                                 |                          | Forest tent caterpillar ( <i>Malacosoma disstria</i> )     | I/F | 1    | [167]   |
|                                                 |                          | Poplar borer ( <i>Saperda calcarata</i> )                  | I/B | 1    | [1,37]  |
|                                                 |                          | Gypsy moth ( <i>Lymantria dispar dispar</i> )*             | I/F | 3    | [34]    |
| <i>Populus heterophylla</i>                     | swamp cottonwood         | Cottonwood leaf beetle ( <i>Chrysomela scripta</i> )       | I/F | 1    | [165]   |
|                                                 |                          | Forest tent caterpillar ( <i>Malacosoma disstria</i> )     | I/F | 1    | [35,37] |
|                                                 |                          | Melampsora leaf rust ( <i>Melampsora medusae</i> )         | D   | 1    | [1]     |
|                                                 |                          | Poplar borer ( <i>Saperda calcarata</i> )                  | I/B | 1    | [1,37]  |

T/G=Taxon/Guild. Taxon: I=insect, D=disease, P=parasitic plant, C=insect and disease multi-agent complex; Guild (for insects): B=phloem- or wood-borers, F=foliage-feeders, S=sap-feeders. Sev.=Severity. Nonnative invasive agents are indicated with \*.

| Host species scientific name | Host species common name | Agent                                                             | T/G | Sev. | Sources     |
|------------------------------|--------------------------|-------------------------------------------------------------------|-----|------|-------------|
| <i>Populus tremuloides</i>   | quaking aspen            | Bronze poplar borer ( <i>Agrilus liragus</i> )                    | I/B | 3    | [1,168-170] |
|                              |                          | Cytospora canker ( <i>Cytospora chrysosperma</i> )                | D   | 3    | [36]        |
|                              |                          | Forest tent caterpillar ( <i>Malacosoma disstria</i> )            | I/F | 3    | [1,12]      |
|                              |                          | Poplar borer ( <i>Saperda calcarata</i> )                         | I/B | 3    | [37]        |
|                              |                          | Sooty bark canker ( <i>Encoelia pruinosa</i> )                    | D   | 3    | [1,171]     |
| <i>Prosopis glandulosa</i>   | honey mesquite           | Borer ( <i>Megacyllene antennata</i> )                            | I/B | 1    | [37]        |
|                              |                          | Mistletoe ( <i>Phoradendron californicum</i> )                    | P   | 1    | [36]        |
|                              |                          | White mottled rot ( <i>Ganoderma</i> spp.)                        | D   | 1    | [36]        |
| <i>Prosopis pubescens</i>    | screwbean mesquite       | Borer ( <i>Megacyllene antennata</i> )                            | I/B | 1    | [37]        |
|                              |                          | Mistletoe ( <i>Phoradendron californicum</i> )                    | P   | 1    | [36]        |
|                              |                          | White mottled rot ( <i>Ganoderma</i> spp.)                        | D   | 1    | [36]        |
| <i>Prosopis velutina</i>     | velvet mesquite          | Borer ( <i>Megacyllene antennata</i> )                            | I/B | 1    | [37]        |
|                              |                          | Mistletoe ( <i>Phoradendron californicum</i> )                    | P   | 1    | [36]        |
|                              |                          | White mottled rot ( <i>Ganoderma</i> spp.)                        | D   | 1    | [36]        |
| <i>Prunus alleghaniensis</i> | Allegheny plum           | Bacterial spot ( <i>Xanthomonas campestris</i> pv. <i>pruni</i> ) | D   | 1    | [36]        |
|                              |                          | Black knot ( <i>Apiosporina morbosa</i> )                         | D   | 1    | [36]        |
|                              |                          | Cherry leaf spot ( <i>Blumeriella jaapii</i> )                    | D   | 1    | [36]        |
|                              |                          | Eastern tent caterpillar ( <i>Malacosoma americanum</i> )         | I/F | 1    | [35,37]     |
| <i>Prunus americana</i>      | American plum            | Prunus X-disease ( <i>Phytoplasma</i> )                           | D   | 5    | [36]        |
|                              |                          | Bacterial spot ( <i>Xanthomonas campestris</i> pv. <i>pruni</i> ) | D   | 1    | [36]        |
|                              |                          | Black knot ( <i>Apiosporina morbosa</i> )                         | D   | 1    | [36]        |
|                              |                          | Cherry leaf spot ( <i>Blumeriella jaapii</i> )                    | D   | 1    | [36]        |
|                              |                          | Tent caterpillar ( <i>Malacosoma</i> spp.)                        | I/F | 1    | [35,37]     |
| <i>Prunus angustifolia</i>   | Chickasaw plum           | Bacterial spot ( <i>Xanthomonas campestris</i> pv. <i>pruni</i> ) | D   | 1    | [36]        |
|                              |                          | Black knot ( <i>Apiosporina morbosa</i> )                         | D   | 1    | [36]        |

T/G=Taxon/Guild. Taxon: I=insect, D=disease, P=parasitic plant, C=insect and disease multi-agent complex; Guild (for insects): B=phloem- or wood-borers, F=foliage-feeders, S=sap-feeders. Sev.=Severity. Nonnative invasive agents are indicated with \*.

| Host species scientific name | Host species common name | Agent                                                             | T/G | Sev. | Sources   |
|------------------------------|--------------------------|-------------------------------------------------------------------|-----|------|-----------|
| <i>Prunus caroliniana</i>    | Carolina laurelcherry    | Cherry leaf spot ( <i>Blumeriella jaapii</i> )                    | D   | 1    | [36]      |
|                              |                          | Tent caterpillar ( <i>Malacosoma</i> spp.)                        | I/F | 1    | [35,37]   |
|                              |                          | Bacterial spot ( <i>Xanthomonas campestris</i> pv. <i>pruni</i> ) | D   | 1    | [36]      |
|                              |                          | Black knot ( <i>Apiosporina morbosa</i> )                         | D   | 1    | [36]      |
| <i>Prunus emarginata</i>     | bitter cherry            | Cherry leaf spot ( <i>Blumeriella jaapii</i> )                    | D   | 1    | [36]      |
|                              |                          | Eastern tent caterpillar ( <i>Malacosoma americanum</i> )         | I/F | 1    | [35,37]   |
|                              |                          | Black knot ( <i>Apiosporina morbosa</i> )                         | D   | 3    | [36]      |
|                              |                          | Cherry leaf spot ( <i>Blumeriella jaapii</i> )                    | D   | 1    | [36]      |
| <i>Prunus hortulana</i>      | hotulan plum             | Leaf curl and witches broom ( <i>Taphrina wiesneri</i> )          | D   | 1    | [36]      |
|                              |                          | Tent caterpillar ( <i>Malacosoma</i> spp.)                        | I/F | 1    | [35,37]   |
|                              |                          | Bacterial spot ( <i>Xanthomonas campestris</i> pv. <i>pruni</i> ) | D   | 1    | [36]      |
|                              |                          | Black knot ( <i>Apiosporina morbosa</i> )                         | D   | 1    | [36]      |
| <i>Prunus mexicana</i>       | Mexicana plum            | Cherry leaf spot ( <i>Blumeriella jaapii</i> )                    | D   | 1    | [36]      |
|                              |                          | Eastern tent caterpillar ( <i>Malacosoma americanum</i> )         | I/F | 1    | [35,37]   |
|                              |                          | Black knot ( <i>Apiosporina morbosa</i> )                         | D   | 1    | [36]      |
|                              |                          | Cherry leaf spot ( <i>Blumeriella jaapii</i> )                    | D   | 1    | [36]      |
| <i>Prunus nigra</i>          | Canada plum              | Eastern tent caterpillar ( <i>Malacosoma americanum</i> )         | I/F | 1    | [35,37]   |
|                              |                          | Black knot ( <i>Apiosporina morbosa</i> )                         | D   | 1    | [36]      |
|                              |                          | Cherry leaf spot ( <i>Blumeriella jaapii</i> )                    | D   | 1    | [36]      |
| <i>Prunus pensylvanica</i>   | pin cherry               | Eastern tent caterpillar ( <i>Malacosoma americanum</i> )         | I/F | 1    | [35,37]   |
|                              |                          | Black knot ( <i>Apiosporina morbosa</i> )                         | D   | 1    | [1,36]    |
|                              |                          | Cherry leaf spot ( <i>Blumeriella jaapii</i> )                    | D   | 1    | [36]      |
|                              |                          | Leaf curl and witches broom ( <i>Taphrina wiesneri</i> )          | D   | 1    | [36]      |
| <i>Prunus serotina</i>       | black cherry             | Tent caterpillar ( <i>Malacosoma</i> spp.)                        | I/F | 1    | [1,35,37] |
|                              |                          | Bacterial spot ( <i>Xanthomonas campestris</i> pv. <i>pruni</i> ) | D   | 1    | [36]      |

T/G=Taxon/Guild. Taxon: I=insect, D=disease, P=parasitic plant, C=insect and disease multi-agent complex; Guild (for insects): B=phloem- or wood-borers, F=foliage-feeders, S=sap-feeders. Sev.=Severity. Nonnative invasive agents are indicated with \*.

| Host species scientific name  | Host species common name | Agent                                                                                  | T/G | Sev. | Sources      |
|-------------------------------|--------------------------|----------------------------------------------------------------------------------------|-----|------|--------------|
|                               |                          | Black knot ( <i>Apiosporina morbosa</i> )                                              | D   | 1    | [1,36]       |
|                               |                          | Cherry leaf spot ( <i>Blumeriella jaapii</i> )                                         | D   | 1    | [36]         |
|                               |                          | Eastern tent caterpillar ( <i>Malacosoma americanum</i> )                              | I/F | 1    | [1,35,37]    |
| <i>Prunus umbellata</i>       | flatwoods plum           | Black knot ( <i>Apiosporina morbosa</i> )                                              | D   | 1    | [36]         |
|                               |                          | Cherry leaf spot ( <i>Blumeriella jaapii</i> )                                         | D   | 1    | [36]         |
|                               |                          | Eastern tent caterpillar ( <i>Malacosoma americanum</i> )                              | I/F | 1    | [35,37]      |
| <i>Prunus virginiana</i>      | chokecherry              | Prunus X-disease ( <i>Phytoplasma</i> )                                                | D   | 5    | [36,172,173] |
|                               |                          | Black knot ( <i>Apiosporina morbosa</i> )                                              | D   | 3    | [36]         |
|                               |                          | Tent caterpillar ( <i>Malacosoma</i> spp.)                                             | I/F | 3    | [35,37]      |
|                               |                          | Cherry leaf spot ( <i>Blumeriella jaapii</i> )                                         | D   | 1    | [36]         |
| <i>Pseudotsuga macrocarpa</i> | bigcone Douglas-fir      | Flatheaded fir borer ( <i>Melanophila drummondi</i> )                                  | I/B | 3    | [174]        |
|                               |                          | Laminated root rot ( <i>Phellinus sulphurascens</i> )                                  | D   | 3    | [20]         |
|                               |                          | California flatheaded borer ( <i>Melanophila californica</i> )                         | I/B | 1    | [1]          |
| <i>Pseudotsuga menziesii</i>  | Douglas-fir              | Douglas-fir beetle ( <i>Dendroctonus pseudotsugae</i> )                                | I/B | 8    | [37]         |
|                               |                          | Laminated root rot ( <i>Phellinus sulphurascens</i> )                                  | D   | 8    | [20,36]      |
|                               |                          | Armillaria root disease ( <i>Armillaria</i> spp.)                                      | D   | 5    | [36]         |
|                               |                          | Douglas-fir tussock moth ( <i>Orgyia pseudotsugata</i> )                               | I/F | 5    | [1]          |
|                               |                          | Western spruce budworm ( <i>Choristoneura freemani</i> )                               | I/F | 5    | [37]         |
| <i>Psorothamnus spinosus</i>  | smokethorn               | none                                                                                   | .   | .    | .            |
| <i>Quercus acerifolia</i>     | mapleleaf oak            | Oak wilt ( <i>Bretziella fagacearum</i> )*                                             | D   | 5    | [13,34,175]  |
|                               |                          | Gypsy moth ( <i>Lymantria dispar dispar</i> )*                                         | I/F | 3    | [34]         |
|                               |                          | Hypoxyton canker of oak ( <i>Biscogniauxia atropunctata</i> var. <i>atropunctata</i> ) | D   | 1    | [36]         |
| <i>Quercus agrifolia</i>      | California live oak      | Oak wilt ( <i>Bretziella fagacearum</i> )*                                             | D   | 8    | [34]         |
|                               |                          | Sudden oak death ( <i>Phytophthora ramorum</i> )*                                      | D   | 8    | [36]         |
|                               |                          | Goldspotted oak borer ( <i>Agrilus auroguttatus</i> )                                  | I/B | 5    | [176]        |
|                               |                          | Oak pit scale ( <i>Asterolecanium</i> spp.)*                                           | I/S | 3    | [177]        |

T/G=Taxon/Guild. Taxon: I=insect, D=disease, P=parasitic plant, C=insect and disease multi-agent complex; Guild (for insects): B=phloem- or wood-borers, F=foliage-feeders, S=sap-feeders. Sev.=Severity. Nonnative invasive agents are indicated with \*.



| Host species scientific name | Host species common name | Agent                                                                                  | T/G | Sev. | Sources     |
|------------------------------|--------------------------|----------------------------------------------------------------------------------------|-----|------|-------------|
| <i>Quercus alba</i>          | white oak                | Hypoxyton canker of oak ( <i>Biscogniauxia atropunctata</i> var. <i>atropunctata</i> ) | D   | 1    | [36]        |
|                              |                          | Gypsy moth ( <i>Lymantria dispar dispar</i> )*                                         | I/F | 3    | [34]        |
|                              |                          | Oak wilt ( <i>Bretziella fagacearum</i> )*                                             | D   | 3    | [1,34,175]  |
|                              |                          | Twolined chestnut borer ( <i>Agrilus bilineatus</i> )                                  | I/B | 3    | [1,37]      |
|                              |                          | Armillaria root disease ( <i>Armillaria</i> spp.)                                      | D   | 1    | [36]        |
| <i>Quercus arizonica</i>     | Arizona white oak        | Hypoxyton canker of oak ( <i>Biscogniauxia atropunctata</i> var. <i>atropunctata</i> ) | D   | 1    | [36]        |
|                              |                          | Oak wilt ( <i>Bretziella fagacearum</i> )*                                             | D   | 5    | [34]        |
|                              |                          | Armillaria root disease ( <i>Armillaria</i> spp.)                                      | D   | 1    | [36]        |
|                              |                          | Canker rot of oak ( <i>Inonotus andersonii</i> )                                       | D   | 1    | [36]        |
| <i>Quercus arkansana</i>     | Arkansas oak             | Hypoxyton canker of oak ( <i>Biscogniauxia atropunctata</i> var. <i>atropunctata</i> ) | D   | 1    | [36]        |
|                              |                          | Oak wilt ( <i>Bretziella fagacearum</i> )*                                             | D   | 8    | [13,34,175] |
|                              |                          | Gypsy moth ( <i>Lymantria dispar dispar</i> )*                                         | I/F | 3    | [34]        |
|                              |                          | Twolined chestnut borer ( <i>Agrilus bilineatus</i> )                                  | I/B | 3    | [37]        |
|                              |                          | Armillaria root disease ( <i>Armillaria</i> spp.)                                      | D   | 1    | [36]        |
|                              |                          | Hypoxyton canker of oak ( <i>Biscogniauxia atropunctata</i> var. <i>atropunctata</i> ) | D   | 1    | [36]        |
| <i>Quercus bicolor</i>       | swamp white oak          | Oak wilt ( <i>Bretziella fagacearum</i> )*                                             | D   | 5    | [1,34,175]  |
|                              |                          | Gypsy moth ( <i>Lymantria dispar dispar</i> )*                                         | I/F | 3    | [34]        |
|                              |                          | Twolined chestnut borer ( <i>Agrilus bilineatus</i> )                                  | I/B | 3    | [37]        |
|                              |                          | Armillaria root disease ( <i>Armillaria</i> spp.)                                      | D   | 1    | [1,36]      |
|                              |                          | Hypoxyton canker of oak ( <i>Biscogniauxia atropunctata</i> var. <i>atropunctata</i> ) | D   | 1    | [36]        |
| <i>Quercus boyntonii</i>     | Boynton oak              | Oak wilt ( <i>Bretziella fagacearum</i> )*                                             | D   | 8    | [13,34,175] |
|                              |                          | Gypsy moth ( <i>Lymantria dispar dispar</i> )*                                         | I/F | 3    | [34]        |
|                              |                          | Twolined chestnut borer ( <i>Agrilus bilineatus</i> )                                  | I/B | 3    | [37]        |
|                              |                          | Armillaria root disease ( <i>Armillaria</i> spp.)                                      | D   | 1    | [36]        |
|                              |                          | Hypoxyton canker of oak ( <i>Biscogniauxia atropunctata</i> var. <i>atropunctata</i> ) | D   | 1    | [36]        |

T/G=Taxon/Guild. Taxon: I=insect, D=disease, P=parasitic plant, C=insect and disease multi-agent complex; Guild (for insects): B=phloem- or wood-borers, F=foliage-feeders, S=sap-feeders. Sev.=Severity. Nonnative invasive agents are indicated with \*.

| Host species scientific name | Host species common name | Agent                                                                                  | T/G | Sev. | Sources    |
|------------------------------|--------------------------|----------------------------------------------------------------------------------------|-----|------|------------|
| <i>Quercus buckleyi</i>      | Buckley oak              | Oak wilt ( <i>Bretziella fagacearum</i> )*                                             | D   | 8    | [34,175]   |
|                              |                          | Gypsy moth ( <i>Lymantria dispar dispar</i> )*                                         | I/F | 3    | [34]       |
|                              |                          | Twolined chestnut borer ( <i>Agrilus bilineatus</i> )                                  | I/B | 3    | [37]       |
|                              |                          | Armillaria root disease ( <i>Armillaria</i> spp.)                                      | D   | 1    | [36]       |
|                              |                          | Hypoxyton canker of oak ( <i>Biscogniauxia atropunctata</i> var. <i>atropunctata</i> ) | D   | 1    | [36]       |
| <i>Quercus chrysolepis</i>   | canyon live oak          | Oak wilt ( <i>Bretziella fagacearum</i> )*                                             | D   | 8    | [34]       |
|                              |                          | Sudden oak death ( <i>Phytophthora ramorum</i> )*                                      | D   | 8    | [117]      |
|                              |                          | Oak pit scale ( <i>Asterolecanium</i> spp.)*                                           | I/S | 3    | [178]      |
|                              |                          | Goldspotted oak borer ( <i>Agrilus auroguttatus</i> )                                  | I/B | 1    | [176]      |
|                              |                          | Hypoxyton canker of oak ( <i>Biscogniauxia atropunctata</i> var. <i>atropunctata</i> ) | D   | 1    | [36,178]   |
| <i>Quercus coccinea</i>      | scarlet oak              | Oak wilt ( <i>Bretziella fagacearum</i> )*                                             | D   | 8    | [1,34,175] |
|                              |                          | Gypsy moth ( <i>Lymantria dispar dispar</i> )*                                         | I/F | 3    | [34]       |
|                              |                          | Forest tent caterpillar ( <i>Malacosoma disstria</i> )                                 | I/F | 1    | [1]        |
|                              |                          | Hypoxyton canker of oak ( <i>Biscogniauxia atropunctata</i> var. <i>atropunctata</i> ) | D   | 1    | [36]       |
|                              |                          | Walkingstick ( <i>Diaperomera femorata</i> )                                           | I/F | 1    | [1]        |
| <i>Quercus douglasii</i>     | blue oak                 | Oak wilt ( <i>Bretziella fagacearum</i> )*                                             | D   | 5    | [34]       |
|                              |                          | Oak pit scale ( <i>Asterolecanium</i> spp.)*                                           | I/S | 3    | [177,178]  |
|                              |                          | Armillaria root disease ( <i>Armillaria</i> spp.)                                      | D   | 1    | [1,36]     |
|                              |                          | Canker rot of oak ( <i>Inonotus andersonii</i> )                                       | D   | 1    | [36]       |
|                              |                          | Hypoxyton canker of oak ( <i>Biscogniauxia atropunctata</i> var. <i>atropunctata</i> ) | D   | 1    | [36,178]   |
| <i>Quercus ellipsoidalis</i> | northern pin oak         | Oak wilt ( <i>Bretziella fagacearum</i> )*                                             | D   | 8    | [34,175]   |
|                              |                          | Gypsy moth ( <i>Lymantria dispar dispar</i> )*                                         | I/F | 3    | [34]       |
|                              |                          | Twolined chestnut borer ( <i>Agrilus bilineatus</i> )                                  | I/B | 3    | [37]       |
|                              |                          | Armillaria root disease ( <i>Armillaria</i> spp.)                                      | D   | 1    | [36]       |
|                              |                          | Hypoxyton canker of oak ( <i>Biscogniauxia atropunctata</i> var. <i>atropunctata</i> ) | D   | 1    | [36]       |

T/G=Taxon/Guild. Taxon: I=insect, D=disease, P=parasitic plant, C=insect and disease multi-agent complex; Guild (for insects): B=phloem- or wood-borers, F=foliage-feeders, S=sap-feeders. Sev.=Severity. Nonnative invasive agents are indicated with \*.

| Host species scientific name | Host species common name | Agent                                                                                  | T/G | Sev. | Sources     |
|------------------------------|--------------------------|----------------------------------------------------------------------------------------|-----|------|-------------|
| <i>Quercus emoryi</i>        | Emory oak                | Oak wilt ( <i>Bretziella fagacearum</i> )*                                             | D   | 8    | [34,165]    |
|                              |                          | Canker rot of oak ( <i>Inonotus andersonii</i> )                                       | D   | 1    | [36]        |
|                              |                          | Goldspotted oak borer ( <i>Agrilus auroguttatus</i> )                                  | I/B | 1    | [179]       |
|                              |                          | Hypoxylon canker of oak ( <i>Biscogniauxia atropunctata</i> var. <i>atropunctata</i> ) | D   | 1    | [36]        |
| <i>Quercus engelmannii</i>   | Engelmann oak            | Oak wilt ( <i>Bretziella fagacearum</i> )*                                             | D   | 5    | [34]        |
|                              |                          | Oak pit scale ( <i>Asterolecanium</i> spp.)*                                           | I/S | 3    | [178]       |
|                              |                          | Armillaria root disease ( <i>Armillaria</i> spp.)                                      | D   | 1    | [36]        |
|                              |                          | Goldspotted oak borer ( <i>Agrilus auroguttatus</i> )                                  | I/B | 1    | [176]       |
| <i>Quercus falcata</i>       | southern red oak         | Hypoxylon canker of oak ( <i>Biscogniauxia atropunctata</i> var. <i>atropunctata</i> ) | D   | 1    | [36]        |
|                              |                          | Oak wilt ( <i>Bretziella fagacearum</i> )*                                             | D   | 8    | [1,34,175]  |
|                              |                          | Gypsy moth ( <i>Lymantria dispar dispar</i> )*                                         | I/F | 3    | [34]        |
|                              |                          | Sudden oak death ( <i>Phytophthora ramorum</i> )*                                      | D   | 3    | [180]       |
| <i>Quercus gambelii</i>      | Gambel oak               | Twolined chestnut borer ( <i>Agrilus bilineatus</i> )                                  | I/B | 3    | [7,37]      |
|                              |                          | Hypoxylon canker of oak ( <i>Biscogniauxia atropunctata</i> var. <i>atropunctata</i> ) | D   | 1    | [36]        |
|                              |                          | Oak wilt ( <i>Bretziella fagacearum</i> )*                                             | D   | 5    | [34]        |
|                              |                          | Gambel oak borer ( <i>Agrilus quercicola</i> )                                         | I/B | 3    | [181]       |
| <i>Quercus garryana</i>      | Oregon white oak         | Canker rot of oak ( <i>Inonotus andersonii</i> )                                       | D   | 1    | [7]         |
|                              |                          | Hypoxylon canker of oak ( <i>Biscogniauxia atropunctata</i> var. <i>atropunctata</i> ) | D   | 1    | [36]        |
|                              |                          | Oak wilt ( <i>Bretziella fagacearum</i> )*                                             | D   | 5    | [34]        |
|                              |                          | Oak pit scale ( <i>Asterolecanium</i> spp.)*                                           | I/S | 3    | [178]       |
| <i>Quercus georgiana</i>     | Georgia oak              | Armillaria root disease ( <i>Armillaria</i> spp.)                                      | D   | 1    | [1,36]      |
|                              |                          | Eastern mistletoe ( <i>Phoradendron leucarpum</i> )                                    | P   | 1    | [36]        |
|                              |                          | Hypoxylon canker of oak ( <i>Biscogniauxia atropunctata</i> var. <i>atropunctata</i> ) | D   | 1    | [36]        |
|                              |                          | Oak wilt ( <i>Bretziella fagacearum</i> )*                                             | D   | 8    | [13,34,175] |
|                              |                          | Gypsy moth ( <i>Lymantria dispar dispar</i> )*                                         | I/F | 3    | [34]        |

T/G=Taxon/Guild. Taxon: I=insect, D=disease, P=parasitic plant, C=insect and disease multi-agent complex; Guild (for insects): B=ploem- or wood-borers, F=foliage-feeders, S=sap-feeders. Sev.=Severity. Nonnative invasive agents are indicated with \*.

| Host species scientific name | Host species common name | Agent                                                                                  | T/G | Sev. | Sources     |
|------------------------------|--------------------------|----------------------------------------------------------------------------------------|-----|------|-------------|
| <i>Quercus graciliformis</i> | slender oak              | Hypoxyton canker of oak ( <i>Biscogniauxia atropunctata</i> var. <i>atropunctata</i> ) | D   | 1    | [36]        |
|                              |                          | Red oak borer ( <i>Enaphalodes rufulus</i> )                                           | I/B | 1    | [182]       |
|                              |                          | Oak wilt ( <i>Bretziella fagacearum</i> )*                                             | D   | 8    | [13,34,175] |
| <i>Quercus gravesii</i>      | Graves oak               | Hypoxyton canker of oak ( <i>Biscogniauxia atropunctata</i> var. <i>atropunctata</i> ) | D   | 1    | [36]        |
|                              |                          | Oak wilt ( <i>Bretziella fagacearum</i> )*                                             | D   | 8    | [13,34,175] |
|                              |                          | Hypoxyton canker of oak ( <i>Biscogniauxia atropunctata</i> var. <i>atropunctata</i> ) | D   | 1    | [36]        |
| <i>Quercus grisea</i>        | gray oak                 | Red oak borer ( <i>Enaphalodes rufulus</i> )                                           | I/B | 1    | [182]       |
|                              |                          | Oak wilt ( <i>Bretziella fagacearum</i> )*                                             | D   | 5    | [13,34,175] |
|                              |                          | Hypoxyton canker of oak ( <i>Biscogniauxia atropunctata</i> var. <i>atropunctata</i> ) | D   | 1    | [36]        |
| <i>Quercus hypoleucoides</i> | silverleaf oak           | Oak wilt ( <i>Bretziella fagacearum</i> )*                                             | D   | 8    | [34]        |
|                              |                          | Canker rot of oak ( <i>Inonotus andersonii</i> )                                       | D   | 1    | [36]        |
|                              |                          | Goldspotted oak borer ( <i>Agrilus auroguttatus</i> )                                  | I/B | 1    | [179]       |
| <i>Quercus ilicifolia</i>    | scrub oak                | Hypoxyton canker of oak ( <i>Biscogniauxia atropunctata</i> var. <i>atropunctata</i> ) | D   | 1    | [36]        |
|                              |                          | Oak wilt ( <i>Bretziella fagacearum</i> )*                                             | D   | 8    | [34]        |
|                              |                          | Gypsy moth ( <i>Lymantria dispar dispar</i> )*                                         | I/F | 3    | [34]        |
| <i>Quercus imbricaria</i>    | shingle oak              | Hypoxyton canker of oak ( <i>Biscogniauxia atropunctata</i> var. <i>atropunctata</i> ) | D   | 1    | [36]        |
|                              |                          | Oak wilt ( <i>Bretziella fagacearum</i> )*                                             | D   | 8    | [34]        |
|                              |                          | Gypsy moth ( <i>Lymantria dispar dispar</i> )*                                         | I/F | 3    | [34]        |
| <i>Quercus incana</i>        | bluejack oak             | Bacterial leaf scorch ( <i>Xylella fastidiosa</i> )                                    | D   | 1    | [36]        |
|                              |                          | Endothia canker ( <i>Endothia gyrosa</i> )                                             | D   | 1    | [36]        |
|                              |                          | Hypoxyton canker of oak ( <i>Biscogniauxia atropunctata</i> var. <i>atropunctata</i> ) | D   | 1    | [36]        |
|                              |                          | Oak wilt ( <i>Bretziella fagacearum</i> )*                                             | D   | 8    | [34]        |
|                              |                          | Gypsy moth ( <i>Lymantria dispar dispar</i> )*                                         | I/F | 3    | [34]        |
|                              |                          | Twolined chestnut borer ( <i>Agrilus bilineatus</i> )                                  | I/B | 3    | [37]        |
|                              |                          | Bacterial leaf scorch ( <i>Xylella fastidiosa</i> )                                    | D   | 1    | [36]        |

T/G=Taxon/Guild. Taxon: I=insect, D=disease, P=parasitic plant, C=insect and disease multi-agent complex; Guild (for insects): B=phloem- or wood-borers, F=foliage-feeders, S=sap-feeders. Sev.=Severity. Nonnative invasive agents are indicated with \*.

| Host species scientific name | Host species common name | Agent                                                                                  | T/G | Sev. | Sources     |
|------------------------------|--------------------------|----------------------------------------------------------------------------------------|-----|------|-------------|
| <i>Quercus kelloggii</i>     | California black oak     | Hypoxylon canker of oak ( <i>Biscogniauxia atropunctata</i> var. <i>atropunctata</i> ) | D   | 1    | [36]        |
|                              |                          | Oak wilt ( <i>Bretziella fagacearum</i> )*                                             | D   | 8    | [34]        |
|                              |                          | Sudden oak death ( <i>Phytophthora ramorum</i> )*                                      | D   | 8    | [36]        |
|                              |                          | Goldspotted oak borer ( <i>Agrilus auroguttatus</i> )                                  | I/B | 5    | [176]       |
| <i>Quercus laceyi</i>        | Lacey oak                | Oak pit scale ( <i>Asterolecanium</i> spp.)*                                           | I/S | 3    | [1,178]     |
|                              |                          | Hypoxylon canker of oak ( <i>Biscogniauxia atropunctata</i> var. <i>atropunctata</i> ) | D   | 1    | [36]        |
|                              |                          | Oak wilt ( <i>Bretziella fagacearum</i> )*                                             | D   | 5    | [13,34,175] |
|                              |                          | Twolined chestnut borer ( <i>Agrilus bilineatus</i> )                                  | I/B | 3    | [37]        |
| <i>Quercus laevis</i>        | turkey oak               | Hypoxylon canker of oak ( <i>Biscogniauxia atropunctata</i> var. <i>atropunctata</i> ) | D   | 1    | [36]        |
|                              |                          | Oak wilt ( <i>Bretziella fagacearum</i> )*                                             | D   | 8    | [1,34]      |
|                              |                          | Gypsy moth ( <i>Lymantria dispar dispar</i> )*                                         | I/F | 3    | [34]        |
|                              |                          | Bacterial leaf scorch ( <i>Xylella fastidiosa</i> )                                    | D   | 1    | [36]        |
| <i>Quercus laurifolia</i>    | laurel oak               | Canker rot of oak ( <i>Inonotus andersonii</i> )                                       | D   | 1    | [36]        |
|                              |                          | Hypoxylon canker of oak ( <i>Biscogniauxia atropunctata</i> var. <i>atropunctata</i> ) | D   | 1    | [36]        |
|                              |                          | Oak wilt ( <i>Bretziella fagacearum</i> )*                                             | D   | 8    | [34]        |
|                              |                          | Gypsy moth ( <i>Lymantria dispar dispar</i> )*                                         | I/F | 3    | [34]        |
| <i>Quercus lobata</i>        | California white oak     | Twolined chestnut borer ( <i>Agrilus bilineatus</i> )                                  | I/B | 3    | [37]        |
|                              |                          | Bacterial leaf scorch ( <i>Xylella fastidiosa</i> )                                    | D   | 1    | [36]        |
|                              |                          | Hypoxylon canker of oak ( <i>Biscogniauxia atropunctata</i> var. <i>atropunctata</i> ) | D   | 1    | [36]        |
|                              |                          | Oak wilt ( <i>Bretziella fagacearum</i> )*                                             | D   | 5    | [34]        |
| <i>Quercus lyrata</i>        | overcup oak              | Oak pit scale ( <i>Asterolecanium</i> spp.)*                                           | I/S | 3    | [177,178]   |
|                              |                          | Canker rot of oak ( <i>Inonotus andersonii</i> )                                       | D   | 1    | [36]        |
|                              |                          | Hypoxylon canker of oak ( <i>Biscogniauxia atropunctata</i> var. <i>atropunctata</i> ) | D   | 1    | [36,178]    |
|                              |                          | Oak wilt ( <i>Bretziella fagacearum</i> )*                                             | D   | 8    | [34]        |
|                              |                          | Gypsy moth ( <i>Lymantria dispar dispar</i> )*                                         | I/F | 3    | [34]        |

T/G=Taxon/Guild. Taxon: I=insect, D=disease, P=parasitic plant, C=insect and disease multi-agent complex; Guild (for insects): B=phloem- or wood-borers, F=foliage-feeders, S=sap-feeders. Sev.=Severity. Nonnative invasive agents are indicated with \*.

| Host species scientific name | Host species common name | Agent                                                                                  | T/G | Sev. | Sources    |
|------------------------------|--------------------------|----------------------------------------------------------------------------------------|-----|------|------------|
| <i>Quercus macrocarpa</i>    | bur oak                  | Twolined chestnut borer ( <i>Agrilus bilineatus</i> )                                  | I/B | 3    | [37]       |
|                              |                          | Endothia canker ( <i>Endothia gyrosa</i> )                                             | D   | 1    | [36]       |
|                              |                          | Hypoxyton canker of oak ( <i>Biscogniauxia atropunctata</i> var. <i>atropunctata</i> ) | D   | 1    | [36]       |
|                              |                          | Oak wilt ( <i>Bretziella fagacearum</i> )*                                             | D   | 5    | [1,34,175] |
|                              |                          | Gypsy moth ( <i>Lymantria dispar dispar</i> )*                                         | I/F | 3    | [34]       |
|                              |                          | Twolined chestnut borer ( <i>Agrilus bilineatus</i> )                                  | I/B | 3    | [37]       |
| <i>Quercus margaretta</i>    | dwarf post oak           | Bacterial leaf scorch ( <i>Xylella fastidiosa</i> )                                    | D   | 1    | [36]       |
|                              |                          | Bur oak blight ( <i>Tubakia dryina</i> )                                               | D   | 1    | [183]      |
|                              |                          | Oak wilt ( <i>Bretziella fagacearum</i> )*                                             | D   | 5    | [34]       |
|                              |                          | Gypsy moth ( <i>Lymantria dispar dispar</i> )*                                         | I/F | 3    | [34]       |
|                              |                          | Twolined chestnut borer ( <i>Agrilus bilineatus</i> )                                  | I/B | 3    | [37]       |
|                              |                          | Hypoxyton canker of oak ( <i>Biscogniauxia atropunctata</i> var. <i>atropunctata</i> ) | D   | 1    | [36]       |
| <i>Quercus marilandica</i>   | blackjack oak            | Oak wilt ( <i>Bretziella fagacearum</i> )*                                             | D   | 8    | [34,175]   |
|                              |                          | Gypsy moth ( <i>Lymantria dispar dispar</i> )*                                         | I/F | 3    | [34]       |
|                              |                          | Twolined chestnut borer ( <i>Agrilus bilineatus</i> )                                  | I/B | 3    | [37]       |
|                              |                          | Endothia canker ( <i>Endothia gyrosa</i> )                                             | D   | 1    | [36]       |
|                              |                          | Hypoxyton canker of oak ( <i>Biscogniauxia atropunctata</i> var. <i>atropunctata</i> ) | D   | 1    | [36]       |
|                              |                          | Oak wilt ( <i>Bretziella fagacearum</i> )*                                             | D   | 5    | [34]       |
| <i>Quercus michauxii</i>     | swamp chestnut oak       | Gypsy moth ( <i>Lymantria dispar dispar</i> )*                                         | I/F | 3    | [34]       |
|                              |                          | Twolined chestnut borer ( <i>Agrilus bilineatus</i> )                                  | I/B | 3    | [37]       |
|                              |                          | Hypoxyton canker of oak ( <i>Biscogniauxia atropunctata</i> var. <i>atropunctata</i> ) | D   | 1    | [36]       |
|                              |                          | Red oak borer ( <i>Enaphalodes rufulus</i> )                                           | I/B | 1    | [1]        |
|                              |                          | Oak wilt ( <i>Bretziella fagacearum</i> )*                                             | D   | 5    | [34]       |
|                              |                          | Gypsy moth ( <i>Lymantria dispar dispar</i> )*                                         | I/F | 3    | [34]       |
| <i>Quercus minima</i>        | dwarf live oak           | Twolined chestnut borer ( <i>Agrilus bilineatus</i> )                                  | I/B | 3    | [37]       |

T/G=Taxon/Guild. Taxon: I=insect, D=disease, P=parasitic plant, C=insect and disease multi-agent complex; Guild (for insects): B=phloem- or wood-borers, F=foliage-feeders, S=sap-feeders. Sev.=Severity. Nonnative invasive agents are indicated with \*.

| Host species scientific name  | Host species common name | Agent                                                                                  | T/G | Sev. | Sources     |
|-------------------------------|--------------------------|----------------------------------------------------------------------------------------|-----|------|-------------|
| <i>Quercus muehlenbergii</i>  | chinkapin oak            | Hypoxylon canker of oak ( <i>Biscogniauxia atropunctata</i> var. <i>atropunctata</i> ) | D   | 1    | [36]        |
|                               |                          | Oak wilt ( <i>Bretziella fagacearum</i> )*                                             | D   | 8    | [1,34]      |
|                               |                          | Gypsy moth ( <i>Lymantria dispar dispar</i> )*                                         | I/F | 3    | [34]        |
|                               |                          | Twolined chestnut borer ( <i>Agrilus bilineatus</i> )                                  | I/B | 3    | [37]        |
| <i>Quercus myrtifolia</i>     | myrtle oak               | Hypoxylon canker of oak ( <i>Biscogniauxia atropunctata</i> var. <i>atropunctata</i> ) | D   | 1    | [36]        |
|                               |                          | Oak wilt ( <i>Bretziella fagacearum</i> )*                                             | D   | 5    | [13,34,175] |
|                               |                          | Gypsy moth ( <i>Lymantria dispar dispar</i> )*                                         | I/F | 3    | [34]        |
|                               |                          | Hypoxylon canker of oak ( <i>Biscogniauxia atropunctata</i> var. <i>atropunctata</i> ) | D   | 1    | [36]        |
| <i>Quercus nigra</i>          | water oak                | Red oak borer ( <i>Enaphalodes rufulus</i> )                                           | I/B | 1    | [182]       |
|                               |                          | Oak wilt ( <i>Bretziella fagacearum</i> )*                                             | D   | 8    | [34]        |
|                               |                          | Gypsy moth ( <i>Lymantria dispar dispar</i> )*                                         | I/F | 3    | [34]        |
|                               |                          | Twolined chestnut borer ( <i>Agrilus bilineatus</i> )                                  | I/B | 3    | [37]        |
|                               |                          | Hispidus canker ( <i>Inonotus hispidus</i> )                                           | D   | 1    | [36]        |
|                               |                          | Hypoxylon canker of oak ( <i>Biscogniauxia atropunctata</i> var. <i>atropunctata</i> ) | D   | 1    | [36]        |
| <i>Quercus oblongifolia</i>   | Mexican blue oak         | Oak wilt ( <i>Bretziella fagacearum</i> )*                                             | D   | 8    | [34]        |
|                               |                          | Canker rot of oak ( <i>Inonotus andersonii</i> )                                       | D   | 1    | [36]        |
|                               |                          | Eastern mistletoe ( <i>Phoradendron leucarpum</i> )                                    | P   | 1    | [36]        |
|                               |                          | Hypoxylon canker of oak ( <i>Biscogniauxia atropunctata</i> var. <i>atropunctata</i> ) | D   | 1    | [36]        |
|                               |                          | Oak wilt ( <i>Bretziella fagacearum</i> )*                                             | D   | 5    | [34]        |
| <i>Quercus oglethorpensis</i> | Oglethorpe oak           | Gypsy moth ( <i>Lymantria dispar dispar</i> )*                                         | I/F | 3    | [34]        |
|                               |                          | Hypoxylon canker of oak ( <i>Biscogniauxia atropunctata</i> var. <i>atropunctata</i> ) | D   | 1    | [36]        |
|                               |                          | Oak wilt ( <i>Bretziella fagacearum</i> )*                                             | D   | 8    | [1,34]      |
| <i>Quercus pagoda</i>         | cherrybark oak           | Gypsy moth ( <i>Lymantria dispar dispar</i> )*                                         | I/F | 3    | [34]        |
|                               |                          | Twolined chestnut borer ( <i>Agrilus bilineatus</i> )                                  | I/B | 3    | [37]        |
|                               |                          | Hispidus canker ( <i>Inonotus hispidus</i> )                                           | D   | 1    | [36]        |
|                               |                          |                                                                                        |     |      |             |

T/G=Taxon/Guild. Taxon: I=insect, D=disease, P=parasitic plant, C=insect and disease multi-agent complex; Guild (for insects): B=phloem- or wood-borers, F=foliage-feeders, S=sap-feeders. Sev.=Severity. Nonnative invasive agents are indicated with \*.

| Host species scientific name | Host species common name | Agent                                                                                  | T/G | Sev. | Sources     |
|------------------------------|--------------------------|----------------------------------------------------------------------------------------|-----|------|-------------|
| <i>Quercus palustris</i>     | pin oak                  | Hypoxyton canker of oak ( <i>Biscogniauxia atropunctata</i> var. <i>atropunctata</i> ) | D   | 1    | [36]        |
|                              |                          | Oak wilt ( <i>Bretziella fagacearum</i> )*                                             | D   | 8    | [1,34]      |
|                              |                          | Gypsy moth ( <i>Lymantria dispar dispar</i> )*                                         | I/F | 3    | [34]        |
|                              |                          | Endothia canker ( <i>Endothia gyrosa</i> )                                             | D   | 1    | [36]        |
| <i>Quercus phellos</i>       | willow oak               | Hypoxyton canker of oak ( <i>Biscogniauxia atropunctata</i> var. <i>atropunctata</i> ) | D   | 1    | [36]        |
|                              |                          | Red oak borer ( <i>Enaphalodes rufulus</i> )                                           | I/B | 1    | [182]       |
|                              |                          | Oak wilt ( <i>Bretziella fagacearum</i> )*                                             | D   | 5    | [34]        |
|                              |                          | Fall cankerworm ( <i>Alsophila pometaria</i> )                                         | I/F | 3    | [184]       |
|                              |                          | Gypsy moth ( <i>Lymantria dispar dispar</i> )*                                         | I/F | 3    | [34]        |
|                              |                          | Endothia canker ( <i>Endothia gyrosa</i> )                                             | D   | 1    | [36]        |
| <i>Quercus polymorpha</i>    | Mexican white oak        | Hispidus canker ( <i>Inonotus hispidus</i> )                                           | D   | 1    | [36]        |
|                              |                          | Oak wilt ( <i>Bretziella fagacearum</i> )*                                             | D   | 5    | [13,34,175] |
| <i>Quercus prinoides</i>     | dwarf chinquapin oak     | Hypoxyton canker of oak ( <i>Biscogniauxia atropunctata</i> var. <i>atropunctata</i> ) | D   | 1    | [36]        |
|                              |                          | Oak wilt ( <i>Bretziella fagacearum</i> )*                                             | D   | 5    | [34]        |
| <i>Quercus prinus</i>        | chestnut oak             | Gypsy moth ( <i>Lymantria dispar dispar</i> )*                                         | I/F | 3    | [34]        |
|                              |                          | Hypoxyton canker of oak ( <i>Biscogniauxia atropunctata</i> var. <i>atropunctata</i> ) | D   | 1    | [36]        |
|                              |                          | Oak wilt ( <i>Bretziella fagacearum</i> )*                                             | D   | 5    | [1,34]      |
|                              |                          | Gypsy moth ( <i>Lymantria dispar dispar</i> )*                                         | I/F | 3    | [34]        |
| <i>Quercus pungens</i>       | sandpaper oak            | Twolined chestnut borer ( <i>Agrilus bilineatus</i> )                                  | I/B | 3    | [37]        |
|                              |                          | Endothia canker ( <i>Endothia gyrosa</i> )                                             | D   | 1    | [36]        |
|                              |                          | Hypoxyton canker of oak ( <i>Biscogniauxia atropunctata</i> var. <i>atropunctata</i> ) | D   | 1    | [36]        |
|                              |                          | Oak wilt ( <i>Bretziella fagacearum</i> )*                                             | D   | 5    | [13,34,175] |
|                              |                          | Hypoxyton canker of oak ( <i>Biscogniauxia atropunctata</i> var. <i>atropunctata</i> ) | D   | 1    | [36]        |
| <i>Quercus rubra</i>         | northern red oak         | Oak wilt ( <i>Bretziella fagacearum</i> )*                                             | D   | 8    | [1,34,175]  |
|                              |                          | Gypsy moth ( <i>Lymantria dispar dispar</i> )*                                         | I/F | 3    | [34]        |

T/G=Taxon/Guild. Taxon: I=insect, D=disease, P=parasitic plant, C=insect and disease multi-agent complex; Guild (for insects): B=phloem- or wood-borers, F=foliage-feeders, S=sap-feeders. Sev.=Severity. Nonnative invasive agents are indicated with \*.



| Host species scientific name | Host species common name | Agent                                                                                  | T/G | Sev. | Sources     |
|------------------------------|--------------------------|----------------------------------------------------------------------------------------|-----|------|-------------|
| <i>Quercus rugosa</i>        | netleaf oak              | Red oak borer ( <i>Enaphalodes rufulus</i> )                                           | I/B | 3    | [182]       |
|                              |                          | Twolined chestnut borer ( <i>Agrilus bilineatus</i> )                                  | I/B | 3    | [37]        |
|                              |                          | Endothia canker ( <i>Endothia gyrosa</i> )                                             | D   | 1    | [36]        |
|                              |                          | Oak wilt ( <i>Bretziella fagacearum</i> )*                                             | D   | 5    | [13,34,175] |
| <i>Quercus shumardii</i>     | Shumard oak              | Hypoxyton canker of oak ( <i>Biscogniauxia atropunctata</i> var. <i>atropunctata</i> ) | D   | 1    | [36]        |
|                              |                          | Oak wilt ( <i>Bretziella fagacearum</i> )*                                             | D   | 8    | [1,34,175]  |
|                              |                          | Gypsy moth ( <i>Lymantria dispar dispar</i> )*                                         | I/F | 3    | [34]        |
| <i>Quercus similis</i>       | Delta post oak           | Hypoxyton canker of oak ( <i>Biscogniauxia atropunctata</i> var. <i>atropunctata</i> ) | D   | 1    | [36]        |
|                              |                          | Red oak borer ( <i>Enaphalodes rufulus</i> )                                           | I/B | 1    | [1]         |
|                              |                          | Twolined chestnut borer ( <i>Agrilus bilineatus</i> )                                  | I/B | 1    | [1]         |
|                              |                          | Oak wilt ( <i>Bretziella fagacearum</i> )*                                             | D   | 5    | [34]        |
|                              |                          | Gypsy moth ( <i>Lymantria dispar dispar</i> )*                                         | I/F | 3    | [34]        |
|                              |                          | Hypoxyton canker of oak ( <i>Biscogniauxia atropunctata</i> var. <i>atropunctata</i> ) | D   | 1    | [36]        |
|                              |                          | Red oak borer ( <i>Enaphalodes rufulus</i> )                                           | I/B | 1    | [182]       |
| <i>Quercus sinuata</i>       | Durand oak               | Twolined chestnut borer ( <i>Agrilus bilineatus</i> )                                  | I/B | 1    | [185]       |
|                              |                          | Oak wilt ( <i>Bretziella fagacearum</i> )*                                             | D   | 5    | [34]        |
|                              |                          | Gypsy moth ( <i>Lymantria dispar dispar</i> )*                                         | I/F | 3    | [34]        |
|                              |                          | Twolined chestnut borer ( <i>Agrilus bilineatus</i> )                                  | I/B | 3    | [37]        |
| <i>Quercus stellata</i>      | post oak                 | Hypoxyton canker of oak ( <i>Biscogniauxia atropunctata</i> var. <i>atropunctata</i> ) | D   | 1    | [36]        |
|                              |                          | Oak wilt ( <i>Bretziella fagacearum</i> )*                                             | D   | 5    | [1,34]      |
|                              |                          | Gypsy moth ( <i>Lymantria dispar dispar</i> )*                                         | I/F | 3    | [34]        |
|                              |                          | Twolined chestnut borer ( <i>Agrilus bilineatus</i> )                                  | I/B | 3    | [37]        |
|                              |                          | Armillaria root disease ( <i>Armillaria</i> spp.)                                      | D   | 1    | [36]        |
| <i>Quercus texana</i>        | Nutall oak               | Red oak borer ( <i>Enaphalodes rufulus</i> )                                           | I/B | 1    | [182]       |
|                              |                          | Oak wilt ( <i>Bretziella fagacearum</i> )*                                             | D   | 8    | [1]         |

T/G=Taxon/Guild. Taxon: I=insect, D=disease, P=parasitic plant, C=insect and disease multi-agent complex; Guild (for insects): B=phloem- or wood-borers, F=foliage-feeders, S=sap-feeders. Sev.=Severity. Nonnative invasive agents are indicated with \*.

| Host species scientific name | Host species common name | Agent                                                                                  | T/G | Sev. | Sources     |
|------------------------------|--------------------------|----------------------------------------------------------------------------------------|-----|------|-------------|
| <i>Quercus tomentella</i>    | island live oak          | Gypsy moth ( <i>Lymantria dispar dispar</i> )*                                         | I/F | 3    | [34]        |
|                              |                          | Twolined chestnut borer ( <i>Agrilus bilineatus</i> )                                  | I/B | 3    | [37]        |
|                              |                          | Butt rot ( <i>Hericium erinaceus</i> )                                                 | D   | 1    | [36]        |
|                              |                          | Hypoxylon canker of oak ( <i>Biscogniauxia atropunctata</i> var. <i>atropunctata</i> ) | D   | 1    | [36]        |
|                              |                          | Oak wilt ( <i>Bretziella fagacearum</i> )*                                             | D   | 8    | [13,34,175] |
|                              |                          | Oak pit scale ( <i>Asterolecanium</i> spp.)*                                           | I/S | 3    | [178]       |
| <i>Quercus velutina</i>      | black oak                | Hypoxylon canker of oak ( <i>Biscogniauxia atropunctata</i> var. <i>atropunctata</i> ) | D   | 1    | [36]        |
|                              |                          | Oak wilt ( <i>Bretziella fagacearum</i> )*                                             | D   | 8    | [1,34,175]  |
|                              |                          | Gypsy moth ( <i>Lymantria dispar dispar</i> )*                                         | I/F | 3    | [34]        |
|                              |                          | Twolined chestnut borer ( <i>Agrilus bilineatus</i> )                                  | I/B | 3    | [37]        |
| <i>Quercus virginiana</i>    | live oak                 | Hypoxylon canker of oak ( <i>Biscogniauxia atropunctata</i> var. <i>atropunctata</i> ) | D   | 1    | [36]        |
|                              |                          | Red oak borer ( <i>Enaphalodes rufulus</i> )                                           | I/B | 1    | [1]         |
|                              |                          | Oak wilt ( <i>Bretziella fagacearum</i> )*                                             | D   | 8    | [1,34,175]  |
|                              |                          | Gypsy moth ( <i>Lymantria dispar dispar</i> )*                                         | I/F | 3    | [34]        |
|                              |                          | Twolined chestnut borer ( <i>Agrilus bilineatus</i> )                                  | I/B | 3    | [37]        |
|                              |                          | Bacterial leaf scorch ( <i>Xylella fastidiosa</i> )                                    | D   | 1    | [186]       |
| <i>Quercus wislizeni</i>     | interior live oak        | Bot canker ( <i>Botryosphaeria corticola</i> )                                         | D   | 1    | [186]       |
|                              |                          | Oak wilt ( <i>Bretziella fagacearum</i> )*                                             | D   | 8    | [34]        |
|                              |                          | Goldspotted oak borer ( <i>Agrilus auroguttatus</i> )                                  | I/B | 3    | [179]       |
|                              |                          | Oak pit scale ( <i>Asterolecanium</i> spp.)*                                           | I/S | 3    | [178]       |
|                              |                          | Hypoxylon canker of oak ( <i>Biscogniauxia atropunctata</i> var. <i>atropunctata</i> ) | D   | 1    | [36]        |
| <i>Rhizophora mangle</i>     | American mangrove        | Wood borer ( <i>Sphaeroma terebrans</i> )*                                             | I/B | 5    | [187]       |
|                              |                          | Gall disease ( <i>Cylindrocarpon didymum</i> )                                         | D   | 1    | [188,189]   |
|                              |                          | Wood borer ( <i>Coccotrypes rhizophorae</i> )*                                         | I/B | 1    | [188,190]   |
| <i>Rhus typhina</i>          | staghorn sumac           | Fusarium wilt ( <i>Fusarium oxysporum</i> f. sp. <i>rhois</i> )                        | D   | 3    | [36]        |

T/G=Taxon/Guild. Taxon: I=insect, D=disease, P=parasitic plant, C=insect and disease multi-agent complex; Guild (for insects): B=phloem- or wood-borers, F=foliage-feeders, S=sap-feeders. Sev.=Severity. Nonnative invasive agents are indicated with \*.

| Host species scientific name | Host species common name | Agent                                                                                          | T/G | Sev. | Sources |
|------------------------------|--------------------------|------------------------------------------------------------------------------------------------|-----|------|---------|
| <i>Robinia neomexicana</i>   | New Mexico locust        | Heart rot fungi ( <i>Phellinus robiniae</i> )                                                  | D   | 1    | [36]    |
|                              |                          | Locust borer ( <i>Megacyllene robiniae</i> )                                                   | I/B | 1    | [37]    |
|                              |                          | Locust leafminer ( <i>Odontota dorsalis</i> )                                                  | I/F | 1    | [1]     |
| <i>Robinia pseudoacacia</i>  | black locust             | Heart rot fungi ( <i>Phellinus robiniae</i> )                                                  | D   | 1    | [36]    |
|                              |                          | Locust borer ( <i>Megacyllene robiniae</i> )                                                   | I/B | 1    | [1]     |
|                              |                          | Locust leafminer ( <i>Odontota dorsalis</i> )                                                  | I/F | 1    | [1]     |
|                              |                          | Locust twig borer ( <i>Ecdytolopha insiticihana</i> )                                          | I/B | 1    | [1]     |
|                              |                          | Stunt nematode ( <i>Tylenchorhynchus</i> spp.)                                                 | D   | 1    | [36]    |
| <i>Roystonea regia</i>       | Florida royal palm       | Thielaviopsis trunk rot ( <i>Thielaviopsis paradoxa</i> )                                      | D   | 3    | [191]   |
|                              |                          | Ganoderma butt rot ( <i>Ganoderma zonatum</i> )                                                | D   | 1    | [191]   |
|                              |                          | Royal palm bug ( <i>Xylastodoris luteolus</i> )                                                | I/S | 1    | [191]   |
| <i>Sabal mexicana</i>        | Mexican palmetto         | Texas Phoenix palm decline (Candidatus <i>Phytoplasma palmae</i> )                             | D   | 5    | [192]   |
|                              |                          | Thielaviopsis trunk rot ( <i>Thielaviopsis paradoxa</i> )                                      | D   | 5    | [192]   |
|                              |                          | White mottled rot ( <i>Ganoderma</i> spp.)                                                     | D   | 1    | [192]   |
| <i>Sabal palmetto</i>        | cabbage palmetto         | Texas Phoenix palm decline (Candidatus <i>Phytoplasma palmae</i> )                             | D   | 5    | [192]   |
|                              |                          | Thielaviopsis trunk rot ( <i>Thielaviopsis paradoxa</i> )                                      | D   | 5    | [192]   |
|                              |                          | White mottled rot ( <i>Ganoderma</i> spp.)                                                     | D   | 1    | [192]   |
| <i>Salix alaxensis</i>       | feltleaf willow          | Scab and black canker of willow ( <i>Venturia saliciperda</i> / <i>Glomerella miyabeana</i> )* | D   | 3    | [34]    |
|                              |                          | Asian longhorned beetle ( <i>Anoplophora glabripennis</i> )*                                   | I/B | 1    | [34]    |
| <i>Salix amygdaloides</i>    | peachleaf willow         | Gypsy moth ( <i>Lymantria dispar dispar</i> )*                                                 | I/F | 3    | [34]    |
|                              |                          | Scab and black canker of willow ( <i>Venturia saliciperda</i> / <i>Glomerella miyabeana</i> )* | D   | 3    | [36]    |
|                              |                          | Artist's conk ( <i>Ganoderma applanatum</i> )                                                  | D   | 1    | [36]    |
|                              |                          | Asian longhorned beetle ( <i>Anoplophora glabripennis</i> )*                                   | I/B | 1    | [34]    |
| <i>Salix arbusculoides</i>   | peachleaf willow         | Scab and black canker of willow ( <i>Venturia saliciperda</i> / <i>Glomerella miyabeana</i> )* | D   | 3    | [34]    |

T/G=Taxon/Guild. Taxon: I=insect, D=disease, P=parasitic plant, C=insect and disease multi-agent complex; Guild (for insects): B=phloem- or wood-borers, F=foliage-feeders, S=sap-feeders. Sev.=Severity. Nonnative invasive agents are indicated with \*.

| Host species scientific name              | Host species common name | Agent                                                                                          | T/G | Sev. | Sources |
|-------------------------------------------|--------------------------|------------------------------------------------------------------------------------------------|-----|------|---------|
| <i>Salix bebbiana</i>                     | Bebb willow              | Asian longhorned beetle ( <i>Anoplophora glabripennis</i> )*                                   | I/B | 1    | [34]    |
|                                           |                          | Gypsy moth ( <i>Lymantria dispar dispar</i> )*                                                 | I/F | 3    | [34]    |
|                                           |                          | Scab and black canker of willow ( <i>Venturia saliciperda</i> / <i>Glomerella miyabeana</i> )* | D   | 3    | [36]    |
|                                           |                          | Artist's conk ( <i>Ganoderma applanatum</i> )                                                  | D   | 1    | [36]    |
|                                           |                          | Asian longhorned beetle ( <i>Anoplophora glabripennis</i> )*                                   | I/B | 1    | [34]    |
| <i>Salix bonplandiana</i>                 | Bonpland willow          | Willow witches'-broom ( <i>Phytoplasma</i> , members of the yellows group)                     | D   | 1    | [36]    |
|                                           |                          | Scab and black canker of willow ( <i>Venturia saliciperda</i> / <i>Glomerella miyabeana</i> )* | D   | 3    | [34]    |
|                                           |                          | Asian longhorned beetle ( <i>Anoplophora glabripennis</i> )*                                   | I/B | 1    | [34]    |
| <i>Salix caroliniana</i>                  | coastal plain willow     | Gypsy moth ( <i>Lymantria dispar dispar</i> )*                                                 | I/F | 3    | [34]    |
|                                           |                          | Scab and black canker of willow ( <i>Venturia saliciperda</i> / <i>Glomerella miyabeana</i> )* | D   | 3    | [34]    |
| <i>Salix laevigata</i>                    | red willow               | Asian longhorned beetle ( <i>Anoplophora glabripennis</i> )*                                   | I/B | 1    | [34]    |
|                                           |                          | Polyphagous shot hole borer ( <i>Euvallancea</i> spp.)*                                        | I/B | 5    | [193]   |
|                                           |                          | Scab and black canker of willow ( <i>Venturia saliciperda</i> / <i>Glomerella miyabeana</i> )* | D   | 3    | [34]    |
|                                           |                          | Artist's conk ( <i>Ganoderma applanatum</i> )                                                  | D   | 1    | [36]    |
|                                           |                          | Asian longhorned beetle ( <i>Anoplophora glabripennis</i> )*                                   | I/B | 1    | [34]    |
| <i>Salix lasiolepis</i>                   | arroyo willow            | Polyphagous shot hole borer ( <i>Euvallancea</i> spp.)*                                        | I/B | 5    | [162]   |
|                                           |                          | Scab and black canker of willow ( <i>Venturia saliciperda</i> / <i>Glomerella miyabeana</i> )* | D   | 3    | [34]    |
|                                           |                          | Artist's conk ( <i>Ganoderma applanatum</i> )                                                  | D   | 1    | [36]    |
|                                           |                          | Asian longhorned beetle ( <i>Anoplophora glabripennis</i> )*                                   | I/B | 1    | [34]    |
| <i>Salix lucida</i> ssp. <i>lasiandra</i> | Pacific willow           | Scab and black canker of willow ( <i>Venturia saliciperda</i> / <i>Glomerella miyabeana</i> )* | D   | 3    | [34]    |
|                                           |                          | Artist's conk ( <i>Ganoderma applanatum</i> )                                                  | D   | 1    | [36]    |
|                                           |                          | Asian longhorned beetle ( <i>Anoplophora glabripennis</i> )*                                   | I/B | 1    | [34]    |

T/G=Taxon/Guild. Taxon: I=insect, D=disease, P=parasitic plant, C=insect and disease multi-agent complex; Guild (for insects): B=phloem- or wood-borers, F=foliage-feeders, S=sap-feeders. Sev.=Severity. Nonnative invasive agents are indicated with \*.

| Host species scientific name | Host species common name | Agent                                                                                             | T/G | Sev. | Sources     |
|------------------------------|--------------------------|---------------------------------------------------------------------------------------------------|-----|------|-------------|
| <i>Salix nigra</i>           | black willow             | Gypsy moth ( <i>Lymantria dispar dispar</i> )*                                                    | I/F | 3    | [34]        |
|                              |                          | Polyphagous shot hole borer ( <i>Euvallancea</i> spp.)*                                           | I/B | 3    | [162]       |
|                              |                          | Scab and black canker of willow ( <i>Venturia saliciperda</i> / <i>Glomerella miyabeana</i> )*    | D   | 3    | [36]        |
|                              |                          | Asian longhorned beetle ( <i>Anoplophora glabripennis</i> )*                                      | I/B | 1    | [34]        |
|                              |                          | Willow witches'-broom ( <i>Phytoplasma</i> , members of the yellows group)                        | D   | 1    | [36]        |
| <i>Salix pyrifolia</i>       | balsam willow            | Gypsy moth ( <i>Lymantria dispar dispar</i> )*                                                    | I/F | 3    | [34]        |
|                              |                          | Scab and black canker of willow ( <i>Venturia saliciperda</i> / <i>Glomerella miyabeana</i> )*    | D   | 3    | [34]        |
|                              |                          | Asian longhorned beetle ( <i>Anoplophora glabripennis</i> )*                                      | I/B | 1    | [34]        |
| <i>Salix scouleriana</i>     | Scouler's willow         | Scab and black canker of willow ( <i>Venturia saliciperda</i> / <i>Glomerella miyabeana</i> )*    | D   | 3    | [34]        |
|                              |                          | Artist's conk ( <i>Ganoderma applanatum</i> )                                                     | D   | 1    | [36]        |
|                              |                          | Asian longhorned beetle ( <i>Anoplophora glabripennis</i> )*                                      | I/B | 1    | [34]        |
|                              |                          | Scab and black canker of willow ( <i>Venturia saliciperda</i> / <i>Glomerella miyabeana</i> )*    | D   | 3    | [34]        |
| <i>Salix taxifolia</i>       | yewleaf willow           | Asian longhorned beetle ( <i>Anoplophora glabripennis</i> )*                                      | I/B | 1    | [34]        |
|                              |                          | Soapberry borer ( <i>Agrilus prionurus</i> )*                                                     | I/B | 8    | [34,194]    |
| <i>Sapindus drummondii</i>   | western soapberry        | Laurel wilt ( <i>Raffaelea lauricola</i> )/redbay ambrosia beetle ( <i>Xyleborus glabratus</i> )* | C   | 8    | [34,37,195] |
| <i>Sassafras albidum</i>     | sassafras                | Ganoderma rot of hardwoods ( <i>Ganoderma lucidum</i> )                                           | D   | 1    | [36]        |
|                              |                          | Japanese beetle ( <i>Popillia japonica</i> )*                                                     | I/F | 1    | [1]         |
|                              |                          | Verticillium wilt ( <i>Verticillium albo-atrum</i> )                                              | D   | 1    | [35]        |
|                              |                          | Witches'-broom ( <i>Apiosporina collinsii</i> )                                                   | D   | 1    | [36]        |
|                              |                          | Brown cubical rot ( <i>Poria sequoiae</i> )                                                       | D   | 1    | [1]         |
| <i>Sequoia sempervirens</i>  | coast redwood            | Cercospora blight ( <i>Asperisporium sequoiae</i> )                                               | D   | 1    | [13,36,124] |
|                              |                          | Heterobasidion root disease ( <i>Heterobasidion</i> spp.)                                         | D   | 1    | [36]        |
|                              |                          | Sudden oak death ( <i>Phytophthora ramorum</i> )*                                                 | D   | 1    | [36]        |
|                              |                          |                                                                                                   |     |      |             |

T/G=Taxon/Guild. Taxon: I=insect, D=disease, P=parasitic plant, C=insect and disease multi-agent complex; Guild (for insects): B=phloem- or wood-borers, F=foliage-feeders, S=sap-feeders. Sev.=Severity. Nonnative invasive agents are indicated with \*.

| Host species scientific name     | Host species common name | Agent                                                       | T/G | Sev. | Sources     |
|----------------------------------|--------------------------|-------------------------------------------------------------|-----|------|-------------|
|                                  |                          | White ring rot ( <i>Obba rivulosa</i> )                     | D   | 1    | [1]         |
| <i>Sequoiadendron giganteum</i>  | giant sequoia            | Cercospora blight ( <i>Asperisporium sequoiae</i> )         | D   | 1    | [13,36,124] |
|                                  |                          | Heterobasidion root disease ( <i>Heterobasidion</i> spp.)   | D   | 1    | [36]        |
| <i>Sideroxylon foetidissimum</i> | false mastic             | False-mastic psylla ( <i>Ceropsylla sideroxyli</i> )        | I/S | 1    | [196]       |
|                                  |                          | Lobate lac scale ( <i>Paratachardina pseudolobata</i> )*    | I/S | 1    | [97,197]    |
| <i>Sideroxylon lanuginosum</i>   | gum bumelia              | none                                                        | .   | .    | .           |
| <i>Sideroxylon lycioides</i>     | buckthorn bumelia        | none                                                        | .   | .    | .           |
| <i>Sideroxylon salicifolium</i>  | white bully              | Lobate lac scale ( <i>Paratachardina pseudolobata</i> )*    | I/S | 1    | [97,197]    |
| <i>Simarouba glauca</i>          | paradise-tree            | none                                                        | .   | .    | .           |
| <i>Sophora affinis</i>           | Texas sophora            | none                                                        | .   | .    | .           |
| <i>Sorbus americana</i>          | American mountain-ash    | Fire blight ( <i>Erwinia amylovora</i> )                    | D   | 3    | [36]        |
|                                  |                          | Gypsy moth ( <i>Lymantria dispar dispar</i> )*              | I/F | 3    | [34]        |
| <i>Sorbus decora</i>             | northern mountain-ash    | Fire blight ( <i>Erwinia amylovora</i> )                    | D   | 3    | [36]        |
|                                  |                          | Gypsy moth ( <i>Lymantria dispar dispar</i> )*              | I/F | 3    | [34]        |
| <i>Stewartia ovata</i>           | mountain camellia        | none                                                        | .   | .    | .           |
| <i>Swietenia mahagoni</i>        | West Indian mahogany     | Mahogany shoot borer ( <i>Hypsipyla grandella</i> )         | I/B | 1    | [37]        |
|                                  |                          | Nectria canker ( <i>Nectria ditissima</i> )                 | D   | 1    | [36]        |
| <i>Taxodium ascendens</i>        | pondcypress              | Bagworm ( <i>Thyridopteryx ephemeraeformis</i> )            | I/F | 1    | [37]        |
|                                  |                          | Cypress looper ( <i>Anacamptodes pergracilus</i> )          | I/F | 1    | [1,198]     |
|                                  |                          | Southern cypress bark beetle ( <i>Phloeosinus taxodii</i> ) | I/B | 1    | [1]         |
| <i>Taxodium distichum</i>        | baldcypress              | Baldcypress leafroller ( <i>Archips goyerana</i> )          | I/F | 1    | [1]         |
|                                  |                          | Cercospora blight ( <i>Asperisporium sequoiae</i> )         | D   | 1    | [36,124]    |
|                                  |                          | Cypress looper ( <i>Anacamptodes pergracilus</i> )          | I/F | 1    | [1,198]     |
|                                  |                          | Southern cypress bark beetle ( <i>Phloeosinus taxodii</i> ) | I/B | 1    | [1]         |
| <i>Taxodium mucronatum</i>       | Montezuma baldcypress    | Southern cypress bark beetle ( <i>Phloeosinus taxodii</i> ) | I/B | 1    | [1]         |

T/G=Taxon/Guild. Taxon: I=insect, D=disease, P=parasitic plant, C=insect and disease multi-agent complex; Guild (for insects): B=phloem- or wood-borers, F=foliage-feeders, S=sap-feeders. Sev.=Severity. Nonnative invasive agents are indicated with \*.

| Host species scientific name                    | Host species common name    | Agent                                                             | T/G | Sev. | Sources  |
|-------------------------------------------------|-----------------------------|-------------------------------------------------------------------|-----|------|----------|
| <i>Taxus brevifolia</i>                         | Pacific yew                 | White mottled rot ( <i>Ganoderma</i> spp.)                        | D   | 1    | [36]     |
|                                                 |                             | Black vine weevil ( <i>Otiorhynchus sulcatus</i> )*               | I/F | 1    | [34]     |
|                                                 |                             | Heterobasidion root disease ( <i>Heterobasidion</i> spp.)         | D   | 1    | [36]     |
|                                                 |                             | Port-Orford-cedar root disease ( <i>Phytophthora lateralis</i> )* | D   | 1    | [35,90]  |
| <i>Taxus floridana</i>                          | Florida yew                 | Black vine weevil ( <i>Otiorhynchus sulcatus</i> )*               | I/F | 1    | [34]     |
|                                                 |                             | Heterobasidion root disease ( <i>Heterobasidion</i> spp.)         | D   | 1    | [36]     |
| <i>Thrinax morrisii</i>                         | key thatch palm             | Boisduval Scale ( <i>Diaspis boisduvalii</i> )                    | I/S | 1    | [199]    |
| <i>Thrinax radiata</i>                          | Florida thatch palm         | Boisduval Scale ( <i>Diaspis boisduvalii</i> )                    | I/S | 1    | [199]38  |
| <i>Thuja occidentalis</i>                       | northern white-cedar        | Heterobasidion root disease ( <i>Heterobasidion</i> spp.)         | D   | 1    | [36]     |
|                                                 |                             | Seiridium canker ( <i>Seiridium cardinale</i> )                   | D   | 1    | [36]     |
| <i>Thuja plicata</i>                            | western redcedar            | Heterobasidion root disease ( <i>Heterobasidion</i> spp.)         | D   | 3    | [1]      |
|                                                 |                             | Cercospora blight ( <i>Asperisporium sequoiae</i> )               | D   | 1    | [36,124] |
|                                                 |                             | Didymascella leaf blight ( <i>Didymascella thujina</i> )          | D   | 1    | [36]     |
|                                                 |                             | Heterobasidion root disease ( <i>Heterobasidion</i> spp.)         | D   | 1    | [36]     |
|                                                 |                             | Seiridium canker ( <i>Seiridium cardinale</i> )                   | D   | 1    | [36]     |
| <i>Tilia americana</i>                          | American basswood           | Gypsy moth ( <i>Lymantria dispar dispar</i> )*                    | I/F | 3    | [34]     |
|                                                 |                             | Japanese beetle ( <i>Popillia japonica</i> )*                     | I/F | 1    | [34]     |
|                                                 |                             | Nectria canker ( <i>Nectria ditissima</i> )                       | D   | 1    | [36]     |
| <i>Tilia americana</i> var. <i>caroliniana</i>  | Carolina basswood           | Gypsy moth ( <i>Lymantria dispar dispar</i> )*                    | I/F | 3    | [34]     |
|                                                 |                             | Japanese beetle ( <i>Popillia japonica</i> )*                     | I/F | 1    | [34]     |
|                                                 |                             | Nectria canker ( <i>Nectria ditissima</i> )                       | D   | 1    | [36]     |
| <i>Tilia americana</i> var. <i>heterophylla</i> | white basswood              | Gypsy moth ( <i>Lymantria dispar dispar</i> )*                    | I/F | 3    | [34]     |
|                                                 |                             | Japanese beetle ( <i>Popillia japonica</i> )*                     | I/F | 1    | [34]     |
|                                                 |                             | Nectria canker ( <i>Nectria ditissima</i> )                       | D   | 1    | [36]     |
| <i>Torreya californica</i>                      | California torreya (nutmeg) | none                                                              | .   | .    | .        |

T/G=Taxon/Guild. Taxon: I=insect, D=disease, P=parasitic plant, C=insect and disease multi-agent complex; Guild (for insects): B=phloem- or wood-borers, F=foliage-feeders, S=sap-feeders. Sev.=Severity. Nonnative invasive agents are indicated with \*.

| Host species scientific name | Host species common name | Agent                                                            | T/G | Sev. | Sources  |
|------------------------------|--------------------------|------------------------------------------------------------------|-----|------|----------|
| <i>Torreya taxifolia</i>     | Florida torreyia         | Canker disease ( <i>Fusarium</i> spp.)                           | D   | 10   | [200]    |
| <i>Tsuga canadensis</i>      | eastern hemlock          | Hemlock woolly adelgid ( <i>Adelges tsugae</i> )*                | I/S | 10   | [37]     |
|                              |                          | Elongate hemlock scale ( <i>Fiorinia externa</i> )*              | I/S | 3    | [34]     |
|                              |                          | Hemlock borer ( <i>Melanophila fulvoguttata</i> )                | I/B | 1    | [1]      |
|                              |                          | Hemlock looper ( <i>Lambdina fiscellaria</i> )                   | I/F | 1    | [1,37]   |
|                              |                          | Spruce budworm ( <i>Choristoneura fumiferana</i> )               | I/F | 1    | [1]      |
| <i>Tsuga caroliniana</i>     | Carolina hemlock         | Hemlock woolly adelgid ( <i>Adelges tsugae</i> )*                | I/S | 10   | [37]     |
|                              |                          | Elongate hemlock scale ( <i>Fiorinia externa</i> )*              | I/S | 3    | [34]     |
|                              |                          | Hemlock borer ( <i>Melanophila fulvoguttata</i> )                | I/B | 1    | [201]    |
|                              |                          | Hemlock looper ( <i>Lambdina fiscellaria</i> )                   | I/F | 1    | [202]    |
| <i>Tsuga heterophylla</i>    | western hemlock          | Laminated root rot ( <i>Phellinus sulphurascens</i> )            | D   | 5    | [20,203] |
|                              |                          | Hemlock dwarf mistletoe ( <i>Arceuthobium tsugense</i> )         | P   | 5    | [36]     |
|                              |                          | Heterobasidion root disease ( <i>Heterobasidion</i> spp.)        | D   | 3    | [36]     |
|                              |                          | Schweinitzii root and butt rot ( <i>Phaeolus schweinitzii</i> )  | D   | 3    | [1]      |
|                              |                          | Western hemlock looper ( <i>Lambdina fiscellaria lugubrosa</i> ) | I/F | 3    | [1]      |
| <i>Tsuga mertensiana</i>     | mountain hemlock         | Laminated root rot ( <i>Phellinus sulphurascens</i> )            | D   | 5    | [1,20]   |
|                              |                          | Hemlock dwarf mistletoe ( <i>Arceuthobium tsugense</i> )         | P   | 5    | [1]      |
|                              |                          | Heterobasidion root disease ( <i>Heterobasidion</i> spp.)        | D   | 3    | [1]      |
|                              |                          | Schweinitzii root and butt rot ( <i>Phaeolus schweinitzii</i> )  | D   | 3    | [1]      |
| <i>Ulmus alata</i>           | winged elm               | Dutch elm disease ( <i>Ophiostoma novo-ulmi</i> )*               | D   | 8    | [36]     |
|                              |                          | Elm yellows (Candidatus <i>Phytoplasma ulmi</i> )                | D   | 5    | [36,204] |
|                              |                          | Asian longhorned beetle ( <i>Anoplophora glabripennis</i> )*     | I/B | 3    | [34]     |
| <i>Ulmus americana</i>       | American elm             | Dutch elm disease ( <i>Ophiostoma novo-ulmi</i> )*               | D   | 8    | [36]     |
|                              |                          | Elm yellows (Candidatus <i>Phytoplasma ulmi</i> )                | D   | 5    | [36,204] |
|                              |                          | Asian longhorned beetle ( <i>Anoplophora glabripennis</i> )*     | I/B | 3    | [34]     |

T/G=Taxon/Guild. Taxon: I=insect, D=disease, P=parasitic plant, C=insect and disease multi-agent complex; Guild (for insects): B=phloem- or wood-borers, F=foliage-feeders, S=sap-feeders. Sev.=Severity. Nonnative invasive agents are indicated with \*.



| Host species scientific name      | Host species common name | Agent                                                                                             | T/G | Sev. | Sources  |
|-----------------------------------|--------------------------|---------------------------------------------------------------------------------------------------|-----|------|----------|
| <i>Ulmus crassifolia</i>          | cedar elm                | Banded elm bark beetle ( <i>Scolytus schevyrewi</i> )*                                            | I/B | 3    | [34,35]  |
|                                   |                          | Pit canker ( <i>Phytophthora inflata</i> )                                                        | D   | 1    | [36]     |
|                                   |                          | Dutch elm disease ( <i>Ophiostoma novo-ulmi</i> )*                                                | D   | 8    | [36]     |
|                                   |                          | Elm yellows (Candidatus <i>Phytoplasma ulmi</i> )                                                 | D   | 5    | [36,204] |
| <i>Ulmus rubra</i>                | slippery elm             | Asian longhorned beetle ( <i>Anoplophora glabripennis</i> )*                                      | I/B | 3    | [34]     |
|                                   |                          | Dutch elm disease ( <i>Ophiostoma novo-ulmi</i> )*                                                | D   | 5    | [36]     |
|                                   |                          | Elm yellows (Candidatus <i>Phytoplasma ulmi</i> )                                                 | D   | 5    | [36,204] |
| <i>Ulmus serotina</i>             | September elm            | Asian longhorned beetle ( <i>Anoplophora glabripennis</i> )*                                      | I/B | 3    | [34]     |
|                                   |                          | Dutch elm disease ( <i>Ophiostoma novo-ulmi</i> )*                                                | D   | 8    | [36]     |
|                                   |                          | Elm yellows (Candidatus <i>Phytoplasma ulmi</i> )                                                 | D   | 5    | [36]     |
| <i>Ulmus thomasii</i>             | rock elm                 | Asian longhorned beetle ( <i>Anoplophora glabripennis</i> )*                                      | I/B | 3    | [34]     |
|                                   |                          | Dutch elm disease ( <i>Ophiostoma novo-ulmi</i> )*                                                | D   | 8    | [36]     |
|                                   |                          | Elm yellows (Candidatus <i>Phytoplasma ulmi</i> )                                                 | D   | 5    | [13]     |
|                                   |                          | Asian longhorned beetle ( <i>Anoplophora glabripennis</i> )*                                      | I/B | 3    | [34]     |
| <i>Umbellularia californica</i>   | California-laurel        | Banded elm bark beetle ( <i>Scolytus schevyrewi</i> )*                                            | I/B | 3    | [36]     |
|                                   |                          | Laurel wilt ( <i>Raffaelea lauricola</i> )/redbay ambrosia beetle ( <i>Xyleborus glabratus</i> )* | C   | 8    | [205]    |
|                                   |                          | Bacterial leaf blight ( <i>Pseudomonas lauraceum</i> )                                            | D   | 1    | [36]     |
|                                   |                          | Sudden oak death ( <i>Phytophthora ramorum</i> )*                                                 | D   | 1    | [36]     |
|                                   |                          | White mottled rot ( <i>Ganoderma</i> spp.)                                                        | D   | 1    | [36]     |
| <i>Washingtonia filifera</i>      | California fan palm      | Giant palm borer ( <i>Dinapate wrightii</i> )                                                     | I/B | 3    | [7]      |
|                                   |                          | False smut of palms ( <i>Graphiloa phoenicis</i> )                                                | D   | 1    | [36]     |
| <i>Yucca brevifolia</i>           | Joshua tree              | Wood rotting ( <i>Phanerochaete tuberculata</i> )                                                 | D   | 1    | [206]    |
| <i>Yucca treculeana</i>           | Trecul yucca             | none                                                                                              | .   | .    | .        |
| <i>Zanthoxylum clava-herculis</i> | Hercules-club            | none                                                                                              | .   | .    | .        |
| <i>Zanthoxylum fagara</i>         | lime prickly-ash         | none                                                                                              | .   | .    | .        |

T/G=Taxon/Guild. Taxon: I=insect, D=disease, P=parasitic plant, C=insect and disease multi-agent complex; Guild (for insects): B=phloem- or wood-borers, F=foliage-feeders, S=sap-feeders. Sev.=Severity. Nonnative invasive agents are indicated with \*.

## References

1. *Silvics of North America*. Burns, R.M.; Honkala, B.H., Eds.; United States Department of Agriculture, Forest Service: Washington, D.C., 1990; p 877.
2. Wilken, D. Plant Guide: Pacific Silver Fir. Available online: [https://plants.usda.gov/plantguide/pdf/pg\\_abam.pdf](https://plants.usda.gov/plantguide/pdf/pg_abam.pdf) (accessed on February 26, 2019).
3. Ragenovich, I.R.; Mitchell, R.G. *Balsam Woolly Adelgid*; Forest Insect & Disease Leaflet 118; U.S. Department of Agriculture, Forest Service: Washington, D.C., 2006; p 11.
4. Thies, W.G.; Sturrock, R.N. *Laminated root rot in western North America*; Gen. Tech. Rep. PNW-GTR-349; United States Department of Agriculture, Forest Service, Pacific Northwest Research Station: Portland, Oregon, 1995; p 32.
5. Global Invasive Species Database. *Adelges piceae*. Available online: <http://www.iucngisd.org/gisd/species.php?sc=226> (accessed on March 1, 2019).
6. Hansen, E.M.; Lewis, K.J.; American Phytopathological Society. *Compendium of conifer diseases*; APS Press, the American Phytopathological Society: St. Paul, MN, 1997; pp. 101.
7. United States Department of Agriculture Forest Service. Fire Effects Information System (FEIS). Available online: <https://www.feis-crs.org/feis/> (accessed on February 26, 2019).
8. Popp, J.B.; Lundquist, J.E. *Pathology collection of the Rocky Mountain Research Station*; RMRS GTR-167WWW; United States Department of Agriculture, Forest Service, Rocky Mountain Research Station: Fort Collins, Colorado, 2006; p 183.
9. Scharpf, R.F.; Staley, J.; Hawksworth, F.G. A needle cast, the first known disease of Bristlecone Fir in California. *Plant Dis. Rep.* **1970**, *54*, 275-277.
10. Scharpf, R.F. *Diseases of Pacific Coast Conifers*; Agriculture Handbook 521; United States Department of Agriculture, Forest Service, Pacific Southwest Research Station: Albany, California, 1993; p 199.
11. Furniss, R.L.; Carolin, V.M.; United States. Forest Service. *Western Forest Insects*; Miscellaneous Publication 1339; United States Department of Agriculture, Forest Service: Washington D.C., 1977; p 654.
12. United States Department of Agriculture Forest Service. *Field Guide to Diseases and Insects of the Rocky Mountain Region*; Gen. Tech. Report RMRS-GTR-241; United States Department of Agriculture, Forest Service, Rocky Mountain Research Station: Fort Collins, Colorado, 2010; p 336.
13. Horst, R.K. *Westcott's Plant Disease Handbook*, Eighth edition ed.; SpringerReference: Dordrecht, Netherlands, 2013; pp. 826 pages.
14. United States Department of Agriculture Natural Resources Conservation Service. Plant Fact Sheet: White Fir. Available online: [https://plants.usda.gov/factsheet/pdf/fs\\_abco.pdf](https://plants.usda.gov/factsheet/pdf/fs_abco.pdf) (accessed on March 1, 2019).
15. Wickman, B.E.; Mason, R.R.; Trostle, G.C. *Douglas-Fir Tussock Moth*; Forest Insect & Disease Leaflet 86; United States Department of Agriculture, Forest Service: Washington, D.C., 1981; p 10.
16. Otrosina, W.J.; Scharpf, R.F. *Proceedings of the Symposium on Research and Management of Annosus Root Disease (Heterobasidion annosum) in Western North America*; Gen. Tech. Rep. PSW-GTR-116; United States Department of Agriculture, Forest Service, Pacific Southwest Forest and Range Experiment Station: Berkeley, California, 1989; p 177.
17. Talgo, V.; Chastagner, G. *Phytophthora on Abies*; JKI Data Sheets – Plant Diseases and Diagnosis 77; Julius Kühn-Institut, Federal Research Centre for Cultivated Plants: Quedlinburg, Germany, 2013; p 11.
18. Hagle, S.K. Management Guide for Armillaria Root Disease In *Forest Insect and Disease Management Guide for the Northern and Central Rocky Mountains*, United States Department of Agriculture, Forest Service, Northern and Intermountain Regions, State and Private Forestry: Missoula, Montana, and Boise, Idaho, 2008; p. 23.
19. Ferrell, G.T. *Fir Engraver*; Forest Insect & Disease Leaflet 13; United States Department of Agriculture, Forest Service: Washington, D.C., 1986; p 8.
20. Hagle, S.K. Management Guide for Laminated Root Rot. In *Forest Insect and Disease Management Guide for the Northern and Central Rocky Mountains*, United States Department of Agriculture, Forest Service, Northern and Intermountain Regions, State and Private Forestry: Missoula, Montana, and Boise, Idaho, 2009; p. 20.

21. Gonthier, P.; Nicolotti, G. *Infectious Forest Diseases*; CAB International: Wallingford, Oxfordshire, United Kingdom, 2013.
22. Nesom, G. Plant Guide: Subalpine Fir. Available online: [https://plants.usda.gov/plantguide/pdf/pg\\_abla.pdf](https://plants.usda.gov/plantguide/pdf/pg_abla.pdf) (accessed on February 27, 2019).
23. Spiegel, L.H.; Chadwick, K.; Mehmel, C. Assessment of balsam woolly adelgid damage to eastern Washington and Oregon subalpine fir (Project WC-F-07-01). In *Forest Health Monitoring: National Status, Trends, and Analysis 2010*, Potter, K.M., Conkling, B.L., Eds. United States Department of Agriculture Forest Service, Southern Research Station: Asheville, North Carolina, 2013; Vol. Gen. Tech. Rep. SRS-GTR-176, pp. 129-134.
24. Kegley, S. Management Guide for Western Balsam Bark Beetle. In *Forest Insect and Disease Management Guide for the Northern and Central Rocky Mountains*, United States Department of Agriculture, Forest Service, Northern and Intermountain Regions, State and Private Forestry: Missoula, Montana, and Boise, Idaho, 2006; p. 4.
25. Fellin, D.G.; Dewey, J.E. *Western Spruce Budworm*; Forest Insect & Disease Leaflet 53; United States Department of Agriculture, Forest Service: Washington, D.C., 1982; p 10.
26. Fairweather, M.L.; Rogers, J.M.T.; Conklin, D.; Fitzgibbon, B. *Field Guide to Insects and Diseases of Arizona and New Mexico Forests*; MR-R3-16-3; United States Department of Agriculture Forest Service, Southwestern Region: Albuquerque, New Mexico, 2006; p 271.
27. Randall, C.B. Management Guide for Fir Engraver In *Forest Insect and Disease Management Guide for the Northern and Central Rocky Mountains*, United States Department of Agriculture, Forest Service, Northern and Intermountain Regions, State and Private Forestry: Missoula, Montana, and Boise, Idaho, 2006; p. 7.
28. Filip, G.M.; Goheen, D.J.; Kimmey, J.W. *Rust-red stringy rot caused by the Indian Paint Fungus*; Forest Insect & Disease Leaflet 93; United States Department of Agriculture, Forest Service, Pacific Northwest Region: Portland, Oregon, 2009; p 11.
29. Goheen, E.M.; Willhite, E.A. *Field Guide to Common Diseases and Insect Pests of Oregon and Washington Conifers*; R6-NR-FID-PR-01-06; United States Forest Service, Pacific Northwest Region: Portland, Oregon, 2006; p 327.
30. Filip, G.M.; Beatty, J.S.; Mathiasen, R.L. Fir dwarf mistletoe. In *Forest Insect & Disease Leaflet 89*, United States Department of Agriculture, Forest Service: Washington, D.C., 2000.
31. Filip, G.M.; Schmitt, C.L. *Rx for Abies: Silvicultural Options for Diseased Firs in Oregon and Washington*; Gen. Tech. Rep. PNW-252; United States Department of Agriculture, Forest Service, Pacific Northwest Research Station: Portland, Oregon, 1990.
32. Parrotta, J.A. *Acacia farnesiana (L.) Willd., Aroma, huisache : Leguminosae (Mimosoideae), legume family*; SO-ITF-SM-49; U.S. Forest Service, Southern Forest Experiment Station, Institute of Tropical Forestry: Rio Piedras, Puerto Rico, 1992; p 5.
33. Francis, J.K. *Wildland Shrubs of the United States and its Territories: Thamnic Descriptions: Volume 1*; Gen. Tech. Rep. IITF-GTR-26; United States Department of Agriculture, Forest Service, Rocky Mountain Research Station: Rio Piedras, Puerto Rico, 2004; p 830.
34. United States Department of Agriculture Forest Service. Alien Forest Pests and Their Hosts Available online: [http://www.nrs.fs.fed.us/tools/afpe/data/tree\\_list/](http://www.nrs.fs.fed.us/tools/afpe/data/tree_list/) (accessed on February 25, 2019).
35. Center for Invasive Species and Ecosystem Health. Forest Pests of North America. Available online: [https://www.forestpests.org/host\\_trees.html](https://www.forestpests.org/host_trees.html) (accessed on February 25, 2019).
36. Sinclair, W.A.; Lyon, H.H. *Diseases of trees and shrubs*, 2nd ed.; Comstock Pub. Associates/Cornell University Press: Ithaca, N.Y., 2005; pp. xiii, 660 p.
37. Ciesla, W.M. *Forest entomology : a global perspective*; Wiley-Blackwell: Chichester, West Sussex ; Hoboken, NJ, 2011; pp. viii, 400 p., [440] p. of col. plates.
38. Eskalen, A.; Stouthamer, R.; Lynch, S.C.; Rugman-Jones, P.F.; Twizeyimana, M.; Gonzalez, A.; Thibault, T. Host Range of *Fusarium Dieback* and Its *Ambrosia Beetle* (Coleoptera: Scolytinae) Vector in Southern California. *Plant Dis.* **2013**, *97*, 938-951, doi: <https://doi.org/10.1094/PDIS-11-12-1026-RE>.

39. Garbelotto, M.; Davidson, J.M.; Ivors, K.; Maloney, P.E.; Hüberli, D.; Koike, S.T.; Rizzo, D.M. Non-oak native plants are main hosts for sudden oak death pathogen in California. *Calif. Agr.* **2003**, *57*, 18-23, doi: <https://doi.org/10.3733/ca.v057n01p18>.
40. Eatough Jones, M.; Paine, T.D. Potential pesticides for control of a recently introduced ambrosia beetle (*Eurwallacea* sp.) in southern California. *J. Pest Sci.* **2018**, *91*, 237-246, doi: <https://doi.org/10.1007/s10340-017-0866-8>.
41. Kessler, K.J.; Hadfield, J.S. *Eutypella Canker of Maple*; Forest Pest Leaflet 136; United States Department of Agriculture, Forest Service: Washington, D.C., 1972; p 6.
42. Pijut, P.M. *Diseases in Hardwood Tree Plantings*; FNR-221; Hardwood Tree Improvement and Regeneration Center, Purdue University and United States Department of Agriculture Forest Service, Northern Research Station: West Lafayette, Indiana, 2006; p 16.
43. Dickerson, J. Plant Fact Sheet: Red Maple. Available online: [https://plants.usda.gov/factsheet/pdf/fs\\_acru.pdf](https://plants.usda.gov/factsheet/pdf/fs_acru.pdf) (accessed on March 1, 2019).
44. Gould, A.B.; Lashomb, J.H. Bacterial leaf scorch (BLS) of shade trees. *The Plant Instructor* **2007**, 10.1094/PHI-I-2007-0403-07, doi: 10.1094/PHI-I-2007-0403-07.
45. Heimann, M.F.; Worf, G.L. *Maple and Other Trees Disorder: Verticillium Wilt*; A2537; University of Wisconsin-Extension, Cooperative Extension: Madison, Wisconsin, 1997; p 2.
46. United States Department of Agriculture Animal and Plant Health Inspection Service. *Japanese Beetle (Popillia japonica Newman)*; Program Aid No. 1881; United States Department of Agriculture, Animal and Plant Health Inspection Service: 2007; p 2.
47. Berlanger, I.; Powelson, M.L. Verticillium wilt. *The Plant Health Instructor* **2005**.
48. Broschat, T.K. *Acoelorrhaphe wrightii: Paurotis Palm*; ENH-217; University of Florida, Institute of Food and Agricultural Sciences Extension: Gainesville, Florida, 2014; p 3.
49. Inserra, R.N.; Dunn, R.A.; Vovlas, N. Host Response of Ornamental Palms to *Rotylenchulus reniformis*. *J. Nematol.* **1994**, *26*, 737-743.
50. Purcell, A.H.; Saunders, S.R. Fate of Pierce's Disease Strains of *Xylella fastidiosa* in Common Riparian Plants in California. *Plant Dis.* **1999**, *83*, 825-830, doi: <https://doi.org/10.1094/PDIS.1999.83.9.825>.
51. Rizzo, D.M.; Garbelotto, M.; Davidson, J.M.; Slaughter, G.M.; Koike, S.T. *Phytophthora ramorum* and sudden oak death in California: I. Host relationships. In *Proceedings of the Fifth Symposium on Oak Woodlands: Oaks in California's Challenging Landscape*, Standiford, R.B., Ed. United States Department of Agriculture, Forest Service, Pacific Southwest Research Station: Albany, California, 2002; Vol. Gen. Tech. Rep. PSW-GTR-184, pp. 733-740.
52. Santamour, F.S.J.; Riedel, L.G.H. Susceptibility of various landscape trees to root-knot nematodes. *Journal of Arboriculture* **1993**, *19*, 257-259.
53. DePamphilis, C.W.; Neufeld, H.S. Phenology and ecophysiology of *Aesculus sylvatica*, a vernal understory tree. *Botany* **1989**, *67*, 2161-2167, doi: <https://doi.org/10.1139/b89-274>.
54. Sims, L.; Goheen, E.; Kanaskie, A.; Hansen, E. Alder Canopy Dieback and Damage in Western Oregon Riparian Ecosystems. *Northwest Sci.* **2015**, *89*, 34-46, doi: <https://doi.org/10.3955/046.089.0103>.
55. Worrall, J.J.; Adams, G.C.; Tharp, S.C. Summer heat and an epidemic of cytospora canker of *Alnus*. *Can. J. Plant Pathol.* **2010**, *32*, 376-386, doi: <https://doi.org/10.1080/07060661.2010.499265>.
56. Kruse, J.J.; Zogas, K.; Hard, J.; Lisuzzo, N. *Pest Alert New Pest in Alaska and Washington: The Green Alder Sawfly - *Monsoma pulveratum* (Retzius)*; R10-PR-022; United States Department of Agriculture, Forest Service, State and Private Forestry: Anchorage, Alaska, 2010; p 2.
57. United States Department of Agriculture Forest Service. *Forest Health Conditions in Alaska 2010: A Forest Health Protection Report*; Forest Protection Report R10-PR-23; United States Department of Agriculture, Forest Service, Alaska Region: Anchorage, Alaska, 2010; p 78.
58. United States Department of Agriculture Forest Service. *Forest Health Conditions in Alaska 2017: A Forest Health Protection Report*; Forest Protection Report R10-PR-43; United States Department of Agriculture, Forest Service, Alaska Region: Anchorage, Alaska, 2018; p 64.
59. Batzer, H.O.; Morris, R.C. *Forest Tent Caterpillar*; Forest Insect & Disease Leaflet 9; United States Department of Agriculture, Forest Service: Washington, D.C., 1978; p 8.

60. Nesom, G. Plant Guide: Downy Serviceberry. Available online: [https://plants.usda.gov/plantguide/pdf/pg\\_amar3.pdf](https://plants.usda.gov/plantguide/pdf/pg_amar3.pdf) (accessed on February 27, 2019).
61. Gilman, E.F.; Watson, D.G. *Amelanchier arborea: Downy Serviceberry*; ENH-232; University of Florida, Institute of Food and Agricultural Sciences Extension: Gainesville, Florida, 2006; p 3.
62. Moorman, G.W. Amelanchier Diseases. Available online: <https://extension.psu.edu/amelanchier-diseases> (accessed on March 1, 2019).
63. Niemiec, S.S.; Ahrens, G.R.; Willits, S.; Hibbs, D.E. *Hardwoods of the Pacific Northwest*; Research Contribution 8; Oregon State University, College of Forestry, Forest Research Laboratory: Corvallis, Oregon, 1995; p 115.
64. Bennett, M.; Shaw, D. *Diseases and Insect Pests of Pacific Madrone*; EC 1619-E; Oregon State University, Extension Service: Corvallis, Oregon, 2008; p 5.
65. Immel, D.L. Plant Guide: Pacific Madrone. Available online: [https://plants.usda.gov/plantguide/pdf/cs\\_arne.pdf](https://plants.usda.gov/plantguide/pdf/cs_arne.pdf) (accessed on March 1, 2019).
66. Elliott, M.; Edmonds, R.L. Systematic Study of *Natrassia mangiferae*, the Cause of Madrone Canker In *Proceedings of the 51st Western International Forest Disease Work Conference*, Geils, B.W., Ed. United States Department of Agriculture, Forest Service, Rocky Mountain Research Station: Flagstaff, Arizona, 2003; pp. 59-62.
67. Layne, D.R. The Pawpaw [*Asimina triloba* (L.) Dunal]: A New Fruit Crop for Kentucky and the United States. *HortScience* **1996**, *31*, 777-784.
68. Gilbert, G.S.; Sousa, W.P. Host Specialization among Wood-Decay Polypore Fungi in a Caribbean Mangrove Forest. *Biotropica* **2002**, *34*, 396-404.
69. Muilenburg, V.L.; Herms, D.A. A Review of Bronze Birch Borer (Coleoptera: Buprestidae) Life History, Ecology, and Management. *Environ. Entomol.* **2012**, *41*, 1372-1385, doi: <https://doi.org/10.1603/en12238>.
70. Katovich, S.A.; Munson, A.S.B., J.; McCullough, D. *Bronze Birch Borer*; Forest Insect & Disease Leaflet 111; United States Department of Agriculture, Forest Service: Washington, D.C., 2000; p 8.
71. McCormick, M.A.; Cubeta, M.A.; Grand, L.F. Geography and hosts of the wood decay fungi *Fomes fasciatus* and *Fomes fomentarius* in the United States. *North American Fungi* **2013**, *8*, 1-53, doi: <http://dx.doi.org/10.2509/naf2013.008.002>.
72. Wennerberg, S. Plant Guide: Gray Birch. Available online: [https://plants.usda.gov/plantguide/pdf/pg\\_bepo.pdf](https://plants.usda.gov/plantguide/pdf/pg_bepo.pdf) (accessed on February 27, 2019).
73. Santamour, F.S.J. Differential feeding by adult Japanese beetles on foliage of birch (*Betula*) species and hybrids. *Journal of Arboriculture* **2001**, *27*, 18-23.
74. Caldwell, D.L.; Palmateer, A.J. Gumbo-Limbo Trees Struggle With Three New Dieback Plagues: Puzzling Witches'-broom Symptoms, Croton Scale, and Rugose Spiraling Whitefly. *Proc. Fl. State Hort.* **2014**, *127*, 158-159.
75. Smith, T.F.; Rizzo, D.M.; North, M. Patterns of mortality in an old-growth mixed-conifer forest of the southern Sierra Nevada, California. *For. Sci.* **2005**, *51*, 266-275.
76. Hoover, G.A. *Entomological Notes: Juniper Scale*; EV-7; The Pennsylvania State University, College of Agricultural Sciences, Cooperative Extension: University Park, Pennsylvania, 2002; p 1.
77. Pierson, E.A.; Turner, R.M. An 85-Year Study of Saguaro (*Carnegiea gigantea*) Demography. *Ecology* **1998**, *79*, 2676-2693, doi: <https://doi.org/10.2307/176509>.
78. Kelly, J.; Olsen, M.W. *Problems and Pests of Agave, Aloe, Cactus and Yucca*; AZ 1399; The University of Arizona, Cooperative Extension: Tucson, Arizona, 2011; p 9.
79. Davidson, C.B.; Gottschalk, K.W.; Johnson, J.E. Tree Mortality Following Defoliation by the European Gypsy Moth (*Lymantria dispar* L.) in the United States: A Review. *Forest Sci.* **1999**, *45*, 74-84.
80. Grand, L.; Vernia, C. New taxa and hosts of poroid wood-decay fungi in North Carolina. *Castanea* **2002**, *67*, 193-200.
81. Grand, L.F.; Vernia, C.S. Biogeography and hosts of poroid wood decay fungi in North Carolina: species of *Fomes*, *Fomitopsis*, *Fomitella* and *Ganoderma*. *Mycotaxon* **2005**, *94*, 231-234.
82. McCracken, F.I. *Canker-rots in Southern Hardwoods*; Forest Insect & Disease Leaflet 33; United States Department of Agriculture, Forest Service: Washington, D.C., 1978; p 4.
83. Forcella, F. Why twig-girdling beetles girdle twigs. *Naturwissenschaften* **1982**, *69*, 398-400, doi: 10.1007/bf00396699.



84. Anagnostakis, S.L. The Effect of Multiple Importations of Pests and Pathogens on a Native Tree. *Biol. Invasions* **2001**, 3, 245-254, doi: 10.1023/a:1015205005751.
85. Case, A.E.; Mayfield, I.I.A.E.; Clark, S.L.; Schlarbaum, S.E.; Reynolds, B.C. Abundance and Frequency of the Asiatic Oak Weevil (Coleoptera: Curculionidae) and Defoliation on American, Chinese, and Hybrid Chestnut (*Castanea*). *J. Insect Sci.* **2016**, 16, 29-29, doi: 10.1093/jisesa/iew012.
86. Payne, J.A.; Miller, G.; Johnson, G.P.; Senter, S.D. *Castanea pumila* (L.) Mill.: An Underused Native Nut Tree. *HortScience* **1994**, 29, 62-131.
87. Geyer, W.A.; Broyles, P.J.; Row, J.M. Plant Guide: Southern Catalpa. Available online: [https://plants.usda.gov/plantguide/pdf/pg\\_cabi8.pdf](https://plants.usda.gov/plantguide/pdf/pg_cabi8.pdf) (accessed on February 27, 2019).
88. Geyer, W.A.; Broyles, P.J. Plant Guide: Northern Catalpa. Available online: [https://plants.usda.gov/plantguide/pdf/pg\\_casp8.pdf](https://plants.usda.gov/plantguide/pdf/pg_casp8.pdf) (accessed on February 29, 2019).
89. Furniss, M.M.; Ferguson, D.C.; Voget, K.W.; Burkhardt, J.W.; Tiedemann, A.R.; Oldemeyer, J.L. *Taxonomy, life history, and ecology of a mountain-mahogany defoliator, Stamnodes animata (Pearsall), in Nevada*; Fish and Wildlife Research 3; U.S. Dept. of the Interior, Fish and Wildlife Service: Washington, D.C., 1988; pp ix, 26 pages.
90. Betlejewski, F.; Goheen, D.J.; Angwin, P.A.; Snieszko, R.A. *Port-Orford-Cedar Root Disease*; Forest Insect & Disease Leaflet 131; United Department of Agriculture, Forest Service, Pacific Northwest Region: Portland, OR, 2011; p 12.
91. Thiemann, D.; Lopez, V.; Ray, A.M.; Cipollini, D. The History of Attack and Success of Emerald Ash Borer (Coleoptera: Buprestidae) on White Fringetree in Southwestern Ohio. *Environ. Entomol.* **2016**, 45, 961-966, doi: <https://doi.org/10.1093/ee/nvw073>.
92. Cipollini, D. White Fringetree as a Novel Larval Host for Emerald Ash Borer. *J. Econ. Entomol.* **2015**, 108, 370-375, doi: <https://doi.org/10.1093/jee/tou026>.
93. Saavedra, A.; Hansen, E.M.; Goheen, D.J. *Phytophthora cambivora* in Oregon and its pathogenicity to *Chrysolepis chrysophylla*. *Forest Pathol.* **2007**, 37, 409-419, doi: <https://doi.org/10.1111/j.1439-0329.2007.00515.x>.
94. Hamon, A.; Fasulo, T.R.; Buss, L.J. *Cardin's Whitefly, Metaleurodicus cardini (Back) (Insecta: Hemiptera: Aleyrodidae: Aleyrodicinae)*; EENY-15; University of Florida, Institute of Food and Agricultural Sciences Extension Service: Gainesville, Florida, 2014; p 4.
95. Kern, W.H. *Fiddlewood Leafroller, Seagrape Moth (suggested common names) Epicorsia oedipodalis (Guenée, 1854) (Lepidoptera: Ditrysia: Pyraloidea: Pyralidae: Pyraustinae)*; ENH-617; University of Florida, Institute of Food and Agricultural Sciences Extension: Gainesville, Florida, 2015; p 4.
96. Gilman, E.F.; Watson, D.G. *Cladrastis kentukea: American Yellowwood*; ENH329; University of Florida, Institute of Food and Agricultural Sciences Extension: Gainesville, Florida, 2014; p 3.
97. Howard, F.W.; Pemberton, R.; Hamon, A.; Hodges, G.S.; Steinberg, B.; Mannion, C.M.; McLean, D.; Wofford, J. *Lobate Lac Scale, Paratachardina lobata lobata (Chamberlin) (Hemiptera: Sternorrhyncha: Coccoidea: Kerriidae)*; EENY-276; University of Florida, Institute of Food and Agricultural Sciences Extension: Gainesville, Florida, 2017; p 14.
98. Schoch, C.L.; Crous, P.W.; Witthuhn, R.C.; Cronwright, G.; El-Gholl, N.E.; Wingfield, B.D. Recombination in *Calonectria morganii* and Phylogeny with Other Heterothallic Small-Spored *Calonectria* Species. *Mycologia* **2000**, 92, 665-673, doi: <https://doi.org/10.2307/3761424>.
99. Neal, A. *Sri Lankan Weevil Myllocerus undecimpustulatus undatus Marshall*; EENY579; University of Florida, Institute of Food and Agricultural Sciences Extension: Gainesville, Florida, 2013; p 4.
100. Gilman, E.F.; Watson, D.G. *Cordia sebestena: Geiger Tree*; ENH-341; University of Florida, Institute of Food and Agricultural Sciences Extension: Gainesville, Florida, 1993; p 2.
101. Linsky, J.; Manco, B.N. *Cordia sebestena* var. *sebestena*. The IUCN Red List of Threatened Species. Version 2018-2. Available online: <http://dx.doi.org/10.2305/IUCN.UK.2014-1.RLTS.T56497523A56504011.en> (accessed on March 2, 2019).
102. Palmateer, A.J.; Pérez, J.M.; Cating, R.A.; Ploetz, R.C.; Hoy, M.A. First Report of Tar Spot on Orange Geiger, *Cordia sebestena*, Caused by *Diatractium cordianum* in Florida. *Plant Dis.* **2008**, 92, 1250-1250, doi: <https://doi.org/10.1094/PDIS-92-8-1250B>.

103. Gyeltshen, J.; Hodges, A. *Dogwood Borer, Synanthedon scitula (Harris) (Insecta: Lepidoptera: Sesiidae)*; EENY-374; University of Florida, Institute of Food and Agricultural Sciences Extension: Gainesville, Florida, February 2, 2016, 2006; p 3.
104. Gilman, E.F.; Watson, D.G. *Cotinus obovatus: American Smoketree*; ENH-367; University of Florida, Institute of Food and Agricultural Sciences Extension: Gainesville, Florida, 2006; p 3.
105. Carroll, J.; Rosa, L.D. Cherry Bark Tortrix Moth. Available online: <https://nysipm.cornell.edu/agriculture/fruits/invasive-species-exotic-pests/> (accessed on February 26, 2019).
106. Lorenzo, A.B. Plant Guide: Brainerd's Hawthorn. Available online: [https://plants.usda.gov/plantguide/pdf/pg\\_crbr3.pdf](https://plants.usda.gov/plantguide/pdf/pg_crbr3.pdf) (accessed on February 27, 2019).
107. Lorenzo, A.B. Plant Guide: Pear Hawthorn. Available online: [https://plants.usda.gov/plantguide/pdf/pg\\_crca.pdf](https://plants.usda.gov/plantguide/pdf/pg_crca.pdf) (accessed on February 27, 2019).
108. Tobin, P.C.; Bai, B.B.; Eggen, D.A.; Leonard, D.S. The ecology, geopolitics, and economics of managing *Lymantria dispar* in the United States. *Int. J. Pest Manage.* **2012**, *58*, 195-210, doi: <https://doi.org/10.1080/09670874.2011.647836>.
109. Lorenzo, A.B. Plant Guide: Cockspur Hawthorn. Available online: [https://plants.usda.gov/plantguide/pdf/pg\\_crcl2.pdf](https://plants.usda.gov/plantguide/pdf/pg_crcl2.pdf) (accessed on February 28, 2019).
110. Lorenzo, A.B. Plant Guide: Fireberry Hawthorn. Available online: [https://plants.usda.gov/plantguide/pdf/pg\\_crch.pdf](https://plants.usda.gov/plantguide/pdf/pg_crch.pdf) (accessed on February 27, 2019).
111. Lorenzo, A.B. Plant Guide: Fanleaf Hawthorn. Available online: [https://plants.usda.gov/plantguide/pdf/pg\\_crfl.pdf](https://plants.usda.gov/plantguide/pdf/pg_crfl.pdf) (accessed on February 27, 2019).
112. Cale, J.A.; McNulty, S.A. Not dead yet: Beech trees can survive nearly three decades in the aftermath phase of a deadly forest disease complex. *For. Ecol. Manage.* **2018**, *409*, 372-377, doi: <https://doi.org/10.1016/j.foreco.2017.11.044>.
113. Cale, J.A.; Garrison-Johnston, M.T.; Teale, S.A.; Castello, J.D. Beech bark disease in North America: Over a century of research revisited. *For. Ecol. Manage.* **2017**, *394*, 86-103, doi: <https://doi.org/10.1016/j.foreco.2017.03.031>.
114. Hodges, G.S.; Hodgson, C.J. *Phalacrocooccus howertoni*, a new genus and species of soft scale (Hemiptera: Coccidae) from Florida. *Fla. Entomol.* **2010**, *93*, 8-23, doi: <https://doi.org/10.1653/024.093.0102>.
115. Habeck, D.H.; Mead, F.W. *Edwards Wasp Moth, Lymire edwardsii (Grote) (Insecta: Lepidoptera: Arctiidae: Ctenuchinae)*; EENY-182; University of Florida, Institute of Food and Agricultural Sciences Extension: Gainesville, Florida, 2017.
116. Legaspi, J.C.; Mannion, C.; Amalin, D.; Jr., B.C.L. Biology, ecology and control of the Ficus whitefly, *Singhiella simplex* (Hemiptera: Aleyrodidae). In *Potential Invasive Pests of Agricultural Crops*, Pena, J.E., Ed. CABI: Wallingford, Oxfordshire, United Kingdom, and Boston, Massachusetts, 2013; pp. 363-372.
117. Henricot, B.; Prior, C. *Phytophthora ramorum*, the cause of sudden oak death or ramorum leaf blight and dieback. *Mycologist* **2004**, *18*, 151-156, doi: <https://doi.org/10.1017/S0269915X04004148>.
118. Tanis, S.R.; McCullough, D.G. Host Resistance of Five Fraxinus Species to *Agrilus planipennis* (Coleoptera: Buprestidae) and Effects of Pacllobutrazol and Fertilization. *Environ. Entomol.* **2015**, *44*, 287-299, doi: <https://doi.org/10.1093/ee/nvu005>.
119. Garden, M.B. Ash Yellows and Decline. Available online: <http://www.missouribotanicalgarden.org/gardens-gardening/your-garden/help-for-the-home-gardener/advice-tips-resources/pests-and-problems/diseases/viruses/ash-yellows.aspx> (accessed on March 2, 2019).
120. University of Illinois Extension. White Ash: *Fraxinus americana*. Available online: <http://extension.illinois.edu/hortanswers/plantdetail.cfm?PlantID=209&PlantTypeID=7> (accessed on March 2, 2019).
121. University of Illinois Extension. Fungal Disease: Verticillium Wilt [Shrubs and Trees]: *Verticillium albo-atrum* and *V. dahliae*. Available online: <http://extension.illinois.edu/hortanswers/detailProblem.cfm?PathogenID=26> (accessed on March 2, 2019).
122. Gilman, E.F.; Watson, D.G. *Fraxinus pennsylvanica: Green Ash*; ENH-425; University of Florida, Institute of Food and Agricultural Sciences Extension: Gainesville, Florida, 2006; p 3.

123. Griffiths, H.M.; Sinclair, W.A.; Smart, C.D.; Davis, R.E. The phytoplasma associated with ash yellows and lilac witches'-broom: '*Candidatus Phytoplasma fraxini*'. *Int. J. Syst. Evol. Micr.* **1999**, *49*, 1605-1614, doi: <https://doi.org/10.1099/00207713-49-4-1605>.
124. Sutton, B.C.; Hodges, C.S. Revision of *Cercospora*-like fungi on *Juniperus* and related conifers. *Mycologia* **1990**, *82*, 313-325, doi: <https://doi.org/10.2307/3759902>.
125. Leahy, R.M. *Cercosporidium Blight of Leyland Cypress and Related Conifers*; Plant Pathology Circular No. 397; Florida Department of Agriculture and Consumer Services, Division of Plant Industry: Gainesville, Florida, 2000; p 4.
126. Geils, B.W.; Moody, B.H.; Tovar, J.C. *Mistletoes of North American Conifers*; United States Department of Agriculture, Forest Service, Rocky Mountain Research Station: Ogden, Utah, 2002; p 123.
127. Hodges, G.S.; Ruter, J.M.; Braman, S.K. Susceptibility of *Ilex* Species, Hybrids and Cultivars to Florida Wax Scale (*Ceroplastes floridensis* Comstock). *J. Environ. Hort.* **2001**, *19*, 32-36.
128. Conrad, A.O.; Taylor, N.J.; Bonello, P.E. *Thousand Cankers Disease*; PLPATH-TREE-07; The Ohio State University, Ohio State University Extension: Columbus, Ohio, 2016.
129. Seybold, S.; Haugen, D.; O'Brien, J.; Graves, A. *Pest Alert: Thousand Cankers Disease*; NA-PR-02-10; United States Department of Agriculture, Forest Service, Northeastern Area State and Private Forestry: Newtown Square, Pennsylvania, 2013; p 2.
130. United States Department of Agriculture Forest Service; United States Department of Agriculture Plant Protection and Quarantine. Thousand Cankers Disease Survey Guidelines for 2018. Available online: [https://www.aphis.usda.gov/plant\\_health/plant\\_pest\\_info/tcd/downloads/TCD\\_Survey\\_Guidelines.pdf](https://www.aphis.usda.gov/plant_health/plant_pest_info/tcd/downloads/TCD_Survey_Guidelines.pdf) (accessed on March 2, 2019).
131. Linit, M. Insects Pests Of Black Walnut. In *Nut Production Handbook for Eastern Black Walnut*, Jones, J.E., Mueller, R., Van Sambeek, J.W., Eds. Southwest Missouri Resources, Conservation & Development (RC&D), Inc.: St. Paul, Minnesota, 1998; pp. 120-123.
132. Moffis, B.L.; Arthurs, S.P. *Bagworm, Thyridopteryx ephemeraeformis* Haworth (Insecta: Lepidoptera: Psychidae); EENY-548; University of Florida, Institute of Food and Agricultural Sciences Extension: Gainesville, FL, 2016.
133. Missouri Botanical Garden. *Juniperus ashei*. Available online: <http://www.missouribotanicalgarden.org/PlantFinder/PlantFinderDetails.aspx?taxonid=279618&isprofile=0&> (accessed on March 2, 2019).
134. DeGomez, T.; Hayes, C.J.; Anhold, J.A.; McMillin, J.D.; Clancy, K.M. Evaluation of insecticides for protecting Arizona cypress (*Cupressus arizonica*) and one-seed juniper (*Juniperus monosperma*) from attack by Phloeosinus bark beetles. *Arboriculture and Urban Forestry* **2007**, *33*, 162-167.
135. Schmitt, C.L.; Parmeter, J.R.; Kliejunas, J.T. *Annosus Root Disease of Western Conifers*; Forest Insect & Disease Leaflet 172; United States Department of Agriculture, Forest Service: Washington, D.C., 2000; p 9.
136. Weber, D.J.; Bunderson, E.D.; Davis, J.N.; Nelson, D.L.; Hreha, A. Diseases and Environmental Factors of the Pinyon-Juniper Communities In *Proceedings: ecology and management of pinyon-juniper communities within the Interior West*, Monsen, S.B., Stevens, R., Eds. United States Department of Agriculture, Forest Service, Rocky Mountain Research Station: Ogden, Utah, 1999; Vol. Proceedings RMRS-P-9, pp. 118-121.
137. Durham, G. Juniper Pocket Rot (*Pyrofomes demidoffii*). Available online: <http://forestry.nv.gov/forestry-resources/forest-health/juniper-pocket-rot/> (accessed on March 2, 2019).
138. Kim, M.-S.; Klopfenstein, N.B.; McDonald, G.I. Effects of Forest Management Practices and Environment on Occurrence of *Armillaria* Species. *Journal of the Korean Forest Society* **2010**, *99*, 251-257.
139. Jetton, R.M. Defoliation tolerance and resistance to the forest tent caterpillar, *Malacosoma disstria* Hbn., in sweetgum, *Liquidambar styraciflua* L. North Carolina State University, Raleigh, NC, 2002.
140. Jetton, R.M.; Robison, D.J. Effects of artificial defoliation on growth and biomass accumulation in short-rotation sweetgum (*Liquidambar styraciflua*) in North Carolina. *J. Insect. Sci.* **2014**, *14*, 107, doi: <https://doi.org/10.1673/031.014.107>.
141. Stocks, I. *The Mexican Lac Scale Tachardiella mexicana* (Comstock) (Hemiptera: Kerriidae); EENY-552; University of Florida, Institute of Food and Agricultural Sciences Extension: Gainesville, Florida, 2016; p 3.



142. *A Compendium of Verticillium Wilts in Tree Species*. Hiemstra, J.A.; Harris, D.C., Eds.; Commission of European Communities: Wageningen, The Netherlands, 1998; p 80.
143. United States Department of Agriculture Natural Resources Conservation Service. Plant Fact Sheet: Southern Crab Apple. Available online: [https://plants.usda.gov/factsheet/pdf/fs\\_maan3.pdf](https://plants.usda.gov/factsheet/pdf/fs_maan3.pdf) (accessed on March 2, 2019).
144. United States Department of Agriculture Natural Resources Conservation Service. Plant Fact Sheet: Swamp Tupelo. Available online: [http://plants.usda.gov/factsheet/pdf/fs\\_nybi.pdf](http://plants.usda.gov/factsheet/pdf/fs_nybi.pdf) (accessed on February 28, 2019).
145. Dixon, W.N.; Woodruff, R.E.; Foltz, J.L. *Black Twig Borer, Xylosandrus compactus (Eichhoff) (Insecta: Coleoptera: Curculionidae: Scolytinae)*; EENY-311; University of Florida, Institute of Food and Agricultural Sciences: Gainesville, Florida, 2005; p 5.
146. Culin, J.D.; Gorsuch, C.S.; Pizzuto, T.M. Natural History and Recommendations for Control of the Rhododendron Stem Borer, *Oberea myops*. *Journal American Rhododendron Society* **1993**, *47*, 206-209.
147. Martin, C.A. *Parkinsonia florida* (formerly *Cercidium floridum*). Available online: <http://www.public.asu.edu/~camartin/plants/Plant%20html%20files/parkinsoniaflorida.html> (accessed on February 27, 2019).
148. Schuch, U.; Kelly, J. *Mesquite and Palo Verde Trees for the Urban Landscape*; AZ1429; The University of Arizona Cooperative Extension: Tucson, Arizona, 2007; p 9.
149. Shields, J.; Jose, S.; Freeman, J.; Bunyan, M.; Celis, G.; Hagan, D.; Morgan, M.; Pieterse, E.C.; Zak, J. Short-Term Impacts of Laurel Wilt on Redbay (*Persea borbonia* [L.] Spreng.) in a Mixed Evergreen-Deciduous Forest in Northern Florida. *J. Forest.* **2011**, *109*, 82-88.
150. McDonald, G.I.; Martin, N.E.; Harvey, A.E. *Armillaria in the northern Rockies : pathogenicity and host susceptibility on pristine and disturbed sites*; Research Note INT-371; United States Department of Agriculture, Forest Service, Intermountain Research Station: Ogden, UT, 1987; p 12.
151. Arno, S.F.; Hoff, R.J. *Silvics of whitebark pine (Pinus albicaulis)*; Gen. Tech. Rep. INT-GTR-253; United States Department of Agriculture, Forest Service, Intermountain Research Station: Ogden, Utah, 1989.
152. Coop, J.D.; Schoettle, A.W. Fire and high-elevation, five-needle pine (*Pinus aristata* & *P. flexilis*) ecosystems in the southern Rocky Mountains: What do we know? In *The future of high-elevation, five-needle white pines in Western North America: Proceedings of the High Five Symposium*, Keane, R.E., Tomback, D.F., Murray, M.P., Smith, C.M., Eds. United States Department of Agriculture, Forest Service, Rocky Mountain Research Station: Fort Collins, CO, 2011; Vol. Proceedings RMRS-P-63, pp. 164-173.
153. Lanier, G.N. Biosystematics of North American *Ips* (Coleoptera: Scolytidae): Hopping's Group IX. *Can. Entomol.* **1970**, *102*, 1139-1163, doi: <https://doi.org/10.4039/Ent1021139-9>.
154. Gomez, D.F.; Hulcr, J. *Southern pine beetle, Dendroctonus frontalis Zimmermann (Insecta: Coleoptera: Scolytidae)*; EENY-176; University of Florida, Institute of Food and Agricultural Sciences Extension: Gainesville, Florida, 2019; p 8.
155. Coyle, D.R.; Self, A.B.; Floyd, J.D.; Riggins, J.J. *Ips Bark Beetles in the Southeastern U.S.*; SREF-FH-002 Southern Regional Extension Forestry: Athens, Georgia, 2016; p 9.
156. Miller, D.R.; Borden, J.H. Life History and Biology of *Ips latidens* (LeConte) (Coleoptera: Scolytidae). *Can. Entomol.* **1985**, *117*, 859-871, doi: <https://doi.org/10.4039/Ent117859-7>.
157. Camilli, K.S.; Marshall, J.; Owen, D.; Gordon, T.; Wood, D. *Pitch Canker Disease in California*; Tree Note 32; California Department of Forestry and Fire Protection: Sacramento, California, 2013; p 9.
158. Virginia Department of Forestry. *Forest Health Review*; Virginia Department of Forestry: Charlottesville, Virginia, 2016; p 11.
159. Russell, L.M. Notes on *Euphalerus nidifex* Schwarz and Related Nest-Making, New World Psyllids (Homoptera: Psyllidae). *Fla. Entomol.* **1971**, *54*, 3-12.
160. Townsend, K.R. The Dutch elm disease. Boston University, Boston, Massachusetts, 1950.
161. University of Illinois Extension. Dutch Elm Disease. Available online: <http://extension.illinois.edu/focus/index.cfm?problem=dutch-elm-disease> (accessed on March 1, 2019).
162. Boland, J.M. The impact of an invasive ambrosia beetle on the riparian habitats of the Tijuana River Valley, California. *PeerJ* **2016**, *4*, e2141, doi: <https://doi.org/10.7717/peerj.2141>.

163. Solomon, J.D. *Guide to Insect Borers in North American Broadleaf Trees and Shrubs.*; Agriculture Handbook 706; United States Department of Agriculture, Forest Service: Washington, D.C. , 1995.
164. Olsen, M. Diseases of Urban Plants in Arizona. Available online: <http://warnerstreesurgery.com/pdf/Diseases%20of%20Urban%20Plants.pdf> (accessed on August 12).
165. Van Driesche, R.G.; LaForest, J.H.; Barger, C.T.; Reardon, R.C.; Herlihy, M. *Forest Pest Insects in North America: A Photographic Guide*; FHTET-2012-02; United States Department of Agriculture, Forest Service, Forest Health Technology Enterprise Team: Morgantown, West Virginia, 2013; p 702.
166. Trouillas, F.P.; Úrbez-Torres, J.R.; Gubler, W.D. Diversity of diatrypaceous fungi associated with grapevine canker diseases in California. *Mycologia* **2010**, *102*, 319-336, doi: <https://doi.org/10.3852/08-185>.
167. Blackford, D. Management Guide for Forest Tent Caterpillar. In *Forest Insect and Disease Management Guide for the Northern and Central Rocky Mountains*, United States Department of Agriculture, Forest Service, Northern and Intermountain Regions, State and Private Forestry: Missoula, Montana, and Boise, Idaho, 2005; p. 4.
168. Worrall, J.J.; Egeland, L.; Eager, T.; Mask, R.A.; Johnson, E.W.; Kemp, P.A.; Shepperd, W.D. Rapid mortality of *Populus tremuloides* in southwestern Colorado, USA. *Forest Ecol. Manag.* **2008**, *255*, 686-696, doi: <https://doi.org/10.1016/j.foreco.2007.09.071>.
169. Zegler, T.J.; Moore, M.M.; Fairweather, M.L.; Ireland, K.B.; Fulé, P.Z. *Populus tremuloides* mortality near the southwestern edge of its range. *Forest Ecol. Manag.* **2012**, *282*, 196-207, doi: <https://doi.org/10.1016/j.foreco.2012.07.004>.
170. Marchetti, S.B.; Worrall, J.J.; Eager, T. Secondary insects and diseases contribute to sudden aspen decline in southwestern Colorado, USA. *Can. J. Forest Res.* **2011**, *41*, 2315-2325, doi: <https://doi.org/10.1139/x11-106>.
171. Trummer, L.; Hennon, P. *Hazard Trees in Alaska: A Guide to the Identification and Management of Hazard Trees in Alaska*; R10-TP-142; United States Forest Service, Alaska Region, State and Private Forestry: Anchorage, Alaska, 2009; p 62.
172. Guo, Y.H.; Cheng, Z.-M.; Walla, J.A.; Zhang, Z. Large-scale Screening for X-disease Phytoplasma Infection in Chokecherry. *HortScience* **1998**, *33*, 293-295.
173. Guo, Y.H.; Walla, J.A.; Cheng, Z.-M.; Lee, I.-M. X-Disease Confirmation and Distribution in Chokecherry in North Dakota. *Plant Dis.* **1996**, *80*, 95-102, doi: <https://doi.org/10.1094/PD-80-0095>.
174. Gibson, K. Management Guide for Flatheaded Fir Borers In *Forest Insect and Disease Management Guide for the Northern and Central Rocky Mountains*, United States Department of Agriculture, Forest Service, Northern and Intermountain Regions, State and Private Forestry: Missoula, Montana, and Boise, Idaho, 2004; p. 2.
175. O'Brien, J.; Mielke, M.; Starkey, D.; Juzwik, J. *How to Identify, Prevent, and Control Oak Wilt*; NA-FR-01-11; United States Department of Agriculture, Forest Service, Northern Area State & Private Forestry: Newtown Square, Pennsylvania, 2000; p 31.
176. Coleman, T.W.; Graves, A.D.; Hoddle, M.; Heath, Z.; Chen, Y.; Flint, M.L.; Seybold, S.J. Forest stand composition and impacts associated with *Agrilus auroguttatus* Schaeffer (Coleoptera: Buprestidae) and *Agrilus coxalis* Waterhouse in oak woodlands. *Forest Ecol. Manag.* **2012**, *276*, 104-117, doi: <https://doi.org/10.1016/j.foreco.2012.03.011>.
177. Pritchard, E.A.; Beer, R.E. Biology and Control of Asterolecanium Scales on Oaks in California. *J. Econ. Entomol.* **1950**, *43*, 494-497, doi: <https://doi.org/10.1093/jee/43.4.494>.
178. Swiecki, T.J.; Bernhardt, E. *A field guide to insects and diseases of California oaks*; Gen. Tech Rep. PSW-GTR-197; United States Department of Agriculture, Forest Service, Pacific Southwest Research Station: Albany, CA, 2006; p 151.
179. Coleman, T.W.; Seybold, S.J. Collection History and Comparison of the Interactions of the Goldspotted Oak Borer, *Agrilus auroguttatus* Schaeffer (Coleoptera: Buprestidae), with Host Oaks in Southern California and Southeastern Arizona, U.S.A. *Coleopt. Bull.* **2011**, *65*, 93-108, doi: <https://doi.org/10.1649/072.065.0224>.
180. Brasier, C.M.; Denman, S.; Rose, J.; Kirk, S.A.; Hughes, K.J.D.; Griffin, R.L.; Lane, C.R.; Inman, A.J.; Webber, J.F. First report of ramorum bleeding canker on *Quercus falcata*, caused by *Phytophthora ramorum*. *Plant Pathol.* **2004**, *53*, 804-804, doi: <https://doi.org/10.1111/j.1365-3059.2004.01079.x>.

181. Sever, A.; Cranshaw, W.; Brudenell, R. *Agrilus quercicola* (Fisher) (Coleoptera: Buprestidae), the Gambel Oak Borer, as a Pest of *Quercus* spp. *Southwest. Entomol.* **2012**, *37*, 147-150, doi: <https://doi.org/10.3958/059.037.0207>.
182. Donley, D.E.; Acciavatti, R.E. *Red Oak Borer*; Forest Insect & Disease Leaflet 163; United States Department of Agriculture, Forest Service, Northern Area State & Private Forestry: Newtown Square, Pennsylvania, 1980; p 9.
183. Harrington, T.C.; McNew, D.; Yun, H.Y. Bur oak blight, a new disease on *Quercus macrocarpa* caused by *Tubakia iowensis* sp. nov. *Mycologia* **2012**, *104*, 79-92, doi: <https://doi.org/10.3852/11-112>.
184. Walter, J.A.; Finch, F.T.; Johnson, D.M. Re-evaluating fall cankerworm management thresholds for urban and suburban forests. *Agr. Forest Entomol.* **2016**, *18*, 145-150, doi: <https://doi.org/10.1111/afe.12147>.
185. Haack, R.A.; Acciavatti, R.E. *Twolined Chestnut Borer*; Forest Insect & Disease Leaflet 168; United States Department of Agriculture, Forest Service: Washington, D.C., 1992; p 12.
186. Goldman, D.H. Plant Guide: Live Oak. Available online: [https://plants.usda.gov/plantguide/pdf/pg\\_quvi.pdf](https://plants.usda.gov/plantguide/pdf/pg_quvi.pdf) (accessed on February 28, 2019).
187. Rehm, A.; Humm, H.J. *Sphaeroma terebrans*: A Threat to the Mangroves of Southwestern Florida. *Science* **1973**, *182*, 173-174, doi: <https://doi.org/10.1126/science.182.4108.173>.
188. Pasiecznik, N. Invasive Species Compendium: *Rhizophora mangle* (Red Mangrove). Available online: <https://www.cabi.org/isc/datasheet/47509> (accessed on March 1, 2019).
189. Olexa, M.T.; Freeman, T.E. A Gall Disease of Red Mangrove Caused by *Cylindrocarpon didymum*. *Plant Dis. Rep.* **1978**, *62*, 283-286.
190. Woodruff, R.E. A Mangrove Borer, *Poecilips rhizophorae* (Hopkins)(Coleoptera: Scolytidae). *Entomology Circular* **1970**, *98*.
191. Broschat, T.K. *Roystonea regia*: *Royal Palm*; ENH-732; University of Florida, Institute of Food and Agricultural Sciences Extension: Gainesville, Florida, 2014; p 4.
192. Broschat, T.K. *Sabal palmetto*: *Sabal or Cabbage Palm*; ENH-733; University of Florida, Institute of Food and Agricultural Sciences Extension: Gainesville, Florida, 2013; p 5.
193. Eskalen, A.; R., S.; S.C., L.; Rugman-Jones, P.F.; Twizeyimana, M.; A., G.; T., T. Shot Hole Borer Reproductive Hosts. Available online: [https://ucanr.edu/sites/pshb/overview/SHB\\_Reproductive\\_Hosts/](https://ucanr.edu/sites/pshb/overview/SHB_Reproductive_Hosts/) (accessed on March 1, 2019).
194. Billings, R.F.; Grosman, D.M.; Pase, H.A. Soapberry Borer, *Agrilus prionurus* (Coleoptera: Buprestidae): An Exotic Pest Threatens Western Soapberry in Texas. *Southeast. Nat.* **2014**, *13*, 105-116, doi: <https://doi.org/10.1656/058.013.s510>.
195. Kendra, P.E.; Montgomery, W.S.; Niogret, J.; Epsky, N.D. An Uncertain Future for American Lauraceae: A Lethal Threat from Redbay Ambrosia Beetle and Laurel Wilt Disease (A Review). *Am. J. Plant Sci.* **2013**, *Vol.04No.03*, *12*, doi: <https://doi.org/10.4236/ajps.2013.43A092>.
196. Mead, F.W. *False-Mastic Psylla*, *Ceropsylla sideroxyli* Riley (Insecta: Hemiptera: Psyllidae); EENY-370; University of Florida, Institute of Food and Agricultural Sciences Extension: Gainesville, Florida, 2015; p 3.
197. Howard, F.W.; Pemberton, R.W.; Hodges, G.S.; Steinberg, B.; McLean, D.; Liu, H. Host plant range of lobate lac scale, *Paratachardina*, in Florida. *Proc. Fl. State Hort.* **2006**, *119*, 398-408.
198. Dixon, W.N. *Cypress Looper Anacamptodes pergracilis* (Hulst) (Insecta: Lepidoptera: Geometridae); EENY-303; University of Florida, Institute of Food and Agricultural Sciences Extension: Gainesville, Florida, 2016; p 3.
199. Espinosa, A.; Bowman, H.; Hodges, A.; Hodges, G. *Boisduval Scale*, *Diaspis boisduvalii* Signoret (Insecta: Hemiptera: Diaspididae); EENY-467; University of Florida, Institute of Food and Agricultural Sciences Extension: Gainesville, Florida, 2016; p 5.
200. Smith, J.A.; O'Donnell, K.; Mount, L.L.; Shin, K.; Peacock, K.; Trulock, A.; Spector, T.; Cruse-Sanders, J.; Determann, R. A Novel Fusarium Species Causes a Canker Disease of the Critically Endangered Conifer, *Torreya taxifolia*. *Plant Dis.* **2011**, *95*, 633-639, doi: <https://doi.org/10.1094/PDIS-10-10-0703>.
201. United States Department of Agriculture Forest Service. *Pest Alert: Hemlock Borer*; NA-PR-03-00; United States Department of Agriculture, Forest Service, Northeastern Area State and Private Forestry: 2000; p 2.
202. Wilson, C.; Vendettuoli, J.; Orwig, D.; Preisser, E. Impact of an Invasive Insect and Plant Defense on a Native Forest Defoliator. *Insects* **2016**, *7*, 45, doi: <https://doi.org/10.3390/insects7030045>.

203. Hadfield, J.S.; Goheen, D.J.; Filip, G.M.; Schmitt, C.L.; Harvey, R.D. *Root Diseases in Oregon and Washington Conifers*; R6-FPM-250-86; United States Department of Agriculture, Forest Service, Pacific Northwest Region: Portland, Oregon, 1986.
204. University of Amsterdam. Dutch elm disease on CD-ROM. Available online: <http://www.dutchelmdisease.org/EXPERT/DED/CORE/00/00/80.HTML> (accessed on February 28, 2019).
205. Fraedrich, S.W. California Laurel Is Susceptible to Laurel Wilt Caused by *Raffaelea lauricola*. *Plant Dis.* **2008**, *92*, 1469-1469, doi: <https://doi.org/10.1094/PDIS-92-10-1469A>.
206. Gilbertson, R.L. Wood-Rotting Fungi of North America. *Mycologia* **1980**, *72*, 1-49, doi: <https://doi.org/10.2307/3759417>.

**Table S2.** The 339 insect, disease, and parasitic higher plant agents identified as among the most important threats to each of 419 North American tree species. Nonnative invasive agents are indicated with \*. The list includes the guilds of the insect agents, and the number of host tree species identified for each agent.

| Agent                                                          | Guild                  | Hosts |
|----------------------------------------------------------------|------------------------|-------|
| <b><i>Insects</i></b>                                          |                        |       |
| Alder bark beetle ( <i>Alniphagus aspericollis</i> )           | Phloem- or Wood-Borers | 1     |
| Asian longhorned beetle ( <i>Anoplophora glabripennis</i> )*   | Phloem- or Wood-Borers | 43    |
| Asiatic oak weevil ( <i>Cyrtopistomus castaneus</i> )*         | Foliage-Feeders        | 3     |
| Bagworm ( <i>Thyridopteryx ephemeraeformis</i> )               | Foliage-Feeders        | 4     |
| Baldcypress leafroller ( <i>Archips goyerana</i> )             | Foliage-Feeders        | 1     |
| Balsam woolly adelgid ( <i>Adelges piceae</i> )*               | Sap-Feeders            | 5     |
| Banded elm bark beetle ( <i>Scolytus schevyrewi</i> )*         | Phloem- or Wood-Borers | 2     |
| Bark beetle ( <i>Ips spinifer</i> )                            | Phloem- or Wood-Borers | 1     |
| Bark beetle ( <i>Liparthrum arizonicum</i> )                   | Phloem- or Wood-Borers | 1     |
| Bark beetle ( <i>Orthotomicus spinifer</i> )                   | Phloem- or Wood-Borers | 1     |
| Birch leafminer ( <i>Fenusa pusilla</i> )*                     | Foliage-Feeders        | 3     |
| Black stem borer ( <i>Xylosandrus germanus</i> )*              | Phloem- or Wood-Borers | 1     |
| Black twig borer ( <i>Xylosandrus compactus</i> )*             | Phloem- or Wood-Borers | 2     |
| Black vine weevil ( <i>Otiorhynchus sulcatus</i> )*            | Foliage-Feeders        | 2     |
| Black-horned juniper borer ( <i>Callidium texanum</i> )        | Phloem- or Wood-Borers | 1     |
| Blue spruce engraver ( <i>Ips hunteri</i> )                    | Phloem- or Wood-Borers | 1     |
| Boisduval Scale ( <i>Diaspis boisduvalii</i> )                 | Sap-Feeders            | 2     |
| Borer ( <i>Megacyllene antennata</i> )                         | Phloem- or Wood-Borers | 3     |
| Bronze birch borer ( <i>Agrilus anxius</i> )                   | Phloem- or Wood-Borers | 4     |
| Bronze poplar borer ( <i>Agrilus liragus</i> )                 | Phloem- or Wood-Borers | 1     |
| Cactus longhorn beetle ( <i>Moneilema gigas</i> )              | Phloem- or Wood-Borers | 1     |
| Calico scale ( <i>Eulecanium cerasorum</i> )*                  | Sap-Feeders            | 3     |
| California fivespined ips ( <i>Ips paraconfusus</i> )          | Phloem- or Wood-Borers | 1     |
| California flatheaded borer ( <i>Melanophila californica</i> ) | Phloem- or Wood-Borers | 1     |
| California oakworm ( <i>Phryganidia californica</i> )          | Foliage-Feeders        | 1     |
| Cardin's whitefly ( <i>Metaleurodicus cardini</i> )*           | Sap-Feeders            | 1     |
| Catalpa sphinx moth ( <i>Ceratonia catalpae</i> )              | Foliage-Feeders        | 2     |
| Cedar bark beetle ( <i>Phloeosinus</i> spp.)                   | Phloem- or Wood-Borers | 7     |
| Cherry bark tortrix ( <i>Enarmonia formosana</i> )*            | Phloem- or Wood-Borers | 8     |
| Chestnut gall wasp ( <i>Dryocosmus kuriphilus</i> )*           | Foliage-Feeders        | 1     |
| Cottonwood borer ( <i>Plectrodera scalator</i> )               | Phloem- or Wood-Borers | 2     |
| Cottonwood leaf beetle ( <i>Chrysomela scripta</i> )           | Foliage-Feeders        | 4     |
| Cypress looper ( <i>Anacamptodes pergracilus</i> )             | Foliage-Feeders        | 2     |
| Dogwood borer ( <i>Synanthedon scitula</i> )                   | Phloem- or Wood-Borers | 1     |
| Dogwood clubgall midge ( <i>Resseliella clavula</i> )          | Foliage-Feeders        | 1     |
| Dogwood twig borer ( <i>Oberea tripunctata</i> )               | Phloem- or Wood-Borers | 1     |
| Douglas-fir beetle ( <i>Dendroctonus pseudotsugae</i> )        | Phloem- or Wood-Borers | 1     |
| Douglas-fir tussock moth ( <i>Orgyia pseudotsugata</i> )       | Foliage-Feeders        | 2     |

| Agent                                                            | Guild                  | Hosts |
|------------------------------------------------------------------|------------------------|-------|
| Eastern juniper bark beetle ( <i>Phloeosinus dentatus</i> )      | Phloem- or Wood-Borers | 2     |
| Eastern tent caterpillar ( <i>Malacosoma americanum</i> )        | Foliage-Feeders        | 7     |
| Edwards wasp moth ( <i>Lymire edwardsii</i> )                    | Foliage-Feeders        | 2     |
| Elongate hemlock scale ( <i>Fiorinia externa</i> )*              | Sap-Feeders            | 2     |
| Emerald ash borer ( <i>Agrilus planipennis</i> )*                | Phloem- or Wood-Borers | 15    |
| European pine sawfly ( <i>Neodiprion sertifer</i> )*             | Foliage-Feeders        | 1     |
| Fall cankerworm ( <i>Alsophila pometaria</i> )                   | Foliage-Feeders        | 2     |
| False-mastic psylla ( <i>Ceropsylla sideroxyli</i> )             | Sap-Feeders            | 1     |
| Ficus whitefly ( <i>Singhiella simplex</i> )*                    | Sap-Feeders            | 2     |
| Fiddlewood leafroller ( <i>Epicorsia oedipodalis</i> )           | Foliage-Feeders        | 2     |
| Fir engraver ( <i>Scolytus ventralis</i> )                       | Phloem- or Wood-Borers | 4     |
| Flatheaded apple tree borer ( <i>Chrysobothris femorata</i> )    | Phloem- or Wood-Borers | 1     |
| Flatheaded fir borer ( <i>Melanophila drummondi</i> )            | Phloem- or Wood-Borers | 1     |
| Florida wax scale ( <i>Ceroplastes floridensis</i> )             | Sap-Feeders            | 2     |
| Forest tent caterpillar ( <i>Malacosoma disstria</i> )           | Foliage-Feeders        | 28    |
| Gambel oak borer ( <i>Agrilus quercicola</i> )                   | Phloem- or Wood-Borers | 1     |
| Geiger tortoise beetle ( <i>Eurypepla calochroma</i> )           | Foliage-Feeders        | 1     |
| Geometrid moth ( <i>Stamnodes animata</i> )*                     | Foliage-Feeders        | 1     |
| Giant palm borer ( <i>Dinapate wrightii</i> )                    | Phloem- or Wood-Borers | 1     |
| Goldspotted oak borer ( <i>Agrilus auroguttatus</i> )            | Phloem- or Wood-Borers | 7     |
| Green alder sawfly ( <i>Monsoma pulveratum</i> )*                | Foliage-Feeders        | 2     |
| Gypsy moth ( <i>Lymantria dispar dispar</i> )*                   | Foliage-Feeders        | 65    |
| Hackberry butterfly ( <i>Asterocampa celtis</i> )                | Foliage-Feeders        | 1     |
| Hackberry engraver ( <i>Scolytus muticus</i> )                   | Phloem- or Wood-Borers | 1     |
| Hackberry nipplegall maker ( <i>Pachypsylla celtidismamma</i> )* | Foliage-Feeders        | 1     |
| Hemlock borer ( <i>Melanophila fulvoguttata</i> )                | Phloem- or Wood-Borers | 2     |
| Hemlock looper ( <i>Lambdina fiscellaria</i> )                   | Foliage-Feeders        | 2     |
| Hemlock woolly adelgid ( <i>Adelges tsugae</i> )*                | Sap-Feeders            | 2     |
| Hickory bark beetle ( <i>Scolytus quadrispinosus</i> )           | Phloem- or Wood-Borers | 8     |
| Hickory borer ( <i>Goes pulcher</i> )                            | Phloem- or Wood-Borers | 5     |
| Hickory spiral borer ( <i>Agrilus arcuatus torquatus</i> )       | Phloem- or Wood-Borers | 2     |
| Honeylocust agrilus ( <i>Agrilus difficilis</i> )                | Phloem- or Wood-Borers | 1     |
| Jack pine budworm ( <i>Choristoneura pinus</i> )                 | Foliage-Feeders        | 1     |
| Japanese beetle ( <i>Popillia japonica</i> )*                    | Foliage-Feeders        | 14    |
| Jeffrey pine beetle ( <i>Dendroctonus jeffreyi</i> )             | Phloem- or Wood-Borers | 1     |
| Juniper borer ( <i>Atimia huachucae</i> )                        | Phloem- or Wood-Borers | 1     |
| Juniper scale ( <i>Carulaspis juniperi</i> )*                    | Sap-Feeders            | 16    |
| Juniper twig pruner ( <i>Styloxus bicolor</i> )                  | Phloem- or Wood-Borers | 1     |
| Lac scale ( <i>Tachardiella mexicana</i> )                       | Sap-Feeders            | 1     |
| Larch casebearer ( <i>Coleophora laricella</i> )*                | Foliage-Feeders        | 2     |
| Larch sawfly ( <i>Pristiphora erichsonii</i> )                   | Foliage-Feeders        | 3     |
| Linden looper ( <i>Erranis tiliaria</i> )                        | Foliage-Feeders        | 1     |
| Lobate lac scale ( <i>Paratachardina pseudolobata</i> )*         | Sap-Feeders            | 6     |

| Agent                                                              | Guild                  | Hosts |
|--------------------------------------------------------------------|------------------------|-------|
| Locust borer ( <i>Megacyllene robiniae</i> )                       | Phloem- or Wood-Borers | 2     |
| Locust leafminer ( <i>Odontota dorsalis</i> )                      | Foliage-Feeders        | 2     |
| Locust twig borer ( <i>Ecdytolopha insiticiana</i> )               | Phloem- or Wood-Borers | 1     |
| Madrone thrips ( <i>Thrips madronii</i> )                          | Foliage-Feeders        | 1     |
| Magnolia scale ( <i>Neolecanium cornuparvum</i> )                  | Sap-Feeders            | 3     |
| Mahogany shoot borer ( <i>Hypsipyla grandella</i> )                | Phloem- or Wood-Borers | 1     |
| Mimosa webworm ( <i>Homadaula anisocentra</i> )*                   | Foliage-Feeders        | 1     |
| Monterey pine weevil ( <i>Pissodes radiatae</i> )*                 | Phloem- or Wood-Borers | 2     |
| Mountain mahogany bark beetle ( <i>Chaetophloeus heterodoxus</i> ) | Phloem- or Wood-Borers | 1     |
| Mountain pine beetle ( <i>Dendroctonus ponderosae</i> )            | Phloem- or Wood-Borers | 10    |
| Mountain-mahogany looper ( <i>Iridopsis clivinaria</i> )           | Foliage-Feeders        | 1     |
| North American pine engraver ( <i>Ips pini</i> )                   | Phloem- or Wood-Borers | 1     |
| Oak pit scale ( <i>Asterolecanium</i> spp.)*                       | Sap-Feeders            | 9     |
| Oystershell scale ( <i>Lepidosaphes ulmi</i> )*                    | Sap-Feeders            | 21    |
| Palo verde root borers ( <i>Derobrachus geminatus</i> )            | Phloem- or Wood-Borers | 1     |
| Pecan carpenterworm ( <i>Cossula magnifica</i> )                   | Phloem- or Wood-Borers | 1     |
| Pine engraver beetles ( <i>Ips</i> spp.)                           | Phloem- or Wood-Borers | 17    |
| Pine shoot beetle ( <i>Tomicus piniperda</i> )*                    | Phloem- or Wood-Borers | 1     |
| Pink hibiscus mealybug ( <i>Maconellicoccus hirsutus</i> )*        | Sap-Feeders            | 2     |
| Pinon twig beetle ( <i>Pityophthorus punctifrons</i> )             | Phloem- or Wood-Borers | 1     |
| Pinyon ips ( <i>Ips confusus</i> )                                 | Phloem- or Wood-Borers | 4     |
| Pinyon needle scale ( <i>Matsucoccus acalyptus</i> )               | Sap-Feeders            | 6     |
| Pinyon sawfly ( <i>Neodiprion edulicolus</i> )                     | Foliage-Feeders        | 3     |
| Polyphagous shot hole borer ( <i>Euvallacea</i> spp.)*             | Phloem- or Wood-Borers | 6     |
| Poplar borer ( <i>Saperda calcarata</i> )                          | Phloem- or Wood-Borers | 7     |
| Poplar-and-willow borer ( <i>Cryptorhynchus lapathi</i> )*         | Phloem- or Wood-Borers | 2     |
| Psyllid ( <i>Euphalerus nidifex</i> )                              | Foliage-Feeders        | 1     |
| Red oak borer ( <i>Enaphalodes rufulus</i> )                       | Phloem- or Wood-Borers | 10    |
| Red pine scale ( <i>Matsucoccus resinosae</i> )*                   | Sap-Feeders            | 1     |
| Redheaded pine sawfly ( <i>Neodiprion lecontei</i> )               | Foliage-Feeders        | 1     |
| Rhododendron stem borer ( <i>Oberea myops</i> )                    | Phloem- or Wood-Borers | 1     |
| Roundheaded pine beetle ( <i>Dendroctonus adjunctus</i> )          | Phloem- or Wood-Borers | 1     |
| Royal palm bug ( <i>Xylastodoris luteolus</i> )                    | Sap-Feeders            | 1     |
| Rugose spiraling whitefly ( <i>Aleurodicus rugioperculatus</i> )*  | Sap-Feeders            | 1     |
| Sawfly ( <i>Neodiprion</i> spp.)                                   | Foliage-Feeders        | 4     |
| Scale insect ( <i>Phalacrocooccus howertoni</i> )                  | Sap-Feeders            | 3     |
| Silver fir beetle ( <i>Pseudohylesinus sericeus</i> )              | Phloem- or Wood-Borers | 1     |
| Soapberry borer ( <i>Agrilus prionurus</i> )*                      | Phloem- or Wood-Borers | 1     |
| Southern cypress bark beetle ( <i>Phloeosinus taxodii</i> )        | Phloem- or Wood-Borers | 3     |
| Southern pine beetle ( <i>Dendroctonus frontalis</i> )             | Phloem- or Wood-Borers | 12    |
| Spruce beetle ( <i>Dendroctonus rufipennis</i> )                   | Phloem- or Wood-Borers | 6     |
| Spruce budworm ( <i>Choristoneura fumiferana</i> )                 | Foliage-Feeders        | 5     |
| Sri Lankan weevil ( <i>Myllocerus undecimpustulatus undatus</i> )* | Foliage-Feeders        | 1     |



| Agent                                                                                   | Guild                  | Hosts |
|-----------------------------------------------------------------------------------------|------------------------|-------|
| Sycamore borer ( <i>Synanthedon respiciens</i> )                                        | Phloem- or Wood-Borers | 1     |
| Sycamore lace bug ( <i>Corythucha ciliata</i> )                                         | Foliage-Feeders        | 1     |
| Tent caterpillar ( <i>Malacosoma</i> spp.)                                              | Foliage-Feeders        | 6     |
| Thousand cankers disease ( <i>Geosmithia morbida</i> / <i>Pityophthorus juglandis</i> ) | Phloem- or Wood-Borers | 6     |
| True fir bark beetles ( <i>Scolytus dentatus</i> )                                      | Phloem- or Wood-Borers | 1     |
| Tuliptree scale ( <i>Toumeyella liriodendri</i> )                                       | Sap-Feeders            | 2     |
| Tupelo leafminer ( <i>Antispila nysaeoliella</i> )                                      | Foliage-Feeders        | 4     |
| Twig beetle ( <i>Pityophthorus boycei</i> )                                             | Phloem- or Wood-Borers | 1     |
| Twig beetles ( <i>Pityophthorus</i> spp.)                                               | Phloem- or Wood-Borers | 1     |
| Twig girdler ( <i>Oncideres cingulata</i> )                                             | Phloem- or Wood-Borers | 9     |
| Twig girdler ( <i>Oncideres pustulatus</i> )                                            | Phloem- or Wood-Borers | 1     |
| Twolined chestnut borer ( <i>Agrilus bilineatus</i> )                                   | Phloem- or Wood-Borers | 31    |
| Two-spotted spider mite ( <i>Tetranychus urticae</i> )                                  | Sap-Feeders            | 1     |
| Virginia pine sawfly ( <i>Neodiprion pratti</i> )                                       | Foliage-Feeders        | 1     |
| Walkingstick ( <i>Diapheromera femorata</i> )                                           | Foliage-Feeders        | 1     |
| Walnut caterpillar ( <i>Datana integerrima</i> )                                        | Foliage-Feeders        | 1     |
| Western balsam bark beetle ( <i>Dryocoetes confusus</i> )                               | Phloem- or Wood-Borers | 2     |
| Western hemlock looper ( <i>Lambdina fiscellaria lugubrosa</i> )                        | Foliage-Feeders        | 1     |
| Western pine beetle ( <i>Dendroctonus brevicomis</i> )                                  | Phloem- or Wood-Borers | 1     |
| Western spruce budworm ( <i>Choristoneura freemani</i> )                                | Foliage-Feeders        | 7     |
| White pine weevil ( <i>Pissodes strobi</i> )                                            | Phloem- or Wood-Borers | 6     |
| Winter moth ( <i>Operophtera brumata</i> )*                                             | Foliage-Feeders        | 8     |
| Wood borer ( <i>Coccotrypes rhizophorae</i> )*                                          | Phloem- or Wood-Borers | 1     |
| Wood borer ( <i>Sphaeroma terebrans</i> )*                                              | Phloem- or Wood-Borers | 1     |
| Wood-boring beetle ( <i>Dicerca horni</i> )                                             | Phloem- or Wood-Borers | 1     |
| Yellow poplar weevil ( <i>Odontopus calceatus</i> )                                     | Foliage-Feeders        | 1     |
| <b><u>Diseases</u></b>                                                                  |                        |       |
| Alder canker ( <i>Valsa melanodiscus</i> )                                              | .                      | 3     |
| Anthraxnose ( <i>Apiognomonina veneta</i> )                                             | .                      | 3     |
| Apple mosaic virus (ApMV)                                                               | .                      | 2     |
| Apple scab ( <i>Venturia inaequalis</i> )                                               | .                      | 4     |
| Arbutus canker ( <i>Natrassia mangiferae</i> )                                          | .                      | 2     |
| Armillaria root disease ( <i>Armillaria</i> spp.)                                       | .                      | 35    |
| Artist's conk ( <i>Ganoderma applanatum</i> )                                           | .                      | 11    |
| Ash yellows (Candidatus <i>Phytoplasma fraxini</i> )                                    | .                      | 14    |
| Bacterial leaf blight ( <i>Pseudomonas lauraceum</i> )                                  | .                      | 1     |
| Bacterial leaf scorch ( <i>Xylella fastidiosa</i> )                                     | .                      | 15    |
| Bacterial necrosis ( <i>Erwinia cacticida</i> )                                         | .                      | 1     |
| Bacterial spot ( <i>Xanthomonas campestris</i> pv. <i>pruni</i> )                       | .                      | 6     |
| Basal canker and butt rot ( <i>Kretzschmaria deusta</i> )                               | .                      | 3     |
| Beech bark disease ( <i>Neonectria</i> spp./ <i>Cryptococcus fagisuga</i> )*            | .                      | 1     |
| Birch rust ( <i>Melampsorium betulinum</i> )                                            | .                      | 1     |



| Agent                                                                                      | Guild | Hosts |
|--------------------------------------------------------------------------------------------|-------|-------|
| Black knot ( <i>Apiosporina morbosa</i> )                                                  | .     | 12    |
| Black root rot ( <i>Thielaviopsis basicola</i> )                                           | .     | 1     |
| Blackline (Cherry leafroll virus)                                                          | .     | 1     |
| Black-stain root disease ( <i>Leptographium wageneri</i> )                                 | .     | 1     |
| Blister canker ( <i>Biscogniauxia marginata</i> )                                          | .     | 3     |
| Bot canker ( <i>Botryosphaeria corticola</i> )                                             | .     | 1     |
| Botryosphaeria canker ( <i>Botryosphaeria ribis</i> )                                      | .     | 2     |
| Broom rust ( <i>Gymnosporangium libocedri</i> )                                            | .     | 1     |
| Brown cubical rot ( <i>Poria sequoiae</i> )                                                | .     | 1     |
| Brown spot needle blight ( <i>Mycosphaerella dearnessii</i> )                              | .     | 1     |
| Brown trunk rot ( <i>Fomitopsis officinalis</i> )                                          | .     | 1     |
| Bunch disease (Phytoplasma strains in subgroup of Prunus X-disease group)                  | .     | 2     |
| Bur oak blight ( <i>Tubakia dryina</i> )                                                   | .     | 1     |
| Butt rot ( <i>Hericium erinaceus</i> )                                                     | .     | 2     |
| Butt rot fungi ( <i>Phellinus swieteniae</i> )                                             | .     | 1     |
| Butternut canker ( <i>Sirococcus clavignenti-juglandacearum</i> )*                         | .     | 1     |
| Canadian pine scale ( <i>Matsucoccus macrocitrices</i> )/ <i>Caliciopsis pinea</i> complex | .     | 1     |
| Canker ( <i>Cryptosphaeria pullmanensis</i> )                                              | .     | 1     |
| Canker ( <i>Phytophthora cambivora</i> )                                                   | .     | 1     |
| Canker disease ( <i>Fusarium</i> spp.)                                                     | .     | 1     |
| Canker rot of oak ( <i>Inonotus andersonii</i> )                                           | .     | 8     |
| Canker-rot ( <i>Inonotus</i> spp.)                                                         | .     | 1     |
| Catalpa midge ( <i>Cecidomyia catalpae</i> )                                               | .     | 2     |
| Cercospora blight ( <i>Asperisporium sequoiae</i> )                                        | .     | 7     |
| Cercospora blight of juniper ( <i>Pseudocercospora juniperi</i> )                          | .     | 3     |
| Cherry leaf spot ( <i>Blumeriella jaapii</i> )                                             | .     | 12    |
| Chestnut blight ( <i>Cryphonectria parasitica</i> )*                                       | .     | 3     |
| Clitocybe root rot ( <i>Armillaria tabescens</i> )                                         | .     | 1     |
| Collar rot ( <i>Phytophthora siskiyouensis</i> )                                           | .     | 2     |
| Comandra blister rust ( <i>Cronartium comandrae</i> )                                      | .     | 5     |
| Coral spot fungus ( <i>Nectria cinnabarina</i> )                                           | .     | 2     |
| Cotton root rot ( <i>Phymatotrichopsis omnivora</i> )                                      | .     | 2     |
| Crown canker and root rot ( <i>Phytophthora cactorum</i> )                                 | .     | 4     |
| Crown gall ( <i>Agrobacterium tumefaciens</i> )                                            | .     | 2     |
| Cytospora canker ( <i>Cytospora chrysosperma</i> )                                         | .     | 2     |
| Cytospora canker of spruce ( <i>Cytospora kunzei</i> )                                     | .     | 1     |
| Decay ( <i>Trametes versicolor</i> )                                                       | .     | 2     |
| Didymascella leaf blight ( <i>Didymascella thujina</i> )                                   | .     | 1     |
| Dogwood anthracnose ( <i>Discula destructiva</i> )*                                        | .     | 3     |
| Dutch elm disease ( <i>Ophiostoma novo-ulmi</i> )*                                         | .     | 7     |
| Elm yellows (Candidatus <i>Phytoplasma ulmi</i> )                                          | .     | 6     |
| Elytroderma needle cast ( <i>Elytroderma deformans</i> )                                   | .     | 4     |
| Endothia canker ( <i>Endothia gyrosa</i> )                                                 | .     | 7     |

| Agent                                                                                             | Guild | Hosts |
|---------------------------------------------------------------------------------------------------|-------|-------|
| European larch canker ( <i>Lachnellula willkommii</i> )*                                          | .     | 1     |
| Eutypella canker ( <i>Eutypella parasitica</i> )                                                  | .     | 3     |
| False smut of palms ( <i>Graphiloa phoenicis</i> )                                                | .     | 2     |
| Fire blight ( <i>Erwinia amylovora</i> )                                                          | .     | 11    |
| Foliage diseases ( <i>Bifusella</i> spp.)                                                         | .     | 1     |
| Fusarium wilt ( <i>Fusarium oxysporum</i> f. sp. <i>rhois</i> )                                   | .     | 1     |
| Fusiform rust ( <i>Cronartium quercuum</i> f. sp. <i>fusiforme</i> )                              | .     | 5     |
| Gall disease ( <i>Cylindrocarpon didymum</i> )                                                    | .     | 1     |
| Gall rust ( <i>Cronartium quercuum</i> )                                                          | .     | 3     |
| Gall rust of Virginia pine ( <i>Cronartium quercuum</i> f. sp. <i>virginianae</i> )               | .     | 1     |
| Ganoderma butt rot ( <i>Ganoderma zonatum</i> )                                                   | .     | 3     |
| Ganoderma root and butt rot ( <i>Ganoderma australe</i> )                                         | .     | 1     |
| Ganoderma root and butt rot ( <i>Ganoderma meredithae</i> )                                       | .     | 1     |
| Ganoderma rot of hardwoods ( <i>Ganoderma lucidum</i> )                                           | .     | 4     |
| Guignardia blotch ( <i>Guignardia aesculi</i> )                                                   | .     | 2     |
| Hackberry witches-broom complex ( <i>Podosphaera phytoptophila</i> / <i>Aceria celtis</i> )       | .     | 2     |
| Hawthorn rust ( <i>Gymnosporangium globosum</i> )                                                 | .     | 1     |
| Heart rot ( <i>Flammulina velutipes</i> )                                                         | .     | 1     |
| Heart rot ( <i>Inonotus glomeratus</i> )                                                          | .     | 2     |
| Heart rot fungi ( <i>Phellinus robiniae</i> )                                                     | .     | 2     |
| Heterobasidion root disease ( <i>Heterobasidion</i> spp.)                                         | .     | 21    |
| Heterobasidion root disease P-type ( <i>Heterobasidion irregulare</i> )                           | .     | 12    |
| Hispidus canker ( <i>Inonotus hispidus</i> )                                                      | .     | 4     |
| Hornbeam anthracnose ( <i>Apiosporopsis carpineae</i> )                                           | .     | 1     |
| Hypoxylon canker of aspen ( <i>Entoleuca mammata</i> )                                            | .     | 1     |
| Hypoxylon canker of oak ( <i>Biscogniauxia atropunctata</i> var. <i>atropunctata</i> )            | .     | 55    |
| Indian paint fungus ( <i>Echinodontium tinctorium</i> )                                           | .     | 4     |
| Juniper pocket rot ( <i>Pyrofomes demidoffii</i> )                                                | .     | 2     |
| Laminated root rot ( <i>Phellinus sulphurascens</i> )                                             | .     | 8     |
| Laminated root rot ( <i>Phellinus weirii</i> )                                                    | .     | 1     |
| Larch needle blight ( <i>Hypodermella laricis</i> )                                               | .     | 1     |
| Laurel wilt ( <i>Raffaelea lauricola</i> )/redbay ambrosia beetle ( <i>Xyleborus glabratus</i> )* | .     | 3     |
| Leaf blight and fruit rot ( <i>Monilinia johnsonii</i> )                                          | .     | 6     |
| Leaf curl and witches broom ( <i>Taphrina wiesneri</i> )                                          | .     | 2     |
| Leaf spot disease ( <i>Cristulariella depraedans</i> )                                            | .     | 1     |
| Limb rust ( <i>Cronartium arizonicum</i> )                                                        | .     | 1     |
| Limb rust ( <i>Cronartium</i> sp.)                                                                | .     | 1     |
| Lophodermium needle cast ( <i>Lophodermium</i> spp.)                                              | .     | 1     |
| Madrone canker ( <i>Neofusicoccum arbuti</i> )                                                    | .     | 2     |
| Melampsora leaf rust ( <i>Melampsora medusae</i> )                                                | .     | 1     |
| Nectria canker ( <i>Nectria ditissima</i> )                                                       | .     | 18    |
| Nectria canker ( <i>Nectria magnoliae</i> )                                                       | .     | 1     |
| Nectria canker ( <i>Nectria</i> sp.)                                                              | .     | 1     |

| Agent                                                                                          | Guild | Hosts |
|------------------------------------------------------------------------------------------------|-------|-------|
| Nectriella gall ( <i>Nectriella pironii</i> )                                                  | .     | 1     |
| Needle cast ( <i>Lirula nervisequia</i> var. <i>conspicua</i> )                                | .     | 1     |
| Nematode ( <i>Rotylenchulus reniformis</i> )                                                   | .     | 1     |
| Oak bracket ( <i>Inonotus dryadeus</i> )                                                       | .     | 4     |
| Oak wilt ( <i>Bretziella fagacearum</i> )*                                                     | .     | 61    |
| Persimmon wilt ( <i>Acremonium diospyri</i> )                                                  | .     | 1     |
| Pezicula trunk and branch cankers ( <i>Pezicula subcarnea</i> )                                | .     | 1     |
| Phytophthora disease of alders ( <i>Phytophthora</i> sp.)                                      | .     | 3     |
| Phytophthora root rot ( <i>Phytophthora cinnamomi</i> )*                                       | .     | 8     |
| Pinyon blister rust ( <i>Cronartium occidentale</i> )                                          | .     | 6     |
| Pit canker ( <i>Phytophthora inflata</i> )                                                     | .     | 1     |
| Pitch canker ( <i>Fusarium circinatum</i> )*                                                   | .     | 10    |
| Pocket dry rot ( <i>Tyromyces amarus</i> )                                                     | .     | 1     |
| Poplar rust ( <i>Melampsora abietis-canadensis</i> )                                           | .     | 4     |
| Poplar rust ( <i>Melampsora occidentalis</i> )                                                 | .     | 1     |
| Port-Orford-cedar root disease ( <i>Phytophthora lateralis</i> )*                              | .     | 2     |
| Powdery mildew ( <i>Erysiphe flexuosa</i> )                                                    | .     | 3     |
| Powdery mildew ( <i>Phyllactinia guttata</i> )                                                 | .     | 1     |
| Prunus X-disease ( <i>Phytoplasma</i> )                                                        | .     | 2     |
| Red heart fungus ( <i>Stereum sanguinolentum</i> )                                             | .     | 1     |
| Red ring rot ( <i>Phellinus pini</i> var. <i>cancriformans</i> )                               | .     | 1     |
| Red ring rot ( <i>Phellinus pini</i> )                                                         | .     | 3     |
| Red ring rot canker ( <i>Phenillus cancriformans</i> )                                         | .     | 1     |
| Red root and butt rot ( <i>Onnia tomentosa</i> )                                               | .     | 7     |
| Red-belted fungus ( <i>Fomitopsis pinicola</i> )                                               | .     | 2     |
| Root rot ( <i>Cylindrocladium scoparium</i> )                                                  | .     | 1     |
| Root-knot nematode ( <i>Meloidogyne</i> spp.)                                                  | .     | 1     |
| Rust ( <i>Gymnosporangium cunninghamianum</i> )                                                | .     | 3     |
| Rust ( <i>Gymnosporangium</i> spp.)                                                            | .     | 8     |
| Rust ( <i>Ravenelia</i> spp.)                                                                  | .     | 1     |
| Rust ( <i>Ravenelia versatilis</i> )                                                           | .     | 1     |
| Rust fungus ( <i>Melampsorella caryophyllacearum</i> )                                         | .     | 1     |
| Scab and black canker of willow ( <i>Venturia saliciperda</i> / <i>Glomerella miyabeana</i> )* | .     | 13    |
| Schweinitzii root and butt rot ( <i>Phaeolus schweinitzii</i> )                                | .     | 6     |
| Scleroderris canker ( <i>Gremmeniella abietina</i> )*                                          | .     | 1     |
| Seiridium canker ( <i>Seiridium cardinale</i> )                                                | .     | 13    |
| Sooty bark canker ( <i>Encoelia pruinosa</i> )                                                 | .     | 1     |
| Sooty canker ( <i>Fusicoccum mangiferum</i> )                                                  | .     | 2     |
| Spiculosa canker ( <i>Phellinus spiculosus</i> )                                               | .     | 6     |
| Stem canker ( <i>Fusarium solani</i> )                                                         | .     | 5     |
| Sterile conk trunk rot ( <i>Inonotus obliquus</i> )                                            | .     | 3     |
| Stigmina leaf spot ( <i>Stigmina palmivora</i> )                                               | .     | 1     |
| Stunt nematode ( <i>Tylenchorhynchus</i> spp.)                                                 | .     | 1     |

| Agent                                                                      | Guild | Hosts |
|----------------------------------------------------------------------------|-------|-------|
| Sudden oak death ( <i>Phytophthora ramorum</i> )*                          | .     | 12    |
| Sycamore canker ( <i>Ceratocystis fimbriata</i> f. <i>platani</i> )        | .     | 1     |
| Tar spot ( <i>Diatractium cordianum</i> )                                  | .     | 1     |
| Texas Phoenix palm decline (Candidatus <i>Phytoplasma palmae</i> )         | .     | 2     |
| Thielaviopsis trunk rot ( <i>Thielaviopsis paradoxa</i> )                  | .     | 3     |
| Thyronectria canker ( <i>Pleonectria austroamericana</i> )                 | .     | 2     |
| Tinder conk ( <i>Fomes fomentarius</i> )                                   | .     | 1     |
| Valsa canker and dieback ( <i>Valsa abietis</i> )                          | .     | 1     |
| Verticillium wilt ( <i>Verticillium albo-atrum</i> )                       | .     | 15    |
| Verticillium wilt ( <i>Verticillium dahliae</i> )                          | .     | 4     |
| Verticillium wilt ( <i>Verticillium</i> spp.)                              | .     | 5     |
| Western gall rust ( <i>Endocronartium harknessii</i> )                     | .     | 4     |
| White mottled rot ( <i>Ganoderma</i> spp.)                                 | .     | 13    |
| White pine blister rust ( <i>Cronartium ribicola</i> )*                    | .     | 9     |
| White pine needle cast ( <i>Lophodermella arcuata</i> )                    | .     | 1     |
| White ring rot ( <i>Obba rivulosa</i> )                                    | .     | 1     |
| White rot ( <i>Bjerkandera adusta</i> )                                    | .     | 1     |
| White rot ( <i>Phellinus badius</i> )                                      | .     | 1     |
| White rot ( <i>Phellinus weirianus</i> )                                   | .     | 1     |
| White spongy rot ( <i>Phellinus igniarius</i> )                            | .     | 6     |
| Willow witches'-broom ( <i>Phytoplasma</i> , members of the yellows group) | .     | 2     |
| Witches broom ( <i>Phytoplasma</i> )                                       | .     | 1     |
| Witches'-broom ( <i>Apiosporina collinsii</i> )                            | .     | 3     |
| Wood decay ( <i>Phellinus gilvus</i> )                                     | .     | 2     |
| Wood rotting ( <i>Phanerochaete tuberculata</i> )                          | .     | 1     |
| <b><u>Parasitic Higher Plants</u></b>                                      |       |       |
| Apache dwarf mistletoe ( <i>Arceuthobium apachecum</i> )                   | .     | 1     |
| Coastal dwarf mistletoe ( <i>Arceuthobium littorum</i> )                   | .     | 1     |
| Dwarf mistletoe ( <i>Arceuthobium californicum</i> )                       | .     | 1     |
| Dwarf mistletoe ( <i>Arceuthobium gillii</i> )                             | .     | 1     |
| Dwarf mistletoe ( <i>Arceuthobium monticola</i> )                          | .     | 1     |
| Dwarf mistletoe ( <i>Arceuthobium occidentale</i> )                        | .     | 2     |
| Dwarf mistletoe ( <i>Arceuthobium</i> spp.)                                | .     | 6     |
| Eastern dwarf mistletoe ( <i>Arceuthobium pusillum</i> )                   | .     | 3     |
| Eastern mistletoe ( <i>Phoradendron leucarpum</i> )                        | .     | 10    |
| Hemlock dwarf mistletoe ( <i>Arceuthobium tsugense</i> )                   | .     | 2     |
| Juniper mistletoe ( <i>Phoradendron juniperinum</i> )                      | .     | 5     |
| Larch dwarf mistletoe ( <i>Arceuthobium laricis</i> )                      | .     | 1     |
| Limber pine dwarf mistletoe ( <i>Arceuthobium cyanocarpum</i> )            | .     | 4     |
| Lodgepole pine dwarf mistletoe ( <i>Arceuthobium americanum</i> )          | .     | 2     |
| Mistletoe ( <i>Phoradendron bolleanum</i> )                                | .     | 6     |
| Mistletoe ( <i>Phoradendron californicum</i> )                             | .     | 8     |

| Agent                                                                              | Guild | Hosts |
|------------------------------------------------------------------------------------|-------|-------|
| Pinyon dwarf mistletoe ( <i>Arceuthobium divaricatum</i> )                         | .     | 7     |
| Red fir dwarf mistletoe ( <i>Arceuthobium abietinum</i> f. sp. <i>magnificae</i> ) | .     | 2     |
| Western dwarf mistletoe ( <i>Arceuthobium campylopodum</i> )                       | .     | 3     |
| Western spruce dwarf mistletoe ( <i>Arceuthobium microcarpum</i> )                 | .     | 2     |

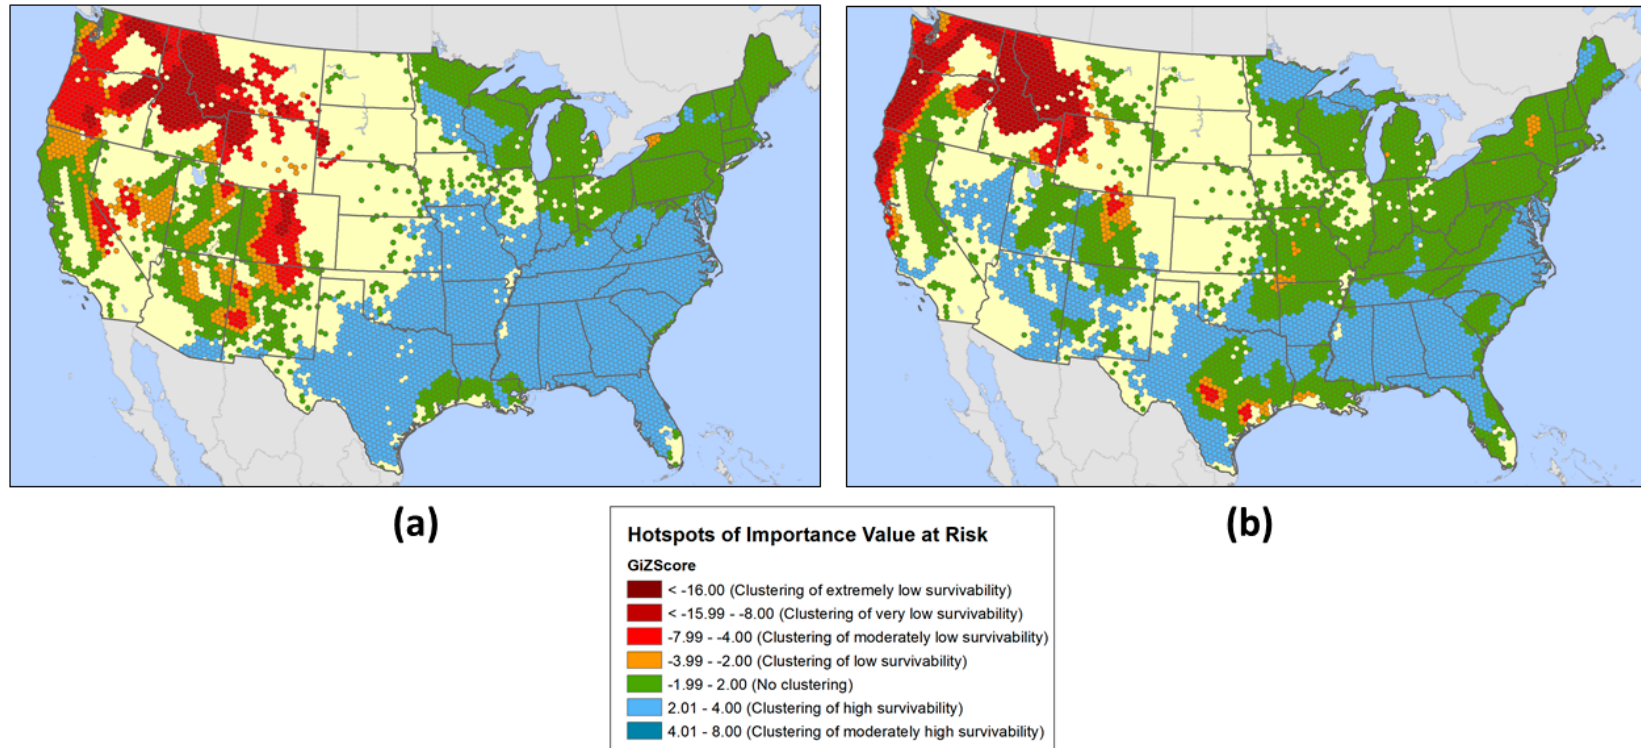

**Figure S1.** Hotspots of Importance Value at Risk (IVAR) for plots within 834 km<sup>2</sup> hexagons, encompassing both native and exotic insect and disease agents.  $G_i^*$  scores  $\leq -2$  (red) are significant clusters of low survivability scores (and therefore hotspots of IVAR, the opposite of survivability); scores  $>2$  (blue) are significant clusters of high survivability values (coldspots of IVAR). (a) Hotspots of IVAR for insect agents. (b) Hotspots of IVAR for disease agents.

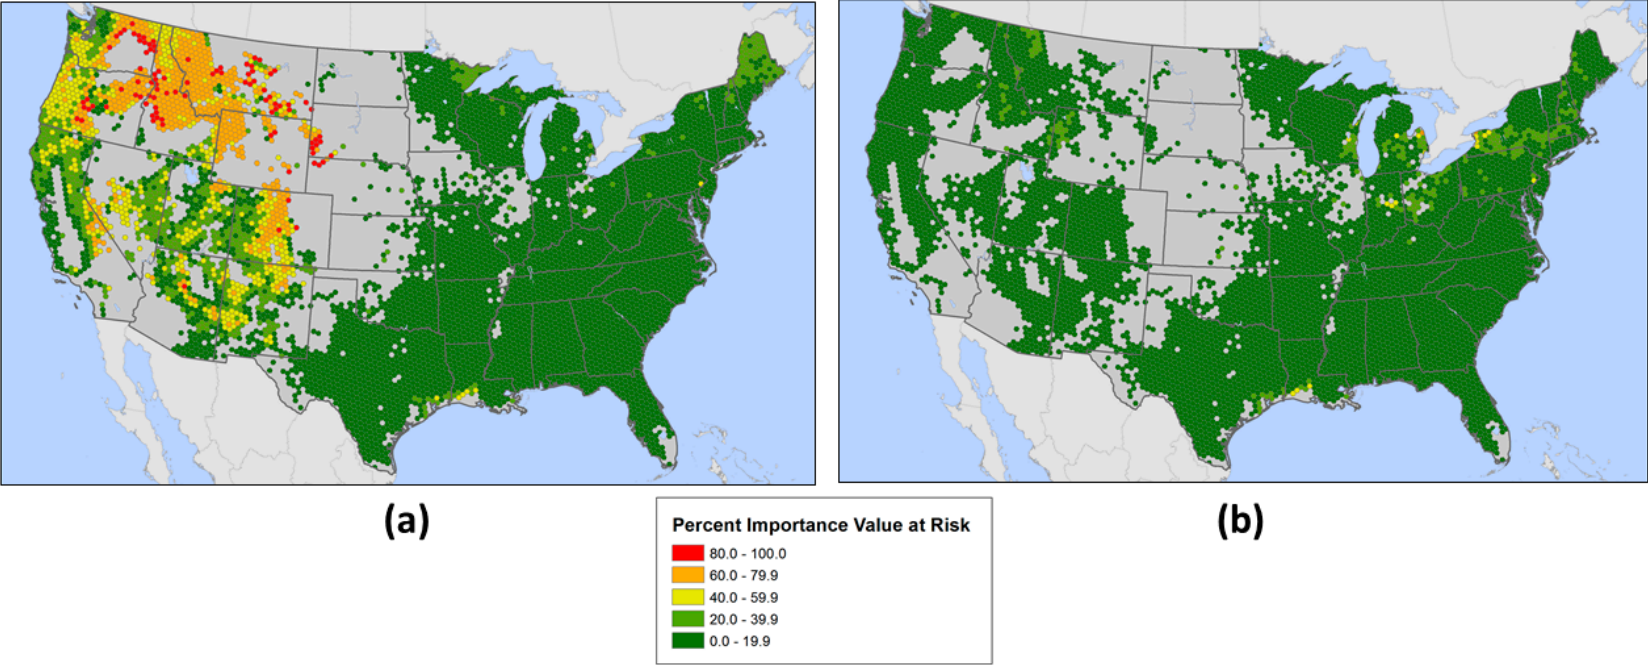

**Figure S2.** Mean percent host tree Importance Value at Risk (IVAR) for plots within 834 km<sup>2</sup> hexagons, encompassing insect agents. (a) IVAR for native insects. (b) IVAR for exotic insects.



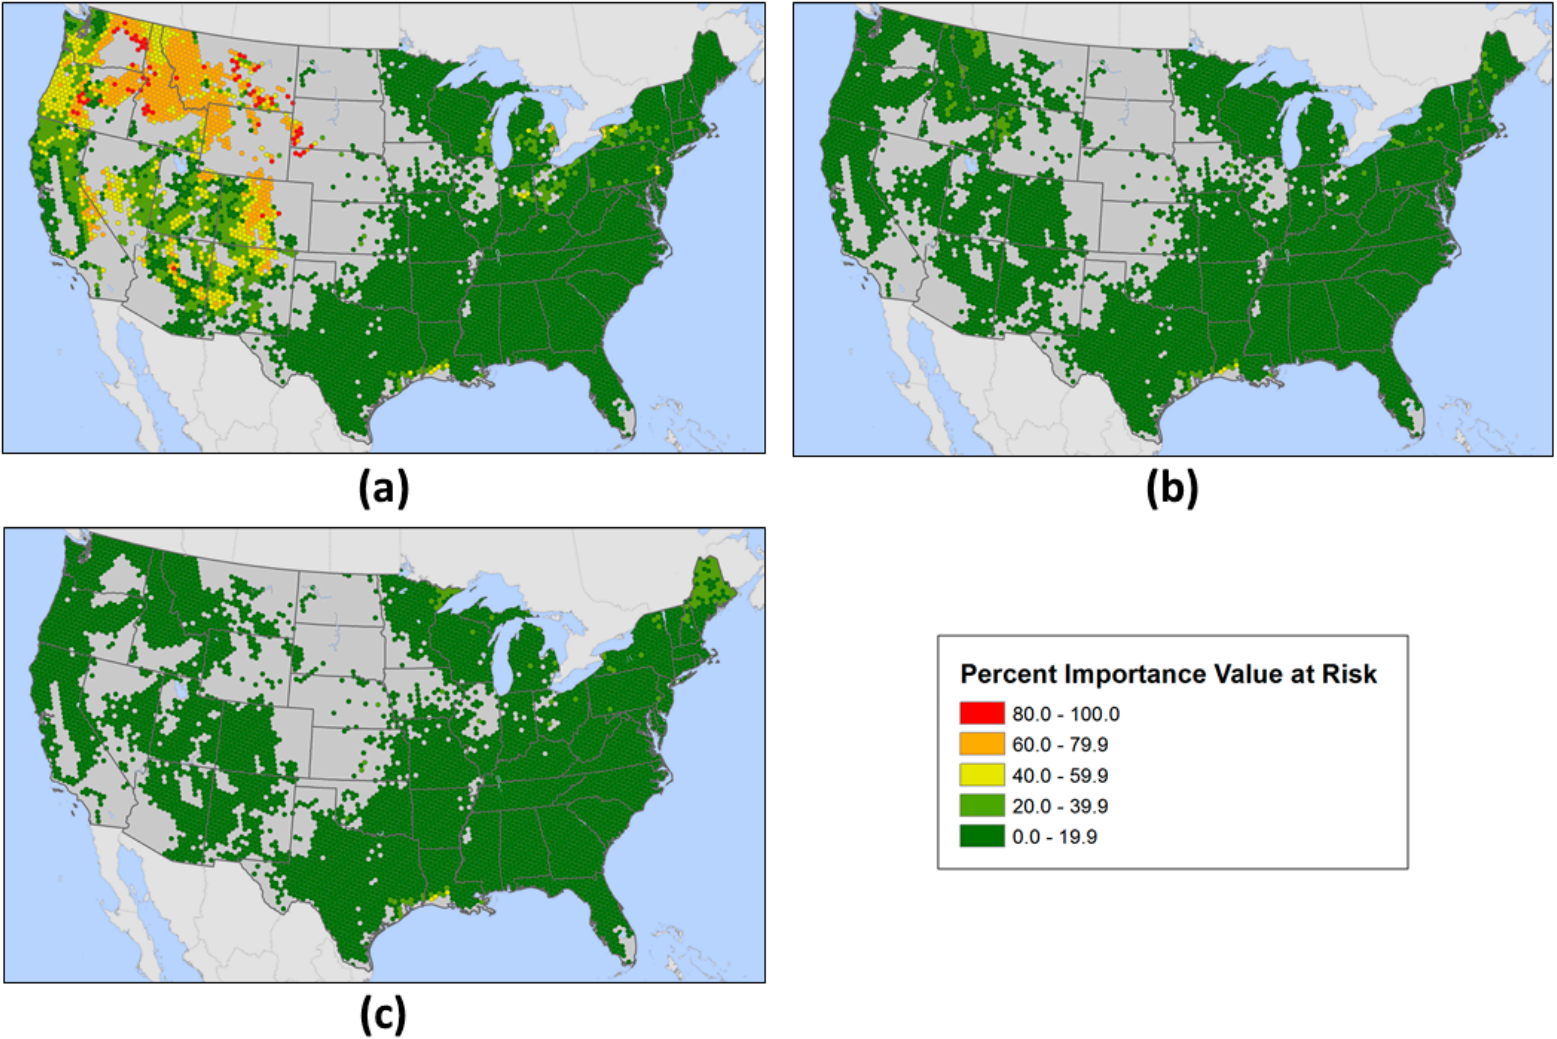

**Figure S3.** Mean percent host tree Importance Value at Risk (IVAR) for plots within 834 km<sup>2</sup> hexagons, encompassing insect agents. (a) IVAR for phloem- or wood-borers. (b) IVAR for sap-feeders. (c) IVAR for foliage-feeders.



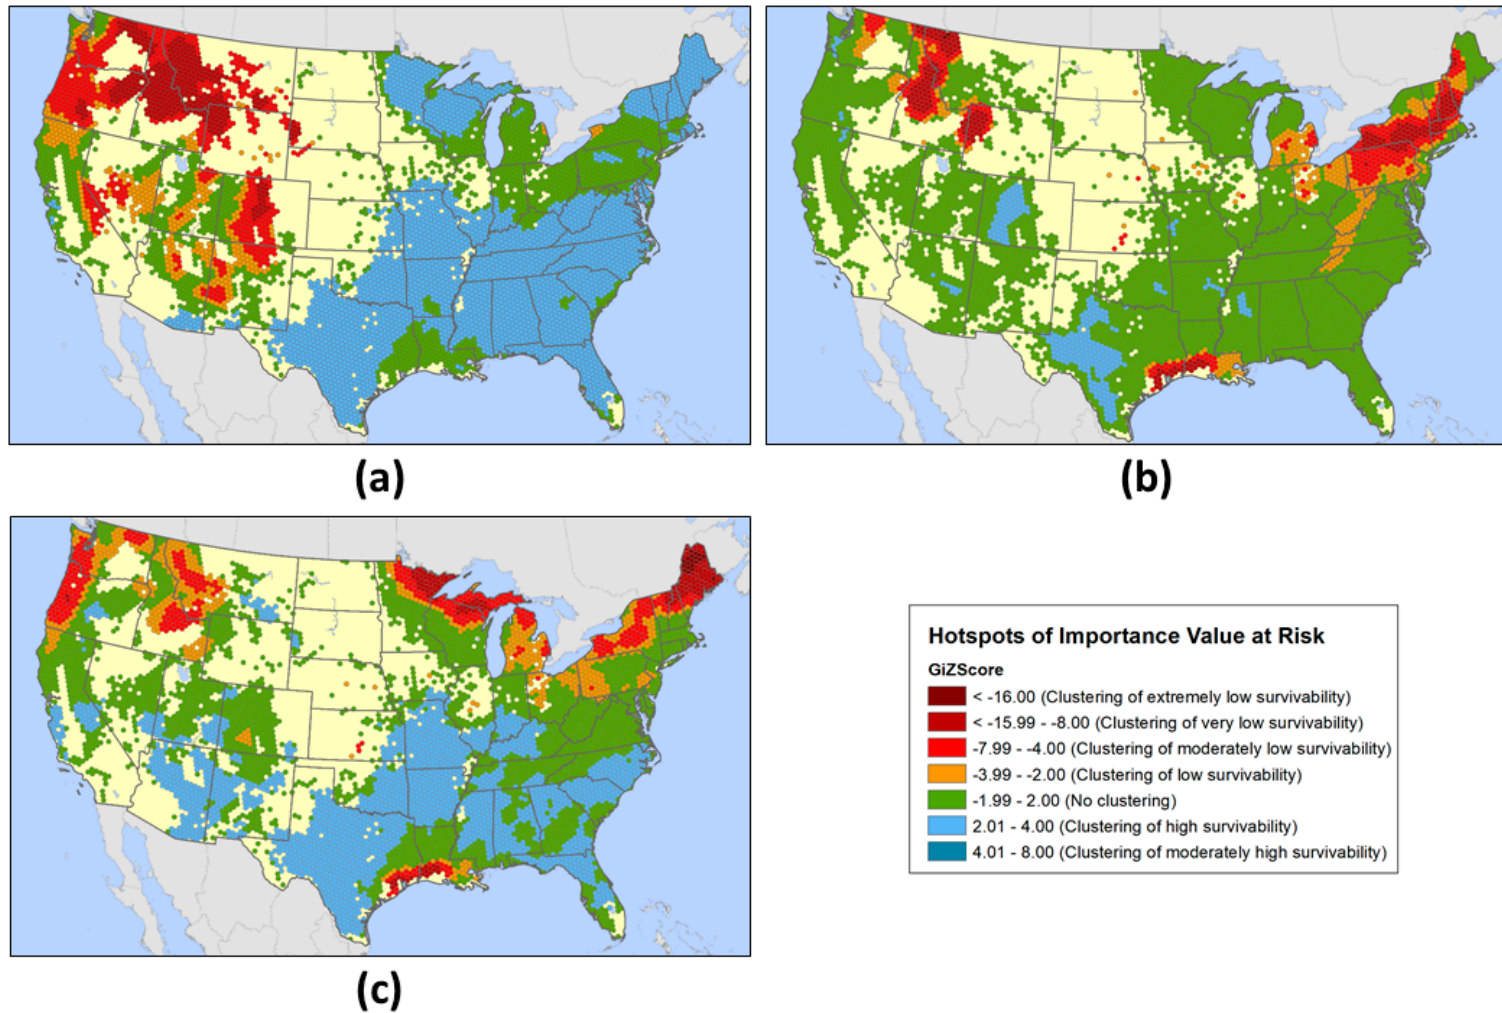

**Figure S4.** Hotspots of Importance Value at Risk (IVAR) for plots within 834 km<sup>2</sup> hexagons, encompassing insect agents.  $G_i^*$  scores  $\leq -2$  (red) are significant clusters of low survivability scores (and therefore hotspots of IVAR, the opposite of survivability); scores  $> 2$  (blue) are significant clusters of high survivability values (coldspots of IVAR). (a) Hotspots of IVAR for phloem- or wood-borers. (b) Hotspots of IVAR for sap-feeders. (c) Hotspots of IVAR for foliage-feeders.
